# Supplementary material for: A concise approach to the core structures of pinnaic acid and halichlorine
Source: Royal Society of Chemistry journal article supplement (doi:10.1039/b903904j), 2009-01-01

# **A Concise Approach to the Core Structures of Pinnaic Acid and Halichlorine**

**Sung-Hyun Yang,<sup>a</sup> G. R. Clark<sup>a</sup> and Vittorio Caprio<sup>\*a</sup>**

<sup>a</sup> *Department of Chemistry, University of Auckland, 23 Symonds Street, Auckland, New Zealand.*

For corresponding author:

V. Caprio

Mailing address: As above

Tel: 0064 9 3737599

Fax: 0064 9 3737422

Email: [v.caprio@auckland.ac.nz](mailto:v.caprio@auckland.ac.nz)

Supporting Information:

Contents

General Experimental 2

Experimental 3

**General.** All reactions were performed under a nitrogen atmosphere using oven-dried glassware. All solvents were dried by distillation from calcium hydride ( $\text{CH}_2\text{Cl}_2$ , DMF, toluene) or sodium-benzophenone (THF and diethyl ether). Flash chromatography was performed using Scharlau 60 (230-400 mesh ASTM) silica gel Thin layer chromatography was performed on Merck silica gel 60 F<sub>254</sub> plates. Melting points were measured by a Reicher-Kofler block and are uncorrected. IR spectra were recorded using a Perkin-Elmer Spectrum 1000 Fourier-Transform IR spectrometer. NMR spectra were recorded using a Bruker Avance 300 Spectrometer or a Bruker DRX 400 Spectrometer. <sup>1</sup>H NMR chemical shifts are reported in parts per million (ppm) relative to the tetramethylsilane peak ( $\delta$ 0.00 ppm). <sup>1</sup>H NMR values are reported as chemical shift  $\delta$ , relative integral, multiplicity, (s, singlet; d, doublet; t, triplet; q, quartet; quintet; m, multiplet), coupling constant ( $J$ )<sub>2</sub> and assignment. Coupling constants were taken directly from the spectra. Assignments were made with the aid of DEPT, COSY, HSQC, HMBC and NOESY experiments. The <sup>1</sup>H and <sup>13</sup>C NMR spectra of compounds **32** and **34** are complicated by the presence of a mixture of diastereoisomers. Resonances for individual diastereomers are denoted by asterisks. Low resolution and accurate mass data were recorded on a VG70SE spectrometer operating at a nominal accelerating voltage of 70 eV. Ionisation was effected using electron impact ( $\text{EI}^+$ ), chemical ionisation ( $\text{CI}^+$ ) using ammonia as a carrier gas, or fast atom bombardment ( $\text{FAB}^+$ ) using 3-nitrobenzylalcohol as the matrix. Major and significant fragments are quoted in the form  $x (y)$ , where  $x$  is the mass to charge ratio ( $m/z$ ) and  $y$  is the percentage abundance relative to the base peak (100%).

## Experimental Procedures

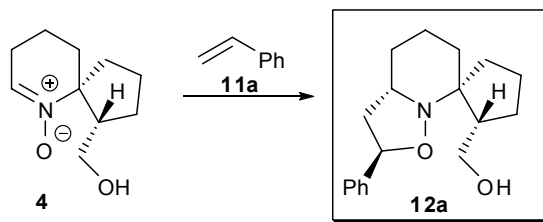

### (1*S*\*,2*S*\*,2'*R*\*,3*a*'*S*'\*)-2-hydroxymethyl-2'-phenylhexahydrospiro[cyclopentane-1,7'-isoxazolo[2,3-*a*]pyridine] **12a**.

A solution of styrene **11a** (2.60 g, 25.3 mmol) in toluene (30 mL) was added to a stirred solution of nitron **4** (1.10 g, 7.94 mmol) in toluene (45 mL) at 0 °C. The reaction mixture was stirred under reflux for 13 h then cooled to room temperature and concentrated. The crude residue was purified by column chromatography with 30% ethyl acetate-hexane as eluent to afford isoxazolidine **12a** (1.40 g, 64%) as a colourless solid. Recrystallisation of **12a** from diethyl ether and hexane yielded crystals suitable for X-ray crystallography.

Mp 69.5–73.2 °C.

$\nu_{\max}$  (solid)/cm<sup>-1</sup> 3415, 2939, 2875, 1643, 1449.

$\delta_{\text{H}}$  (300 MHz; CDCl<sub>3</sub>; Me<sub>4</sub>Si) 1.47-1.70 (8H, m, H-3<sub>a</sub>, H-4', H-5<sub>a</sub>, H-5', H-6'), 1.70-1.90 (3H, m, H-3<sub>b</sub>, H-4<sub>a</sub>, H-5<sub>b</sub>), 2.14-2.25 (2H, m, H-2, H-4<sub>b</sub>), 2.25-2.37 (1H, m, H-3'<sub>a</sub>), 2.37-2.47 (1H, m, 3'<sub>b</sub>-H), 3.54-3.64 (1H, m, H-3'a'), 3.66-3.72 (2H, m, CH<sub>2</sub>OH), 5.09 (1H, dd,  $J = 8.4, 6.6$  Hz, H-2'), 7.19-7.37 (5H, m, Ar).

$\delta_{\text{C}}$  (75 MHz; CDCl<sub>3</sub>; Me<sub>4</sub>Si) 19.1 (CH<sub>2</sub>), 21.3 (CH<sub>2</sub>), 26.5 (CH<sub>2</sub>), 27.7 (CH<sub>2</sub>), 29.6 (CH<sub>2</sub>), 37.8 (CH<sub>2</sub>), 44.4 (CH<sub>2</sub>), 45.5 (CH), 58.4 (CH), 65.4 (CH<sub>2</sub>), 69.7 (C), 76.4 (CH), 125.3 (CH), 127.0 (CH), 128.4 (CH), 144 (C).

$m/z$  (EI) 287.1885 (M<sup>+</sup> C<sub>18</sub>H<sub>25</sub>NO<sub>2</sub> requires 287.1884). 287 (M<sup>+</sup>, 49%). 270 (30), 228 (79), 215 (100), 143 (21), 130 (19), 77 (24), 41 (34).

### Crystal structure determination of isoxazolidine **12a**

**Crystal data.** C<sub>18</sub>H<sub>25</sub>NO<sub>2</sub>,  $M = 287.39$ , monoclinic,  $a = 7.0366(1)$ ,  $b = 20.6330(3)$ ,  $c = 10.9160(1)$  Å,  $\beta = 102.955(1)^\circ$ ,  $U = 1543.85(3)$ ,  $T = 84$  K, space group P2<sub>1</sub>,  $Z = 4$ , 7756 reflections measured, 4206 unique ( $R_{\text{int}} = 0.017$ ) which were used in all calculations. The final  $R$  was 0.0872 (all data).

### (1*S*\*,2*S*\*,2'*S*'\*,3*a*'*S*'\*)-2-(hydroxymethyl)-2'-(ethoxycarbonyl)hexahydrospiro[cyclopentane-1,7'-isoxazolo[2,3-*a*]pyridine] **12b**

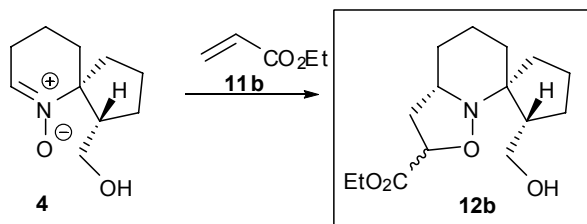

A solution of ethyl acrylate **11b** (0.89 mL, 8.18 mmol) in dichloromethane (1.0 mL) was added to a stirred solution of nitron **4** (0.1 g, 0.55 mmol) in

dichloromethane (10 mL) at room temperature and the reaction mixture stirred at this temperature for 48 h. The reaction mixture was then concentrated and the crude residue purified by column chromatography using 15% ethyl acetate-hexane as eluent to afford isoxazolidine **12b** (0.15 g, 94%) as a white solid.

Mp 62.5–63.7°C.

$\nu_{\max}$  (solid)/ $\text{cm}^{-1}$ : 3442, 2936, 2876, 1731, 1444, 1193.

$\delta_{\text{H}}$  (300 MHz;  $\text{CDCl}_3$ ;  $\text{Me}_4\text{Si}$ ) 1.28 (3 H, t,  $J = 7.1$  Hz,  $\text{OCH}_2\text{CH}_3$ ), 1.35–1.70 (8H, m, H-3<sub>a</sub>, H-4<sub>a</sub>, H-4', H-5', H-6'), 1.70–1.98 (3H, m, H-3<sub>b</sub>, H-4<sub>b</sub>, H-5<sub>a</sub>), 2.06–2.17 (1H, m, H-2), 2.17–2.29 (2H, m, H-3'<sub>a</sub>, H-5<sub>b</sub>), 2.42–2.55 (1 H, m, H-3'<sub>b</sub>), 3.39–3.52 (1H, m, H-3a'), 3.52–3.70 (2H, m,  $\text{CH}_2\text{OH}$ ), 4.22 (2H, q,  $J = 7.1$  Hz,  $\text{OCH}_2\text{CH}_3$ ), 4.45 (1H, dd,  $J = 9.6, 4.9$ , Hz, H-2').

$\delta_{\text{C}}$  (75 MHz;  $\text{CDCl}_3$ ;  $\text{Me}_4\text{Si}$ ) 14.0 ( $\text{CH}_3$ ), 19.4 ( $\text{CH}_2$ ), 21.4 ( $\text{CH}_2$ ), 26.6 ( $\text{CH}_2$ ), 28.3 ( $\text{CH}_2$ ), 30.3 ( $\text{CH}_2$ ), 38.6 ( $\text{CH}_2$ ), 40.0 ( $\text{CH}_2$ ), 44.9 (CH), 56.9 (CH), 61.1 ( $\text{CH}_2$ ), 65.4 ( $\text{CH}_2$ ), 69.1 (C), 72.4 (CH), 172.9 (C).

$m/z$  (FAB) found  $\text{MH}^+$  284.1869, ( $\text{C}_{15}\text{H}_{26}\text{NO}_4$  requires MH 284.1861). 284 ( $\text{MH}^+$ , 74%), 211 (14), 154 (100), 136 (67), 107 (23), 89 (22), 77 (21).

**(1*S*\*,2*S*\*,3*a*'*S*\*)-2'-ethoxy-2-hydroxymethylhexahydrospiro[cyclopentane-1,7'-isoxazolo[2,3-*a*]pyridine] 12c**

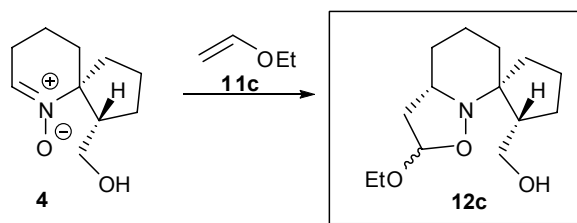

A solution of ethyl vinyl ether **11c** (4.65 g, 64.5 mmol) in ethanol (10 mL) was added to a stirred solution of nitron **4** (0.68 g, 3.69 mmol) in ethanol (25 mL) at 0 °C. The reaction mixture was stirred under reflux for 55 h then cooled to room temperature and concentrated. The crude residue was purified by column chromatography with 60% ethyl acetate-hexane as eluent to give isoxazolidine **12c** (0.75 g, 80%) as a colourless oil.

$\nu_{\max}$  (film)/ $\text{cm}^{-1}$ : 3429, 2939, 2876, 1642, 1443.

$\delta_{\text{H}}$  (300 MHz;  $\text{CDCl}_3$ ;  $\text{Me}_4\text{Si}$ ) 1.20 (3H, t,  $J = 7.1$  Hz,  $\text{CH}_3\text{CH}_a\text{H}_b\text{O}$ ) 1.35–1.65 (8H, m, H-3<sub>a</sub>, H-4<sub>a</sub>, H-4', H-5', H-6'), 1.65–1.95 (3H, m, H-3<sub>b</sub>, H-4<sub>b</sub>, H-5<sub>a</sub>), 2.0–2.20 (3H, m, H-3'<sub>a</sub>, H-2, H-5<sub>b</sub>), 2.20–2.30 (1H, m, H-3'<sub>b</sub>), 3.35–3.55 (2H, m, H-3a',  $\text{CH}_3\text{CH}_a\text{H}_b\text{O}$ ), 3.55–3.75 (3H, m,  $\text{CH}_3\text{CH}_a\text{H}_b\text{O}$ ,  $\text{CH}_2\text{OH}$ ), 5.05 (1H, dd,  $J = 2.7, 6.2$  Hz, H-2').

$\delta_{\text{C}}$  (75 MHz;  $\text{CDCl}_3$ ;  $\text{Me}_4\text{Si}$ ) 15.2 ( $\text{CH}_3$ ), 19.1 ( $\text{CH}_2$ ), 21.5 ( $\text{CH}_2$ ), 26.7 ( $\text{CH}_2$ ), 28.1 ( $\text{CH}_2$ ), 30.3 ( $\text{CH}_2$ ), 38.6 ( $\text{CH}_2$ ), 43.3 ( $\text{CH}_2$ ), 45.2 (CH), 56.9 (CH), 63.0 ( $\text{CH}_2$ ), 65.4 ( $\text{CH}_2$ ), 69.0 (C), 99.5 (CH).

$m/z$  (EI) 255.1835 ( $\text{M}^+$   $\text{C}_{14}\text{H}_{25}\text{NO}_3$  requires M 255.1834), 255 ( $\text{M}^+$ , 35%), 238 (42), 210 (32), 196 (100), 183 (67), 166 (22), 111 (52), 98 (44), 96 (42), 83 (24), 55 (31), 41 (46).

**(1*S*\*,2*S*\*,3*a*'*S*'\*)-2'-(2''-benzoyloxyethyl)-2-(hydroxymethyl)hexahydrospiro[cyclopentane-1,7'-isoxazolo[2,3-*a*]pyridine] 12d**

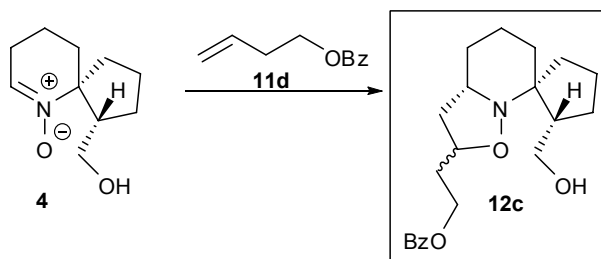

A solution of alkene **11d** (1.15g, 6.55 mmol) in toluene (2 mL) was added to a stirred solution of nitron **4** (0.40 g, 2.18 mmol) in toluene (4 mL) at 0 °C. The reaction mixture was stirred under reflux for 8 h then cooled to room temperature and concentrated. The crude residue was purified by column chromatography with 50% diethyl ether-hexane as eluent to give the isoxazolidine **12d** (0.55g, 70%) as a colourless oil.

$\nu_{\max}$  (film)/cm<sup>-1</sup> 3421, 2941, 1718, 1601, 1451, 1314, 1275.;  $\delta_{\text{H}}$  (400 MHz; CDCl<sub>3</sub>; Me<sub>4</sub>Si) 1.31-2.20 (17 H, m, H-2, H-3, H-3', H-1'', H-4, H-4', H-5, H-5', H-6'), 3.34-3.51 (1 H, br s, H-3a'), 3.64 (2 H, d,  $J = 5.7$  Hz, H-2''), 4.16-4.29 (1 H, m, H-2'), 4.41 (2 H, t,  $J = 6.0$  Hz, CH<sub>2</sub>OH), 7.38-7.47 (2 H, m, H-Ar), 7.50-7.58 (1 H, m, H-Ar), 8.00-8.07 (2 H, m, H-Ar).

$\delta_{\text{C}}$  (100 MHz; CDCl<sub>3</sub>; Me<sub>4</sub>Si) 19.2 (CH<sub>2</sub>), 20.9 (CH<sub>2</sub>), 26.6 (CH<sub>2</sub>), 27.6 (CH<sub>2</sub>), 30.8 (CH<sub>2</sub>), 35.3 (CH<sub>2</sub>), 37.8 (CH<sub>2</sub>), 41.3 (CH<sub>2</sub>), 45.1 (CH), 57.2 (CH), 62.2 (CH<sub>2</sub>), 65.1 (CH<sub>2</sub>), 69.2 (C), 71.7 (CH), 128.1, 129.3 (CH), 130.1 (C), 132.6 (CH), 166.3 (C).

$m/z$  (EI) 359.2091 (M<sup>+</sup> C<sub>21</sub>H<sub>29</sub>NO<sub>4</sub> requires 359.2097). 369 (M<sup>+</sup>, 41%), 342 (26), 300 (78), 287 (100), 105 (50), 77 (29), 41 (22) 55 (50), 41 (60).

**(1*S*\*,5*S*\*,7*S*'\*)-1-hydroxymethyl-7-((1'*R*'\*)-1'-hydroxy-1'-phenylethyl)-6-azaspiro[4.5]decane 13a.**

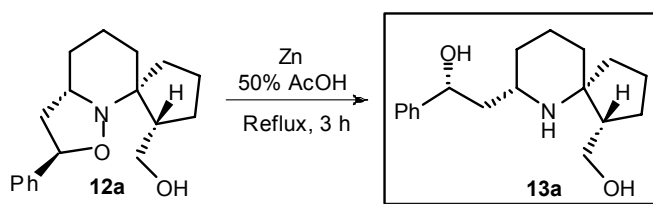

Zinc dust (0.29 g, 4.40 mmol) was added to a stirred solution of cycloadduct **12a** (0.12g, 0.4 mmol) in 50% aqueous acetic acid (2 mL) at room temperature. The reaction mixture was stirred under reflux for 3 h then a saturated aqueous solution of sodium bicarbonate was added. The aqueous phase was extracted with dichloromethane and the combined organic phases dried (MgSO<sub>4</sub>) and concentrated. The crude residue was purified by column chromatography with 90% dichloromethane-methanol as eluent afforded azaspiro[4.5]decane **13a** (0.09g, 76% ) as a white solid.

Mp 57.7-58.6 °C

$\nu_{\max}$  (film)/ $\text{cm}^{-1}$ : 3412, 2931, 1452.

$\delta_{\text{H}}$  (400 MHz;  $\text{C}_6\text{D}_6$ ;  $\text{Me}_4\text{Si}$ ) 0.70-0.85 (2H, m, H-8<sub>a</sub>, H-10<sub>a</sub>), 1.15-1.25 (1H, m, H-4<sub>a</sub>), 1.25-1.46 (5H, m, H-2'<sub>a</sub>, H-3, H-8<sub>b</sub>, H-10<sub>b</sub>), 1.46-1.67 (5H, m, H-2, H-4<sub>b</sub>, H-9, 1.68-1.78 (1H, m, H-2'<sub>b</sub>), 1.84-1.93 (1H, m, H-1), 3.00-3.12 (1H, m, H-7), 3.55-3.67 (2H, m,  $\text{CH}_2\text{OH}$ ), 5.04 (1H, dd,  $J = 10.2, 2.2$  Hz, H-1'), 7.00-7.30 (5H, m, H-Ar).

$\delta_{\text{C}}$  (75 MHz;  $\text{CDCl}_3$ ;  $\text{Me}_4\text{Si}$ ) 20.6 ( $\text{CH}_2$ ), 21.4 ( $\text{CH}_2$ ), 28.4 ( $\text{CH}_2$ ), 33.3 ( $\text{CH}_2$ ), 37.3 ( $\text{CH}_2$ ), 41.7 ( $\text{CH}_2$ ), 42.6 (CH), 47.3 ( $\text{CH}_2$ ), 50.3 (CH), 64.0 (C), 65.3 ( $\text{CH}_2$ ), 70.0 (CH), 126.1 (CH), 127.0 (CH), 128.4 (CH), 146.6 (C).

$m/z$  (EI) 289.2039 ( $\text{M}^+$   $\text{C}_{18}\text{H}_{27}\text{NO}_2$  requires 289.2041). 289 ( $\text{M}^+$ , 29%), 272 (16), 230 (48), 217 (58), 169 (100), 108 (66), 96 (82), 79 (44), 96 (42), 77 (30), 55 (32), 41 (26).

**(1*S*\*,5*S*\*,7*S*\*)-1-hydroxymethyl-7-(2'-ethyloxycarbonyl-2'-hydroxyethyl)-6-azaspiro[4.5]decane (13b)**

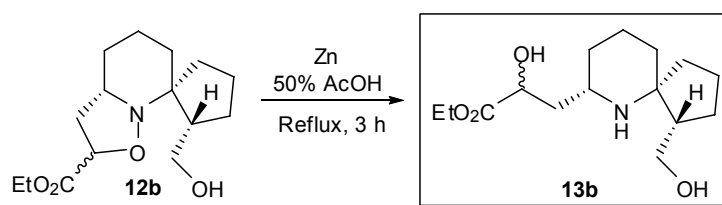

Zinc dust (0.041 g, 1.76 mmol) was added to a stirred solution of cycloadduct **12a** (0.05g, 0.16 mmol) in 50% aqueous acetic acid (0.9 mL) at room temperature. The reaction mixture was stirred under reflux for 3 h then a saturated aqueous solution of sodium bicarbonate was added. The aqueous phase was extracted with dichloromethane and the combined organic phases dried ( $\text{MgSO}_4$ ) and concentrated. The crude residue was purified by column chromatography with 90% dichloromethane-methanol as eluent afforded azaspiro[4.5]decane **13a** (0.03g, 70% ) as a yellow oil.

$\nu_{\max}$  (film)/ $\text{cm}^{-1}$ : 3368, 2933, 1732, 1443, 1210.

$\delta_{\text{H}}$  (300 MHz;  $\text{CDCl}_3$ ;  $\text{Me}_4\text{Si}$ ) 1.29 (3H, t,  $J = 7.1$  Hz,  $\text{CH}_3\text{CH}_2\text{O}$ ), 1.29-1.31 (2H, m, H-8<sub>a</sub>, H-10<sub>a</sub>), 1.55-1.97 (12H, m, H-1', H-2, H-3, H-4, H-8<sub>b</sub>, H-9, H-10<sub>b</sub>), 2.15-2.26 (1H, br s, H-1), 3.20-3.27 (1H, m, H-7), 3.67-3.78 (2H, m,  $\text{CH}_2\text{OH}$ ), 4.23 (2H, q,  $J = 7.1$  Hz,  $\text{CH}_3\text{CH}_2\text{O}$ ), 4.48 (1H, dd,  $J = 7.4, 3.9$  Hz, H-2').

$\delta_{\text{C}}$  (75 MHz;  $\text{CDCl}_3$ ;  $\text{Me}_4\text{Si}$ ) 14.1 ( $\text{CH}_3$ ), 20.0 ( $\text{CH}_2$ ), 20.5 ( $\text{CH}_2$ ), 27.8 ( $\text{CH}_2$ ), 31.8 ( $\text{CH}_2$ ), 35.9 ( $\text{CH}_2$ ), 39.2 ( $\text{CH}_2$ ), 40.2 ( $\text{CH}_2$ ), 42.1 (CH), 51.4 (CH), 61.3 ( $\text{CH}_2$ ), 64.4 ( $\text{CH}_2$ ), 64.9 (C), 68.5 (CH), 174.5 (C).

$m/z$  (EI) 285.1943 ( $\text{M}^+$   $\text{C}_{15}\text{H}_{27}\text{NO}_4$  requires 285.1940). 285 ( $\text{M}^+$ , 22%), 268 (37), 226 (89), 213 (53), 150 (90), 96 (100), 41 (44).

**(1*S*\*,5*S*\*,7*S*\*)-1-Hydroxymethyl-7-(2'-hydroxybenzoyloxybutyl)-6-azaspiro[4.5]decane (13d)**

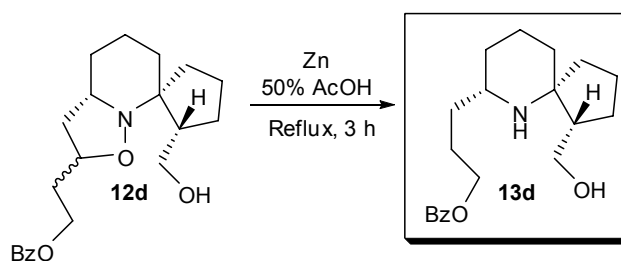

Zinc dust (0.16 g, 2.42 mmol) was added to a stirred solution of cycloadduct **12a** (0.08 g, 0.22 mmol) in 50% aqueous acetic acid (1.1 mL) at room temperature. The reaction mixture was stirred under reflux for 3 h then a saturated aqueous solution of sodium bicarbonate was added. The aqueous phase was extracted with dichloromethane and the combined organic phases dried ( $\text{MgSO}_4$ ) and concentrated. The crude residue was purified by column chromatography with 90% dichloromethane-methanol as eluent afforded azaspiro[4.5]decane **13a** (0.065 g, 81%) as a yellow oil.

$\nu_{\text{max}}$  (film)/ $\text{cm}^{-1}$ : 3418, 2934, 1714, 1648, 1451, 1277.

$\delta_{\text{H}}$  (300 MHz;  $\text{CDCl}_3$ ;  $\text{Me}_4\text{Si}$ ) 1.08-1.23 (2H, m, H-8<sub>a</sub>, H-10<sub>a</sub>), 1.38-1.60 (7H, m, H-1', H-2<sub>a</sub>, H-4<sub>a</sub>, H-8<sub>b</sub>, H-9), 1.67-1.95 (7H, m,  $\text{BzOCH}_2\text{CH}_2$ , H-2<sub>b</sub>, H-3, H-4<sub>b</sub>, H-10<sub>b</sub>), 2.10-2.27 (1H, m, H-1), 3.08-3.25 (1H, m, H-7), 3.69 (2H, d,  $J = 6$  Hz,  $\text{CH}_2\text{OH}$ ), 4.01-4.15 (1H, m, H-2'), 4.46 (2H, t,  $J = 6.5$  Hz,  $\text{BzOCH}_2\text{CH}_2$ ), 7.30-7.48 (2H, m, H-Ar), 7.48-7.62 (1H, m, H-Ar), 7.92-8.10 (2H, m, H-Ar).

$\delta_{\text{C}}$  (75 MHz;  $\text{CDCl}_3$ ;  $\text{Me}_4\text{Si}$ ) 19.7 ( $\text{CH}_2$ ), 20.7 ( $\text{CH}_2$ ), 27.5 ( $\text{CH}_2$ ), 32.1 ( $\text{CH}_2$ ), 36.1 ( $\text{CH}_2$ ), 36.4 ( $\text{CH}_2$ ), 40.2 ( $\text{CH}_2$ ), 41.6 (CH), 43.2 ( $\text{CH}_2$ ), 50.4 (CH), 62.2 ( $\text{CH}_2$ ), 64.4 (C), 64.7 ( $\text{CH}_2$ ), 64.7 (CH), 128.2 (CH), 129.4 (CH), 130.2 (C), 132.7 (CH), 166.6 (C).

$m/z$  (EI) 361.2251 ( $\text{M}^+$   $\text{C}_{21}\text{H}_{31}\text{NO}_4$  requires 361.2253). 361 ( $\text{M}^+$ , 30%), 344 (29), 302 (77), 289 (70), 169 (65), 105 (79), 96 (100), 77 (46), 57 (58), 41 (48).

**(1*S*\*,5*S*\*,7*S*\*)-1-hydroxymethyl-7-(1'-hydroxyethyl)-6-azaspiro[4.5]decane 14.**

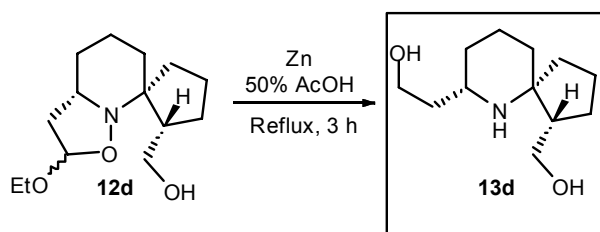

Palladium hydroxide (0.04 g, 0.06 mmol) was added to a stirred solution of compound **12c** (0.08 g, 0.31 mmol) in methanol (30 mL) at room temperature. The suspension was stirred under hydrogen for 48 h, filtered through a pad of Celite<sup>®</sup> and the filtrate concentrated. The crude residue was purified by column chromatography with 30% ethanol-dichloromethane as eluent to afford azaspiro[4.5]decane **14** (0.31 g, 44%) as an orange oil.

$\nu_{\text{max}}$  (film)/ $\text{cm}^{-1}$ : 3304, 2930, 2873, 1573, 1441, 1332;  $\delta_{\text{H}}$  (300 MHz;  $\text{C}_6\text{D}_6$ ;  $\text{Me}_4\text{Si}$ ) 1.05-1.20 (2H, m, H-8<sub>a</sub>, H-10<sub>a</sub>), 1.44-1.57 (4H, m, H-2'<sub>a</sub>, H-4<sub>a</sub>, H-9), 1.57-1.88 (8H, m, H-2, H-2'<sub>b</sub>, H-3, H-4<sub>b</sub>, H-8<sub>b</sub>, H-10<sub>b</sub>), 2.12-2.29 (1H, m, H-1), 2.95-3.12

(1H, m, H-7), 3.57-3.66 (1H, m,  $CH_aH_bOH$ ), 3.66-3.86 (3H, m,  $CH_aH_bOH$ , H-1').  
 $\delta_c$  (75 MHz;  $CDCl_3$ ;  $Me_4Si$ ) 19.9 ( $CH_2$ ), 20.9 ( $CH_2$ ), 21.3 ( $CH_2$ ), 32.8 ( $CH_2$ ), 36.5 ( $CH_2$ ), 38.6 ( $CH_2$ ), 40.4 ( $CH_2$ ), 42.0 (CH), 52.6 (CH), 60.6 ( $CH_2$ ), 64.0 (C), 64.5 ( $CH_2$ ).

$m/z$  (EI) 213.1729 ( $M^+$   $C_{12}H_{23}NO_2$  requires 213.1728), 213 ( $M^+$ , 17%), 196 (38), 168 (23), 15 (100), 141 (60), 110 (36), 96 (61), 67 (14), 55 (21), 41 (27), 39 (9).

**(1*S*\*,5*S*\*)-7-((1'*S*')-1'-hydroxy-1'-phenylethyl)-1-(hydroxymethyl)-6-azaspiro[4.5]dec-6-ene-6-oxide 17**

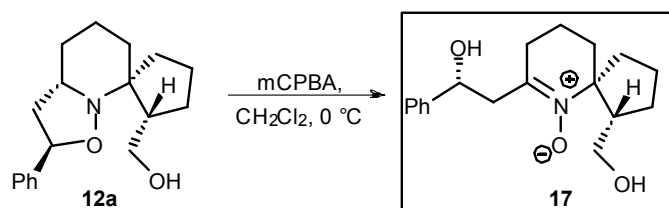

A solution of *m*-CPBA (0.09 g, 0.05 mmol) in dichloromethane (4 mL) was added dropwise over 1 h to a stirred solution of isoxazolidine **12a** (0.1 g, 0.34 mmol) in dichloromethane (2 mL) at 0 °C. The reaction mixture was stirred for a further 10 min at the same temperature and a mixture of saturated aqueous sodium thiosulfate:sodium hydrogen carbonate (1:1, 20 mL) was added. The aqueous phase was extracted with dichloromethane (3 x 10 mL) and the combined organic extracts dried ( $MgSO_4$ ) and concentrated. The crude residue was purified by column chromatography with 5% methanol-dichloromethane as eluent to afford nitronium **17** (0.09 g, 85%) as a colourless oil.

$\nu_{max}$  (film)/ $cm^{-1}$ : 3254, 2938, 2872, 1713, 1602, 1449, 1133, 1116, 925.

$\delta_H$  (300 MHz;  $CDCl_3$ ;  $Me_4Si$ ) 1.55-1.62 (1H, m, H-3<sub>a</sub>), 1.62-1.71 (2H, m, H-9), 1.71-1.87 (3H, m, H-2<sub>a</sub>, H-4<sub>a</sub>, H-10<sub>a</sub>), 1.87-2.00 (2H, m, H-1, H-10<sub>b</sub>), 2.00-2.08 (1H, m, H-3<sub>b</sub>), 2.14-2.25 (1H, m, H-2<sub>b</sub>), 2.32-2.44 (2H, m, H-8), 2.68-2.77 (1H, m, H-4<sub>b</sub>), 2.81 (1H, dd,  $J = 12.7, 3.4$  Hz, H-2'<sub>a</sub>), 3.07 (1H, dd,  $J = 12.7, 9.1$  Hz, H-2'<sub>b</sub>), 3.67-3.82 (2H, m,  $CH_2OH$ ), 5.22 (1H, dd,  $J = 9.1, 3.4$  Hz, H-1'), 7.22-7.28 (1H, m, H-Ar), 7.31-7.34 (2H, m, H-Ar), 7.39-7.41 (2H, m, H-Ar).

$\delta_c$  (75 MHz;  $CDCl_3$ ;  $Me_4Si$ ) 16.2 ( $CH_2$ ), 24.1 ( $CH_2$ ), 28.7 ( $CH_2$ ), 31.9 ( $CH_2$ ), 37.3 ( $CH_2$ ), 39.0 ( $CH_2$ ), 43.6 ( $CH_2$ ), 53.2 (CH), 60.9 ( $CH_2$ ), 72.7 (CH), 77.3 (C), 125.2 (CH), 127.3 (CH), 128.3 (CH), 144.5 (C), 154.0 (C).

$m/z$  (FAB) 304.1910 ( $MH^+$   $C_{18}H_{26}NO_3$  requires 304.1912). 304 ( $MH^+$ , 18%), 289 (12), 154 (100), 136 (66), 107 (22), 89 (20), 77 (21).



**(1*S*\*,5*S*\*,7*R*\*)-7-((1'*S*\*)-1'-hydroxy-1'-phenylethyl)-1-(hydroxymethyl)-6-azaspiro[4.5] decan-6-ol **18****

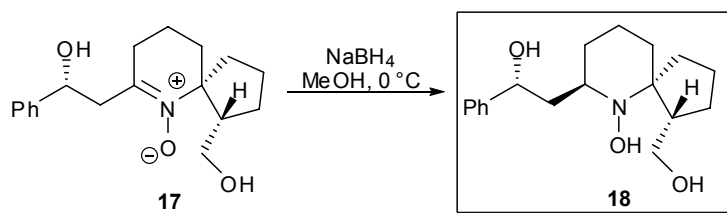

Sodium borohydride (0.08 g, 2.24 mmol) was added in one portion to a stirred solution of nitron **17** (0.1 g, 0.35 mmol) in methanol (5 mL) at 0 °C. The reaction mixture was then stirred at room temperature for a further 15 min and concentrated. The residue was diluted with ethyl acetate (20 mL) and brine (20 mL) and the aqueous phase was further extracted with ethyl acetate (3 x 10 mL). The combined organic extracts were dried (MgSO<sub>4</sub>) and concentrated and the crude residue purified by column chromatography with 5 % methanol-dichloromethane as eluent to give *N*-hydroxyazaspiro[4.5]decane **18** (0.09 g, 90%) as a white solid. Recrystallisation of the **18** from diethyl ether and hexane yielded crystals suitable for X-ray crystallography.

Mp 129.8-131.7 °C.

$\nu_{\max}$  (film)/cm<sup>-1</sup>: 3444, 2959, 2930, 2860, 1460, 1274, 1123.

$\delta_{\text{H}}$  (300 MHz; CDCl<sub>3</sub>; Me<sub>4</sub>Si) 1.07-1.21 (2H, m, H-2<sub>a</sub>, H-8<sub>a</sub>), 1.21-1.28 (1H, m, H-10<sub>a</sub>), 1.35 (1H, t, *J* = 14.3, 1.8 Hz, H-2'<sub>a</sub>), 1.47-1.73 (5H, m, 3-H, H-4<sub>a</sub>, H-9), 1.73-1.89 (2H, m, H-2<sub>b</sub>, H-8<sub>b</sub>), 1.89-2.05 (3H, m, H-1, H-4<sub>b</sub>, H-10<sub>b</sub>), 2.26 (1H, dd, *J* = 14.3, 11.0 Hz, H-2'<sub>b</sub>), 3.06 (1H, dd, *J* = 10.4, 2.7 Hz, CH<sub>a</sub>CH<sub>b</sub>OH), 3.04-3.18 (1H, m, H-7), 3.67 (1H, d, *J* = 10.4 Hz, CH<sub>a</sub>CH<sub>b</sub>OH), 4.90 (1H, dd, *J* = 11.0, 1.8, H-1'), 7.17-7.26 (1H, m, H-Ar), 7.26-7.36 (2H, m, H-Ar), 7.36-7.45 (2H, m, H-Ar).

$\delta_{\text{C}}$  (75 MHz; CDCl<sub>3</sub>; Me<sub>4</sub>Si) 20.3 (CH<sub>2</sub>), 20.9 (CH<sub>2</sub>), 23.9 (CH<sub>2</sub>), 26.3 (CH<sub>2</sub>), 26.7 (CH<sub>2</sub>), 29.6 (CH<sub>2</sub>), 39.5 (CH<sub>2</sub>), 50.0 (CH), 61.6 (CH), 64.5 (CH<sub>2</sub>), 71.3 (C), 76.7 (CH), 125.7 (CH), 127.0 (CH), 128.2 (CH), 144.4 (C).

*m/z* (FAB) 306.2067 (MH C<sub>18</sub>H<sub>28</sub>NO<sub>3</sub> requires 306.2069). 306 (MH<sup>+</sup>, 27%), 289 (13), 154 (100), 136 (67), 107 (23), 89 (20), 77 (20).

**Crystal structure determination of azaspirodecane **18****

**Crystal data.** C<sub>18</sub>H<sub>27</sub>NO<sub>3</sub>, *M* = 305.41, triclinic, *a* = 6.2552(1), *b* = 10.5282(2), *c* = 13.4329(2) Å,  $\alpha$  = 104.454(1)°,  $\beta$  = 101.796(1)°,  $\gamma$  = 97.250(1)°, *U* = 823.76(2), *T* = 84 K, space group P-1, *Z* = 2, 7744 reflections measured, 3258 unique (*R*<sub>int</sub> = 0.034) which were used in all calculations. The final *R* was 0.074 (all data).

**(1*S*\*,5*S*\*,7*R*\*)-7-((1'*S*')-1'-hydroxy-1'-phenylethyl)-1-(hydroxymethyl)-6-hydroxyazaspiro[4.5] decane **19****

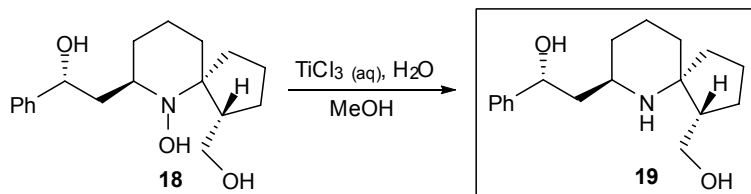

A solution of titanium trichloride (0.03 g, 0.37 mmol) in water (0.15 mL) was added dropwise to a stirred solution of hydroxylamine **18** (0.04 g, 0.12 mmol) in methanol (4 mL) at room temperature. The reaction mixture was stirred at room temperature for 3 h, dried (MgSO<sub>4</sub>) and concentrated. The residue was purified by column chromatography with 5 % methanol-dichloromethane as eluent to afford azaspiro[4.5]decane **19** (0.03 g, 92%) as a yellow oil.

$\nu_{\max}$  (film)/cm<sup>-1</sup>: 3444, 2959, 2831, 2873, 1459, 1274, 1123, 1073.

$\delta_{\text{H}}$  (300 MHz; CDCl<sub>3</sub>; Me<sub>4</sub>Si) 1.47-1.63 (3H, m, H-3<sub>a</sub>, H-4), 1.63-1.91 (7H, m, H-2, H-2'<sub>a</sub>, H-3<sub>b</sub>, H-8<sub>a</sub>, H-9), 1.91-2.12 (4H, m, H-1, H-8<sub>b</sub>, H-10), 2.52-2.65 (1H, m, H-2'<sub>b</sub>), 3.32-3.45 (1H, m, H-7), 3.64 (1H, dd, *J* = 11.5, 6.3, Hz, CH<sub>a</sub>H<sub>b</sub>OH), 4.03 (1H, dd, *J* = 11.5, 3.1 Hz, CH<sub>a</sub>H<sub>b</sub>OH), 4.84 (1H, dd, 11.1, 2.6, Hz, H-1'), 7.18-7.42 (5H, m, H-Ar).

$\delta_{\text{C}}$  (75 MHz; CDCl<sub>3</sub>; Me<sub>4</sub>Si) 20.3 (CH<sub>2</sub>), 22.1 (CH<sub>2</sub>), 26.6 (CH<sub>2</sub>), 29.0 (CH<sub>2</sub>), 32.9 (CH<sub>2</sub>), 33.1 (CH<sub>2</sub>), 41.0 (CH<sub>2</sub>), 49.5 (CH), 54.9 (CH), 60.7 (CH<sub>2</sub>), 67.4 (C), 73.1 (CH), 125.8 (CH), 127.6 (CH), 128.4 (CH), 143.4 (C).

*m/z* (EI) 289.2042 (M, C<sub>18</sub>H<sub>27</sub>NO<sub>2</sub> requires 289.2041). 289 (M<sup>+</sup>, 56%), 272 (25), 254 (37), 247 (38), 230 (74), 217 (88), 169 (100), 108 (88), 96 (80), 79 (68), 55 (60), 41 (55), 36 (43).

**(1*S*\*,2*S*\*,2'*S*\*,3*a*'*S*\*)-2-(hydroxymethyl)-2'-(1''-benzyloxycarbonylpropyl)hexahydrospiro[cyclopentane-1,7'-isoxazolo[2,3-*a*]pyridine] **20****

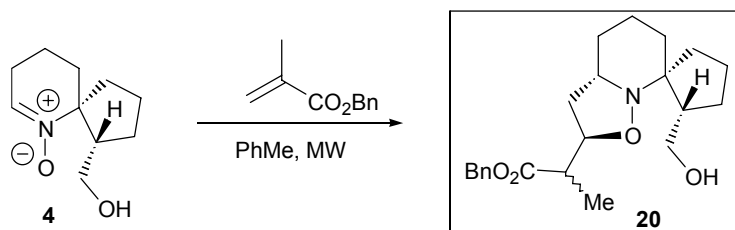

A 10 mL microwave reaction vial was charged with nitron **4** (0.10 g, 0.54 mmol), dipolarophile **8** (0.21 g, 1.09 mmol) and toluene (3 mL). The vial was sealed with a cap containing a silicon septum, loaded into the cavity of a focussed microwave reactor (Discover® CEM, 300W) and heated at 165 °C for 50 min. (The following microwave reactor conditions were used: Power: 250 KW, ramp time: 5 min 30 sec). The reaction mixture was cooled to room temperature, concentrated under reduced pressure and the crude residue purified by column chromatography with 15% ethyl acetate-hexane as eluent to afford isoxazolidine **20** (0.17 g, 83%) as a yellow oil and as a separable 1:1 diastereomeric mixture.

Data for less polar diastereomer:

$\nu_{\max}$  (film)/ $\text{cm}^{-1}$ : 3443, 2958, 2931, 2873, 1728, 1599, 1579, 1461, 1274.

$\delta_{\text{H}}$  (300 MHz;  $\text{CDCl}_3$ ;  $\text{Me}_4\text{Si}$ ) 1.25 (3H, d,  $J = 6.9$  Hz, H-2''), 1.30-1.63 (8H, m, H-3<sub>a</sub>, H-4<sub>a</sub>, H-4', H-5', H-6'), 1.63-1.93 (3H, m, H-3<sub>b</sub>, H-4<sub>b</sub>, H-5<sub>a</sub>), 1.93-2.08 (2H, m, H-3'<sub>a</sub>, H-5<sub>b</sub>), 2.08-2.12 (2H, m, H-2, H-3'<sub>b</sub>), 2.66 (1H, dq,  $J = 7.6, 6.9$ , H-1''), 3.35-3.48 (1H, br d,  $J = 5.8$  Hz, H-3<sub>a</sub>'), 3.56-3.65 (2H, m,  $\text{CH}_2\text{OH}$ ), 4.08-4.15 (1H, dt,  $J = 7.6, 5.9$  Hz H-2'), 5.11 (2H, d,  $J = 7.3$  Hz,  $\text{CH}_2\text{Ph}$ ), 7.30-7.38 (5H, m, H-Ar).

$\delta_{\text{C}}$  (75 MHz;  $\text{CDCl}_3$ ;  $\text{Me}_4\text{Si}$ ) 14.5 ( $\text{CH}_3$ ), 19.2 ( $\text{CH}_2$ ), 21.2 ( $\text{CH}_2$ ), 26.4 ( $\text{CH}_2$ ), 27.8 ( $\text{CH}_2$ ), 30.2 ( $\text{CH}_2$ ), 38.2 ( $\text{CH}_2$ ), 40.0 ( $\text{CH}_2$ ), 45.3 (CH) (2C), 57.8 (CH), 65.4 ( $\text{CH}_2$ ), 66.1 ( $\text{CH}_2$ ), 69.2 (C), 76.0 (CH), 128.0 (CH), 128.1 (CH), 128.5 (CH), 135.9 (C), 174.3 (C).

$m/z$  (EI) 373.2253 ( $\text{C}_{22}\text{H}_{31}\text{NO}_4$  requires  $M^+$  373.2253). 373 ( $M^+$ , 31%), 356 (22), 314 (56), 301 (32), 91 (100).

Data for more polar diastereomer:

$\nu_{\max}$  (film)/ $\text{cm}^{-1}$ : 3448, 2958, 2931, 2873, 1727, 1578, 1459, 1273.

$\delta_{\text{H}}$  (300 MHz;  $\text{CDCl}_3$ ;  $\text{Me}_4\text{Si}$ ) 1.10 (3H, d,  $J = 7.0$  Hz, H-2''), 1.23-1.68 (10H, m, H-3<sub>a</sub>, H-4, H-4', H-5<sub>a</sub>, H-5', H-6'), 1.68-1.96 (2H, m, H-3<sub>b</sub>, H-5<sub>b</sub>), 1.96-2.08 (2H, m, H-3'), 2.08-2.15 (1H, m, H-2), 2.70 (1H, dq,  $J = 8.8, 7.0$  Hz, H-1''), 3.40-3.51 (1H, br d,  $J = 6.3$  Hz, H-3<sub>a</sub>'), 3.54-3.64 (2H, m,  $\text{CH}_2\text{OH}$ ), 4.20 (1H, dt,  $J = 8.8, 6.0$  Hz, H-2'), 5.14 (2H, d,  $J = 4.9$  Hz,  $\text{CH}_2\text{Ph}$ ), 7.29-7.36 (5H, m, H-Ar).

$\delta_{\text{C}}$  (75 MHz;  $\text{CDCl}_3$ ;  $\text{Me}_4\text{Si}$ ) 12.7 ( $\text{CH}_3$ ), 19.2 ( $\text{CH}_2$ ), 21.1 ( $\text{CH}_2$ ), 26.4 ( $\text{CH}_2$ ), 27.7 ( $\text{CH}_2$ ), 29.6 ( $\text{CH}_2$ ), 38.0 ( $\text{CH}_2$ ), 39.1 ( $\text{CH}_2$ ), 45.2 (CH), 45.4 (CH), 57.9 (CH), 65.4 ( $\text{CH}_2$ ), 66.0 ( $\text{CH}_2$ ), 69.1 (C), 76.3 (CH), 127.9 (CH), 128.0 (CH), 128.4 (CH), 136.1 (C), 174.5 (C).

$m/z$  (EI) 373.2256 ( $\text{C}_{22}\text{H}_{31}\text{NO}_4$  requires  $M^+$  373.2253). 373 ( $M^+$ , 38%), 356 (28), 314 (64), 301 (64), 91 (100).

**(1*S*\*,2'*S*\*,5*S*\*)-7-((2'*S*\*)-3'-(benzyloxycarbonyl)-2'-hydroxybutyl)-1-(hydroxymethyl)-6-azaspiro[4.5]dec-6-ene 6-oxide **21****

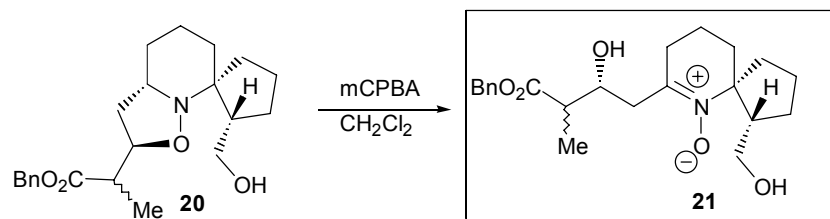

A solution of *m*-CPBA (1.86 g, 10.8 mmol) in dichloromethane (94 mL) was added dropwise over 1 h to a stirred solution of isoxazolidine **20** (2.02 g, 5.41 mmol) in dichloromethane (86 mL) at 0 °C and the reaction mixture stirred for 10 min at this temperature. A mixture of saturated aqueous solutions of sodium thiosulfate:sodium hydrogen carbonate (1:1, 150 mL) was added and the aqueous phase extracted with dichloromethane (3 x 30 mL). The combined organic phases were dried ( $\text{MgSO}_4$ ) and concentrated under reduced pressure and the crude residue purified by column chromatography with 5% methanol-dichloromethane as eluent to afford the nitronium **21** (1.92 g, 91%) as a yellow oil and as a separable 1:1 diastereomeric mixture.

Data for less polar diastereomer:

$\nu_{\max}$  (film)/ $\text{cm}^{-1}$ : 3367, 2942, 2872, 1730, 1655.

$\delta_{\text{H}}$  (300 MHz;  $\text{CDCl}_3$ ;  $\text{Me}_4\text{Si}$ ) 1.27 (3H, d,  $J = 7.0$  Hz,  $\text{CH}_3$ ), 1.42-1.98 (9H, m, H-1, H-2<sub>a</sub>, H-3, H-4<sub>a</sub>, H-9, H-10), 2.19-2.36 (2H, m, H-2<sub>b</sub>, H-1'<sub>a</sub>), 2.36-2.72 (4H, m, H-4<sub>b</sub>, H-3', H-8), 3.04 (1H, dd,  $J = 12.6, 10.2$  Hz, H-1'<sub>b</sub>), 3.68 (2H, d,  $J = 3.6$  Hz,  $\text{CH}_2\text{OH}$ ), 4.22 (1H, ddd,  $J = 10.2, 6.7, 2.5$  Hz, H-2'), 5.13 (2H, d,  $J = 6.6$  Hz,  $\text{CH}_2\text{Ph}$ ), 7.29-7.36 (5H, m, H-Ar).

$\delta_{\text{C}}$  (75 MHz;  $\text{CDCl}_3$ ;  $\text{Me}_4\text{Si}$ ) 12.4 ( $\text{CH}_3$ ), 16.0 ( $\text{CH}_2$ ), 24.0 ( $\text{CH}_2$ ), 28.6 ( $\text{CH}_2$ ), 31.1 ( $\text{CH}_2$ ), 37.0 ( $\text{CH}_2$ ), 38.2 ( $\text{CH}_2$ ), 38.8 ( $\text{CH}_2$ ), 46.4 (CH), 53.1 (CH), 60.2 ( $\text{CH}_2$ ), 65.9 ( $\text{CH}_2$ ), 71.9 (CH), 76.9 (C), 127.9 (CH) (2C), 128.2 (CH), 135.6 (C), 154.3 (C), 174.2 (C).

$m/z$  (EI) 389.2194 ( $\text{C}_{22}\text{H}_{31}\text{NO}_5$  requires  $M^+$  389.2202). 389 ( $M^+$ , 5%), 372 (17), 298 (14), 180 (23), 107 (19), 91 (100), 79 (13).

Data for more polar diastereomer:

$\nu_{\max}$  (film)/ $\text{cm}^{-1}$ : 3394, 2941, 2872, 1731, 1656.

$\delta_{\text{H}}$  (300 MHz;  $\text{CDCl}_3$ ;  $\text{Me}_4\text{Si}$ ) 1.21 (3H, d,  $J = 7.1$  Hz,  $\text{CH}_3$ ), 1.51-1.68 (2H, m, H-3<sub>a</sub>, H-9<sub>a</sub>), 1.68-1.84 (4H, m, H-2<sub>a</sub>, H-4<sub>a</sub>, H-9<sub>b</sub>, H-10<sub>a</sub>), 1.84-2.01 (3H, m, H-1, H-3<sub>b</sub>, H-10<sub>b</sub>), 2.07-2.18 (1H, m, H-2<sub>b</sub>), 2.39-2.49 (3H, m, H-1'<sub>a</sub>, H-8), 2.57-2.75 (2H, m, H-4<sub>b</sub>, H-3'), 2.92 (1H, dd,  $J = 12.6, 10.5$  Hz, H-1'<sub>b</sub>), 3.63-3.74 (2H, m,  $\text{CH}_2\text{OH}$ ), 4.27 (1H, ddd,  $J = 10.5, 6.4, 2.3$  Hz, H-2'), 5.14 (2H, d,  $J = 5.2$ ,  $\text{CH}_2\text{Ph}$ ), 7.27-7.36 (5H, m, H-Ar).

$\delta_{\text{C}}$  (75 MHz;  $\text{CDCl}_3$ ;  $\text{Me}_4\text{Si}$ ) 11.9 ( $\text{CH}_3$ ), 15.9 ( $\text{CH}_2$ ), 23.9 ( $\text{CH}_2$ ), 28.6 ( $\text{CH}_2$ ), 31.1 ( $\text{CH}_2$ ), 36.8 ( $\text{CH}_2$ ), 37.1 ( $\text{CH}_2$ ), 38.6 ( $\text{CH}_2$ ), 46.2 (CH), 52.9 (CH), 60.2 ( $\text{CH}_2$ ), 65.6 ( $\text{CH}_2$ ), 71.6 (CH), 76.6 (C), 127.6 (CH), (2C), 128.0 (CH), 135.5 (C), 154.1 (C), 173.9 (C).

$m/z$  (EI) 389.2207 ( $\text{C}_{22}\text{H}_{31}\text{NO}_5$  requires  $M^+$  389.2202). 389 ( $M^+$ , 4%), 372 (11), 298 (11), 180 (21), 107 (19), 91 (100), 79 (13).

**(1*S*\*,5*S*\*,7*R*\*)-7-((2'*S*\*)-3'-(benzyloxycarbonyl)-2'-hydroxybutyl)-1-(hydroxymethyl)-6-hydroxyazaspiro[4.5]decan-6-ol 22**

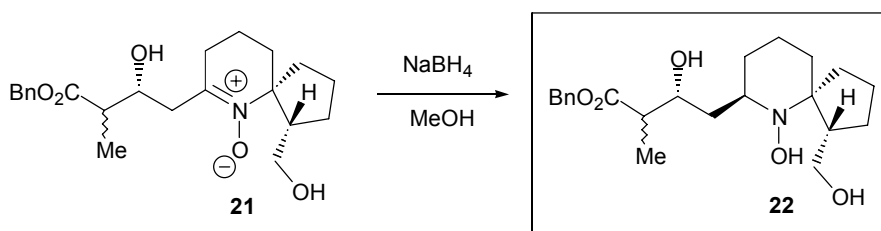

Sodium borohydride (0.75 g, 19.8 mmol) was added to a stirred solution of nitrone **21** (2.60 g, 6.62 mmol) in methanol (165 mL) at 0 °C. The reaction mixture was then warmed to room temperature and stirred for a further 30 min. The reaction mixture was concentrated under reduced pressure and the residue diluted with ethyl acetate (80 mL) and aqueous brine (120 mL) added. The layers were separated and the aqueous phase further extracted with ethyl acetate (3 x 50 mL). The combined organic phases were dried ( $\text{MgSO}_4$ ) and concentrated and the crude residue purified by column chromatography with 35% ethyl acetate-hexane as eluent to afford *N*-hydroxyazaspiro[4.5]decan-6-ol **22** (1.76 g, 68%) as a yellow oil and as a separable 1:1 diastereomeric mixture.

Data for less polar diastereomer:

$\nu_{\max}$  (film)/ $\text{cm}^{-1}$ : 3320, 2940, 2878, 1732, 1647.

$\delta_{\text{H}}$  (300 MHz;  $\text{CDCl}_3$ ;  $\text{Me}_4\text{Si}$ ) 0.96-1.12 (2H, m, H-1'<sub>a</sub>, H-8<sub>a</sub>), 1.12-1.27 (1H, m, H-10<sub>a</sub>), 1.23 (3H, d,  $J = 6.9$  Hz,  $\text{CH}_3$ ), 1.38-1.68 (5H, m, H-3, H-4<sub>a</sub>, H-9), 1.68-2.08 (7H, m, H-1, H-2, H-1'<sub>b</sub>, H-4<sub>b</sub>, H-8<sub>b</sub>, H-10<sub>b</sub>), 2.48 (1H, dq,  $J = 7.3, 6.9$  Hz, H-3'), 2.91 (1H, br t,  $J = 11.3$  Hz, H-7), 3.37 (1H, dd,  $J = 10.3, 2.3$ ,  $\text{CH}_a\text{CH}_b\text{OH}$ ), 3.70 (1H, d,  $J = 10.3$ ,  $\text{CH}_a\text{CH}_b\text{OH}$ ), 4.04 (1H, dd,  $J = 9.4, 7.3$ , H-2'), 5.11 (2H, s,  $\text{CH}_2\text{Ph}$ ), 7.25-7.40 (5H, m, H-Ar).

$\delta_{\text{C}}$  (75 MHz;  $\text{CDCl}_3$ ;  $\text{Me}_4\text{Si}$ ) 12.6 ( $\text{CH}_3$ ), 20.2 ( $\text{CH}_2$ ), 20.8 ( $\text{CH}_2$ ), 23.6 ( $\text{CH}_2$ ), 26.2 ( $\text{CH}_2$ ), 26.6 ( $\text{CH}_2$ ), 29.5 ( $\text{CH}_2$ ), 34.8 ( $\text{CH}_2$ ), 46.1 (CH), 50.2 (CH), 61.2 (CH), 64.4 ( $\text{CH}_2$ ), 65.8 ( $\text{CH}_2$ ), 71.1 (C), 74.8 (CH), 127.9 (CH) (2C), 128.2 (CH), 135.9 (C), 174.6 (C).

$m/z$  (EI) 391.2358 ( $\text{C}_{22}\text{H}_{33}\text{NO}_5$  requires  $\text{M}^+$  391.2358). 391 ( $\text{M}^+$ , 26%), 374 (10), 332 (9), 319 (10), 300 (44), 91 (100), 79 (14), 67 (14), 55 (20), 41 (22).

Data for more polar diastereomer:

$\nu_{\max}$  (film)/ $\text{cm}^{-1}$ : 3389, 2939, 2878, 1732, 1644.

$\delta_{\text{H}}$  (300 MHz;  $\text{CDCl}_3$ ;  $\text{Me}_4\text{Si}$ ) 0.98-1.09 (1H, m, H-8<sub>a</sub>), 1.12 (3H, d,  $J = 7.1$  Hz,  $\text{CH}_3$ ), 1.14-1.27 (2H, m, H-1'<sub>a</sub>, H-10<sub>a</sub>), 1.36-1.67 (5H, m, H-3, H-4<sub>a</sub>, H-9), 1.67-2.18 (7H, m, H-1, H-2, H-1'<sub>b</sub>, H-4<sub>b</sub>, H-8<sub>b</sub>, H-10<sub>b</sub>), 2.58 (1H, q,  $J = 7.1$  Hz, H-3'), 2.92 (1H, br t,  $J = 11.1$  Hz, H-7), 3.37 (1H, dd,  $J = 10.1, 2.1$  Hz,  $\text{CH}_a\text{H}_b\text{OH}$ ), 3.68 (1H, d,  $J = 10.1$  Hz,  $\text{CH}_a\text{H}_b\text{OH}$ ), 4.10 (1H, dd,  $J = 9.4, 7.1$  Hz, H-2'), 5.14 (2H, d,  $J = 5.4$ ,  $\text{CH}_2\text{Ph}$ ), 7.24-7.44 (5H, m, H-Ar).

$\delta_{\text{C}}$  (75 MHz;  $\text{CDCl}_3$ ;  $\text{Me}_4\text{Si}$ ) 12.5 ( $\text{CH}_3$ ), 20.2 ( $\text{CH}_2$ ), 20.8 ( $\text{CH}_2$ ), 23.8 ( $\text{CH}_2$ ), 26.2 ( $\text{CH}_2$ ), 26.6 ( $\text{CH}_2$ ), 29.5 ( $\text{CH}_2$ ), 33.1 ( $\text{CH}_2$ ), 45.9 (CH), 50.1 (CH), 61.2 (CH), 64.3 ( $\text{CH}_2$ ), 65.8 ( $\text{CH}_2$ ), 71.1 (C), 75.0 (CH), 127.8 (CH) (2C), 128.2 (CH), 136.0 (C), 174.8 (C).

$m/z$  (EI) 391.2355 ( $\text{C}_{22}\text{H}_{33}\text{NO}_5$  requires  $\text{M}^+$  391.2358). 391 ( $\text{M}^+$ , 23%), 374 (9), 332 (7), 319 (9), 300 (35), 91 (100), 79 (15), 67 (15), 55 (23), 41 (27).

**(1*S*\*,5*S*\*,7*R*\*)-7-((2'*S*\*)-3'-(benzyloxycarbonyl)-2'-hydroxybutyl)-1-(hydroxymethyl)-6-azaspiro[4.5]decane 23**

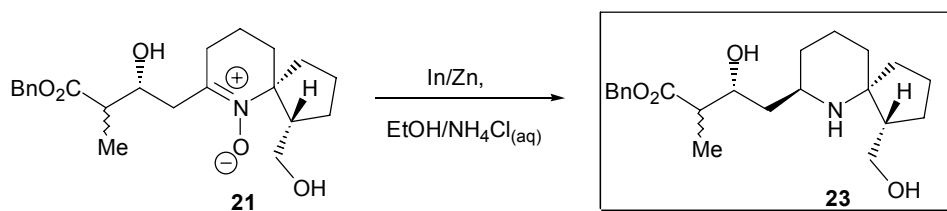

A solution of hydroxylamine **22** (1.76 g, 4.49 mmol) in ethanol (85 mL) was transferred *via* cannula to a flask containing indium powder (0.025 g, 0.22 mmol) and zinc powder (0.73 g, 11.2 mmol). Saturated aqueous ammonium chloride (8.9 mL) was added and the reaction mixture was stirred under reflux for 4 h. The reaction mixture was cooled to room temperature, filtered through a pad of Celite<sup>®</sup> and the filtrate concentrated. Ethyl acetate (50 mL) and saturated aqueous sodium bicarbonate (50 mL) were added to the residue and the layers separated. The aqueous phase was further extracted with ethyl acetate (3 x 30 mL) and the combined organic phases dried ( $\text{MgSO}_4$ ) and concentrated. The crude residue was purified by column chromatography with 5% methanol-dichloromethane as eluent

to afford azaspiro[4.5]decane **23** (1.68 g, 100%) as a yellow oil and as a separable 1:1 diastereomeric mixture.

Data for less polar diastereomer:

$\nu_{\max}$  (film)/ $\text{cm}^{-1}$ : 3394, 2933, 2864, 1731, 1648.

$\delta_{\text{H}}$  (300 MHz;  $\text{CDCl}_3$ ;  $\text{Me}_4\text{Si}$ ) 0.92-1.06 (1H, m, H-8<sub>a</sub>), 1.22 (3H, d,  $J = 7.0$  Hz,  $\text{CH}_3$ ), 1.25-1.61 (9H, m, H-2<sub>a</sub>, H-1', H-3<sub>a</sub>, H-8<sub>b</sub>, H-9, H-10), 1.61-1.84 (5H, m, H-1, H-2<sub>b</sub>, H-3<sub>b</sub>, H-4), 2.48 (1H, dq,  $J = 7.0, 6.7$  Hz, H-3'), 2.77-2.89 (1H, m, H-7), 3.35-3.82 (2H, m,  $\text{CH}_2\text{OH}$ ), 4.01 (1H, ddd,  $J = 9.6, 6.7, 3.0$  Hz, H-2'), 5.13 (2H, s,  $\text{CH}_2\text{Ph}$ ), 7.27-7.36 (5H, m, H-Ar).

$\delta_{\text{C}}$  (75 MHz;  $\text{CDCl}_3$ ;  $\text{Me}_4\text{Si}$ ) 12.9 ( $\text{CH}_3$ ), 22.1 ( $\text{CH}_2$ ), 22.7 ( $\text{CH}_2$ ), 27.2 ( $\text{CH}_2$ ), 33.1 ( $\text{CH}_2$ ), 35.5 ( $\text{CH}_2$ ), 36.7 ( $\text{CH}_2$ ), 40.1 ( $\text{CH}_2$ ), 46.1 (CH), 51.0 (CH), 52.5 (CH), 62.7 ( $\text{CH}_2$ ), 63.1 (C), 66.0 ( $\text{CH}_2$ ), 73.4 (CH), 128.0 (CH) (2C), 128.4 (CH), 135.9 (C), 175.0 (C).

$m/z$  (FAB) 376.2487 ( $\text{C}_{22}\text{H}_{34}\text{NO}_4$  requires  $\text{MH}^+$  376.2487). 376 ( $\text{MH}^+$ , 73%), 154 (100), 136 (71), 107 (25), 91 (30), 77 (24):

Data for more polar diastereomer:

$\nu_{\max}$  (film)/ $\text{cm}^{-1}$ : 3400, 2934, 2864, 1734, 1647.

$\delta_{\text{H}}$  (300 MHz;  $\text{CDCl}_3$ ;  $\text{Me}_4\text{Si}$ ) 0.96-1.10 (1H, m, H-8<sub>a</sub>), 1.13 (3H, d,  $J = 7.1$  Hz,  $\text{CH}_3$ ), 1.18-1.32 (1H, m, H-1'<sub>a</sub>), 1.32-1.55 (4H, m, H-2<sub>a</sub>, H-1'<sub>b</sub>, H-3<sub>a</sub>, H-10<sub>a</sub>), 1.55-1.84 (9H, m, H-1, H-2<sub>b</sub>, H-3<sub>b</sub>, H-4, H-8<sub>b</sub>, H-9, H-10<sub>b</sub>), 2.54 (1H, dq,  $J = 7.1, 7.0$  Hz, H-3'), 2.78-2.86 (1H, m, H-7), 3.59-3.72 (2H, m,  $\text{CH}_2\text{OH}$ ), 3.99 (1H, ddd, 10.6, 7.0, 2.1 Hz, H-2'), 5.14 (2H, s,  $\text{CH}_2\text{Ph}$ ), 7.26-7.35 (5H, m, H-Ar).

$\delta_{\text{C}}$  (75 MHz;  $\text{CDCl}_3$ ;  $\text{Me}_4\text{Si}$ ) 12.9 ( $\text{CH}_3$ ), 22.1 ( $\text{CH}_2$ ), 22.7 ( $\text{CH}_2$ ), 27.2 ( $\text{CH}_2$ ), 33.2 ( $\text{CH}_2$ ), 35.5 ( $\text{CH}_2$ ), 36.7 ( $\text{CH}_2$ ), 39.3 ( $\text{CH}_2$ ), 46.3 (CH), 51.1 (CH), 52.3 (CH), 62.6 ( $\text{CH}_2$ ), 63.0 (C), 65.9 ( $\text{CH}_2$ ), 74.0 (CH), 127.9 (CH) (2C), 128.3 (CH), 135.9 (C), 174.9 (C).

$m/z$  (FAB) 376.2489 ( $\text{C}_{22}\text{H}_{34}\text{NO}_4$  requires  $\text{MH}^+$  376.2487). 376 ( $\text{MH}^+$ , 100%), 154 (35), 136 (26), 107 (10), 91 (44), 77 (11).

**(1*S*\*,5*S*\*,7*R*\*)-7-((2'*S*\*)-3'-(benzyloxycarbonyl)-2'-hydroxybutyl)-1-(*tert*-butyldimethylsilyloxymethyl)-6-azaspiro[4.5]decane **24****

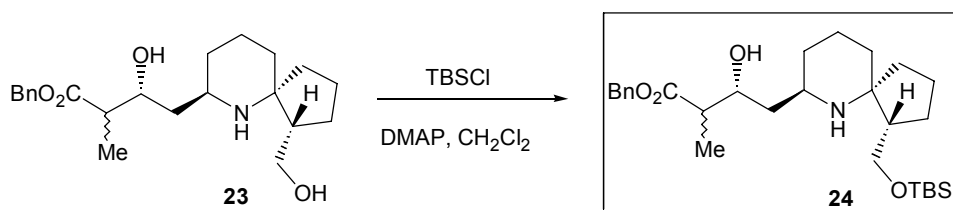

*tert*-Butyldimethylsilyl chloride (0.64 g, 4.29 mmol) was added to a stirred solution of alcohol **23** (1.34 g, 3.57 mmol), triethylamine (2.97 mL, 21.4 mmol) and DMAP (0.04 g, 0.36 mmol) in dichloromethane (30 mL) at 0 °C. The reaction mixture was warmed to room temperature and stirred for 24 h. Water (40 mL) was added and the aqueous phase extracted with dichloromethane (3 x 20 mL). The combined organic phases were dried ( $\text{MgSO}_4$ ) and concentrated and the crude residue purified by column chromatography with 1% methanol-dichloromethane as eluent to afford the silyl ether **24** (1.55 g, 89%) as a yellow oil and as a separable 1:1 diastereomeric mixture.

Data for less polar diastereomer:

$\nu_{\max}$  (film)/ $\text{cm}^{-1}$ : 3444, 2930, 2858, 1732, 1460, 1257, 1100, 1074.

$\delta_{\text{H}}$  (300 MHz;  $\text{CDCl}_3$ ;  $\text{Me}_4\text{Si}$ ) 0.06 (3H, s,  $(\text{CH}_3)_2\text{Si}$ ), 0.07 (3H, s,  $(\text{CH}_3)_2\text{Si}$ ), 0.90 (9H, s,  $\text{C}(\text{CH}_3)_3\text{Si}$ ), 1.23 (3H, d,  $J = 7.0$  Hz,  $\text{CH}_3$ ), 1.29-1.40 (1H, m, H-2<sub>a</sub>), 1.40-1.52 (4H, m, H-1', H-3<sub>a</sub>, H-10<sub>a</sub>), 1.52-1.59 (2H, m, H-8), 1.59-1.82 (8H, m, H-1, H-2<sub>b</sub>, H-3<sub>b</sub>, H-4, H-9, H-10<sub>b</sub>), 2.46 (1H, dq,  $J = 7.0, 6.7$  Hz, H-3'), 2.88 (1H, br s, H-7), 3.62-3.81 (2H, m,  $\text{CH}_2\text{OTBS}$ ), 3.98-4.11 (1H, m, H-2'), 5.13 (2H, s,  $\text{CH}_2\text{Ph}$ ), 7.28-7.43 (5H, m, H-Ar).

$\delta_{\text{C}}$  (75 MHz;  $\text{CDCl}_3$ ;  $\text{Me}_4\text{Si}$ ) -5.6 ( $\text{CH}_3$ ), 12.4 ( $\text{CH}_3$ ), 18.0 (C), 22.0 ( $\text{CH}_2$ ), 23.5 ( $\text{CH}_2$ ), 25.8 ( $\text{CH}_3$ ), 27.7 ( $\text{CH}_2$ ), 33.4 ( $\text{CH}_2$ ), 36.0 ( $\text{CH}_2$ ), 37.2 ( $\text{CH}_2$ ), 39.6 ( $\text{CH}_2$ ), 46.5 (CH), 51.4 (CH), 53.2 (CH), 62.7 (C), 63.3 ( $\text{CH}_2$ ), 65.9 ( $\text{CH}_2$ ), 73.7 (CH), 128.0 (CH), 128.4 (CH) (2C), 136.1 (C), 174.9 (C).

$m/z$  (EI) 489.3271 ( $\text{C}_{28}\text{H}_{47}\text{NO}_4\text{Si}$  requires  $\text{M}^+$  489.3274). (489 ( $\text{M}^+$ , 54%), 474 (8), 446 (33), 432 (26), 326 (57), 316 (54), 303 (31), 283 (38), 169 (25), 91 (100), 73 (37)).

Data for more polar diastereomer:

$\nu_{\max}$  (film)/ $\text{cm}^{-1}$ : 3272, 2928, 2857, 1734, 1461, 1252, 1170, 1070.

$\delta_{\text{H}}$  (400 MHz;  $\text{CDCl}_3$ ;  $\text{Me}_4\text{Si}$ ) 0.06 (6H, s,  $(\text{CH}_3)_2\text{Si}$ ), 0.91 (9H, s,  $\text{C}(\text{CH}_3)_3\text{Si}$ ), 0.91-1.01 (1H, m, H-8<sub>a</sub>), 1.12 (3H, d,  $J = 7.0$ ,  $\text{CH}_3$ ), 1.18-1.33 (2H, m, H-2<sub>a</sub>, H-1'<sub>a</sub>), 1.33-1.45 (2H, m, H-3<sub>a</sub>, H-10<sub>a</sub>), 1.45-1.73 (8H, m, H-2<sub>b</sub>, H-1'<sub>b</sub>, H-3<sub>b</sub>, H-4<sub>a</sub>, H-8<sub>b</sub>, H-9, H-10<sub>b</sub>), 1.73-1.82 (2H, m, H-1, H-4<sub>b</sub>), 2.58 (1H, d,  $J = 7.0, 6.9$  Hz, H-3'), 2.82 (1H, br s, H-7), 3.68 (2H, br d,  $J = 8.0$  Hz,  $\text{CH}_2\text{OTBS}$ ), 4.11 (1H, ddd,  $J = 10.4, 6.9, 1.5$  Hz, H-2'), 5.14 (2H, s,  $\text{CH}_2\text{Ph}$ ), 7.21-7.43 (5H, m, H-Ar).

$\delta_{\text{C}}$  (100 MHz;  $\text{CDCl}_3$ ;  $\text{Me}_4\text{Si}$ ) -5.7 ( $\text{CH}_3$ ), 11.9 ( $\text{CH}_3$ ), 17.7 (C), 22.2 ( $\text{CH}_2$ ), 23.4 ( $\text{CH}_2$ ), 25.6 ( $\text{CH}_3$ ), 27.6 ( $\text{CH}_2$ ), 33.7 ( $\text{CH}_2$ ), 36.1 ( $\text{CH}_2$ ), 37.3 ( $\text{CH}_2$ ), 38.1 ( $\text{CH}_2$ ), 46.2 (CH), 51.4 (CH), 52.8 (CH), 62.1 (C), 63.1 ( $\text{CH}_2$ ), 65.6 ( $\text{CH}_2$ ), 74.1 (CH), 127.6 (CH), 127.8 (CH), 128.1 (CH), 136.0 (C), 174.5 (C).

$m/z$  (EI) 489.3282 ( $\text{C}_{28}\text{H}_{47}\text{NO}_4\text{Si}$  requires  $\text{M}^+$  489.3274) 489 ( $\text{M}^+$ , 31%), 474 (4), 446 (25), 432 (11), 326 (22), 316 (27), 303 (20), 282 (19), 169 (20), 91 (100), 73 (30).

**(1*S*\*,5*S*\*,7*R*\*)-7-((*E*)-3'-(benzyloxycarbonyl)but-2'-enyl)-1-(*tert*-butyldimethylsilyloxymethyl)-6-azaspiro[4.5]decane 25**

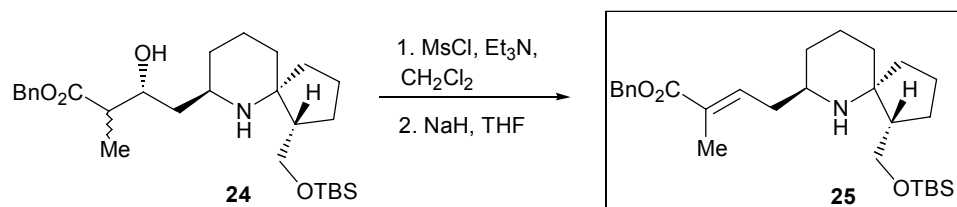

Mesyl chloride (0.15 mL, 1.95 mmol) was added dropwise to a stirred solution of alcohol **24** (0.32 g, 0.65 mmol) and triethylamine (0.45 mL, 3.24 mmol) in dichloromethane (20 mL) at 0 °C. The reaction mixture was stirred for 15 min at this temperature then warmed to room temperature and stirred for a further 3 h. Water (20 mL) was added and the aqueous phase extracted with dichloromethane (3 x 10 mL). The combined organic phases were dried ( $\text{MgSO}_4$ ) and concentrated under reduced pressure to give an orange oil. The crude residue was dissolved in tetrahydrofuran (23 mL) and added to a flask containing a 60% dispersion of sodium hydride in mineral oil (0.11 g, 4.71 mmol) at 0 °C. The reaction mixture

was warmed to room temperature and stirred for 3 days. Water (25 mL) was added and the aqueous phase extracted with ethyl acetate (3 x 10 mL). The combined organic phases were dried (MgSO<sub>4</sub>) and concentrated and the crude residue purified by column chromatography with 1% methanol-dichloromethane (1:99) as eluent to afford (*E*)-alkene **25** (0.26 g, 85% over two steps) as a yellow oil.

$\nu_{\max}$  (film)/cm<sup>-1</sup>: 3426, 3034, 2928, 2857, 1713, 1650, 1462, 1255, 1074.

$\delta_{\text{H}}$  (400 MHz; CDCl<sub>3</sub>; Me<sub>4</sub>Si) 0.14 (6H, s, (CH<sub>3</sub>)<sub>2</sub>Si), 0.99 (9H, s, C(CH<sub>3</sub>)<sub>3</sub>Si), 1.04-1.18 (1H, m, H-8<sub>a</sub>), 1.41-1.68 (6H, m, H-2<sub>a</sub>, H-3<sub>a</sub>, H-4<sub>a</sub>, H-9<sub>a</sub>, H-10), 1.68-1.90 (6H, m, H-1, H-2<sub>b</sub>, H-3<sub>b</sub>, H-4<sub>b</sub>, H-8<sub>b</sub>, H-9<sub>b</sub>), 1.98 (3H, s, CH<sub>3</sub>), 2.23-2.53 (2H, m, H-1'), 2.89 (1H, br s, H-7), 3.78-3.94 (2H, m, CH<sub>2</sub>OTBS), 5.28 (2H, s, CH<sub>2</sub>Ph), 6.93 (1H, t, *J* = 7.3 Hz, H-2'), 7.38-7.52 (5H, m, H-Ar).

$\delta_{\text{C}}$  (100 MHz; CDCl<sub>3</sub>; Me<sub>4</sub>Si) -5.5 (CH<sub>3</sub>), 12.6 (CH<sub>3</sub>), 18.0 (C), 22.0 (CH<sub>2</sub>), 22.6 (CH<sub>2</sub>), 25.8 (CH<sub>3</sub>), 27.7 (CH<sub>2</sub>), 32.4 (CH<sub>2</sub>), 35.5 (CH<sub>2</sub>), 36.5 (CH<sub>2</sub>), 36.8 (CH<sub>2</sub>), 51.6 (CH) (2C), 63.4 (CH<sub>2</sub>), 64.2 (C), 66.1 (CH<sub>2</sub>), 127.8 (CH), 127.9 (CH), 128.4 (CH), 129.0 (C), 136.3 (C), 139.7 (CH), 167.6 (C).

*m/z* (EI) 471.3168 (C<sub>28</sub>H<sub>45</sub>NO<sub>3</sub>Si requires M<sup>+</sup> 471.3168). 471 (M<sup>+</sup>, 2%), 456 (2), 428 (4), 414 (3), 282 (100), 224 (6), 150 (12), 91 (31), 73 (13).

## 2-phenyl-5-[1'-(phenylseleno)ethyl]-1,3-dioxane **32**

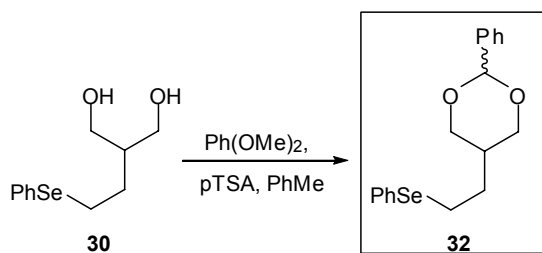

A solution of benzaldehyde dimethyl acetal (1.67 mL, 11.2 mmol) in toluene (20 mL) was added to a stirred solution of diol **30** (2.62 g, 10.1 mmol) and *para*-toluene sulfonic acid (0.09 g, 0.5 mmol). The reaction mixture was heated under reflux using a Dean-Stark trap for 6 h then cooled to room temperature. Potassium carbonate (1.5 g) was added and the mixture stirred for a further 24 h then filtered through a pad of Celite<sup>®</sup>. The filtrate was concentrated and the crude residue purified by column chromatography with 3% ethyl acetate-hexane as eluent to afford acetal **32** (3.51 g, 100%) as a yellow oil and a diastereomeric mixture.

$\nu_{\max}$  (film)/cm<sup>-1</sup>: 3067, 2960, 2929, 2844, 1578, 1386, 1136, 1073.

$\delta_{\text{H}}$  (300 MHz; CDCl<sub>3</sub>; Me<sub>4</sub>Si)  $\delta_{\text{H}}$  (300 MHz; CDCl<sub>3</sub>; Me<sub>4</sub>Si) 1.39-1.51 (1H, m, CH<sub>a</sub>H<sub>b</sub>CH<sub>2</sub>SePh), 1.54-1.63 (0.5H, m, H-5), 2.13-2.34 (1.5H, m, H-5\*, CH<sub>a</sub>H<sub>b</sub>CH<sub>2</sub>SePh), 2.78-2.87 (1H, m, H-CH<sub>a</sub>H<sub>b</sub>SePh), 3.02 (1H, t, *J* = 7.4 Hz, CH<sub>a</sub>H<sub>b</sub>SePh), 3.48 (1H, t, *J* = 11.6 Hz, H-4<sub>a</sub>), 3.99-4.04 (2H, m, H-4\*), 4.19 (1H, dd, *J* = 11.6, 4.6 Hz, H-4<sub>b</sub>), 5.35 (0.5H, s, H-2), 5.45 (0.5H, s, H-2\*), 7.18-7.56 (10H, m, H-Ar).

$\delta_{\text{C}}$  (75 MHz; CDCl<sub>3</sub>; Me<sub>4</sub>Si) 24.2 (CH<sub>2</sub>), 25.6 (CH<sub>2</sub>\*), 28.7 (CH<sub>2</sub>), 29.4 (CH<sub>2</sub>\*), 33.8 (CH<sub>2</sub>), 34.3 (CH<sub>2</sub>\*), 70.0 (CH<sub>2</sub>) (2C), 71.7 (CH<sub>2</sub>\*) (2C), 101.3 (CH\*), 101.8 (CH), 125.9 (CH), 126.7 (CH), 126.9 (CH), 128.1 (CH), 128.7 (CH) (2C), 128.9 (CH), 129.0 (CH), 129.5 (C), 130.0 (C), 132.4 (CH), 132.7 (CH), 138.2 (C), 138.4 (C).



*m/z* (EI) 348.0629 ( $M^+$   $C_{18}H_{20}O_2$   $^{80}Se$  requires 348.0628). ( $M^+$ , 67%), 191 (68), 105 (100), 91 (68), 77 (53), 55 (95).

# A Concise Approach to the Core Structures of Pinnaic Acid and Halichlorine

Sung-Hyun Yang,<sup>a</sup> G. R. Clark<sup>a</sup> and Vittorio Caprio\*<sup>a</sup>

<sup>a</sup> *Department of Chemistry, University of Auckland, 23 Symonds Street, Auckland, New Zealand.*

For corresponding author:

V.Caprio

Mailing address: As above

Tel: 0064 9 3737599

Fax: 0064 9 3737422

Email: [v.caprio@auckland.ac.nz](mailto:v.caprio@auckland.ac.nz)

Supporting Information:

Contents

*<sup>1</sup>H and <sup>13</sup>C NMR spectra for all new compounds, pp2-81*

Current Data Parameters  
 NAME VSHR6B  
 EPRNO 1  
 PRICNO 1  
 F2 - Acquisition Parameters  
 Date 20060816  
 Time 15:45  
 INSTRUM spect  
 PROBHD 5 mm Dui 13C/  
 PULPROG zgpg30  
 TO 32768  
 SOLVENT CDCl3  
 DS 64  
 SWH 4194.631 Hz  
 FIDRES 0.128010 Hz  
 AQ 3.6059956 sec  
 RG 161.3  
 DM 119.200 usec  
 DE 6.50 usec  
 TE 300.0 K  
 D1 0.1000000 sec  
 \*\*\*\*\* CHANNEL f1 \*\*\*\*\*  
 NUC1 1H  
 P1 10.00 usec  
 PL1 0.00 dB  
 SF01 400.131906 MHz  
 F2 - Processing parameters  
 SI 6334  
 SF 400.130053 MHz  
 MCW EM  
 SSB 0  
 LB 0.10 Hz  
 GB 0  
 BB 0  
 PC 1.00  
 10 NMR plot parameters  
 CX 22.00 cm  
 CY 11.48 cm  
 F1P 7.505 ppm  
 F1 3163.17 Hz  
 F2P -0.389 ppm  
 F2 159.83 Hz  
 GAMMA 0.3910000 rad/cm  
 HZCM 150.86372 Hz/cm

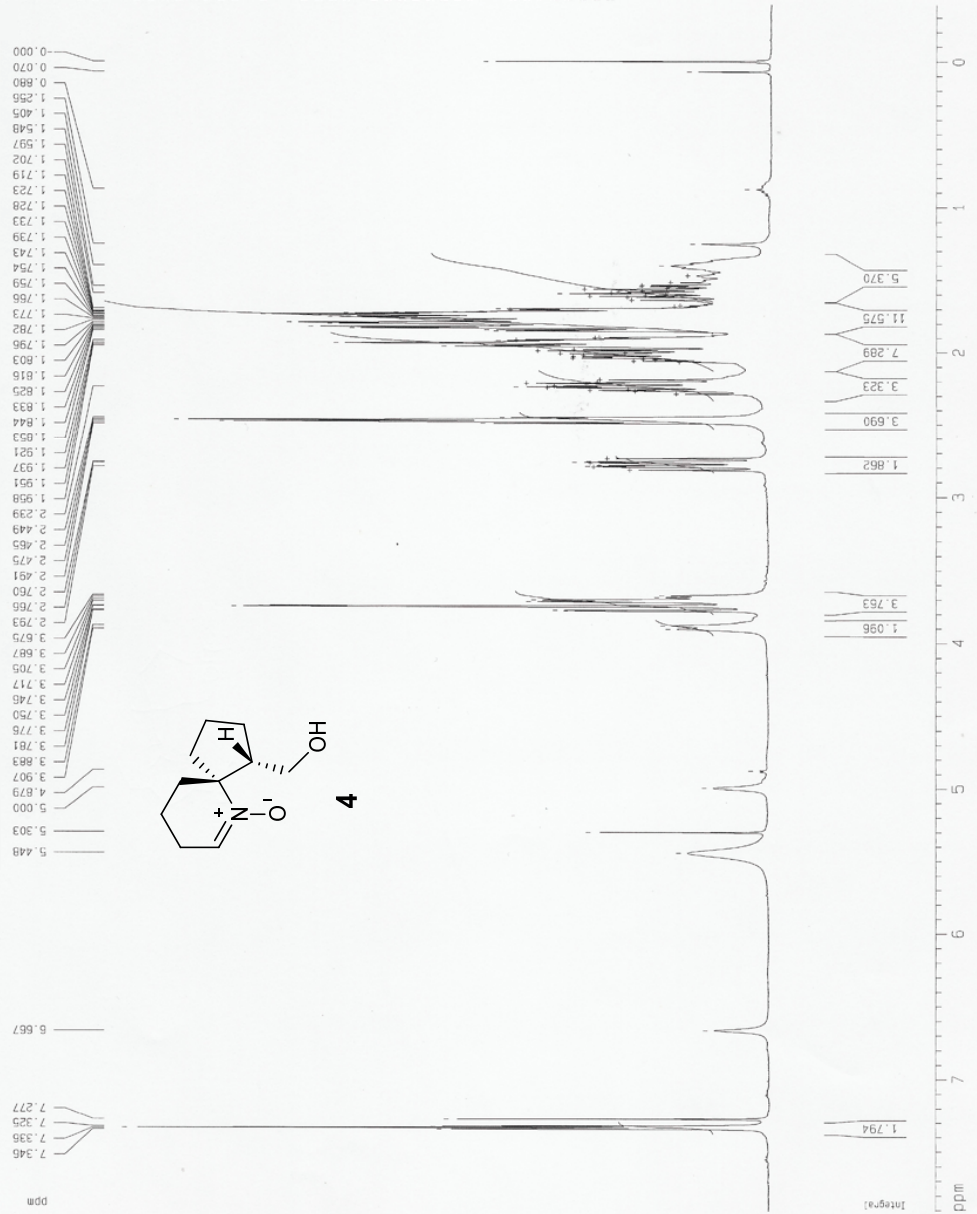

Current Data Parameters  
 NAME YSHR31  
 EXPNO 2  
 PROCNO 1

F2 - Acquisition Parameters  
 Date\_ 20040609  
 Time 11.21  
 INSTRUM spect  
 PROBHD 5 mm QNP 1H/13  
 PULPROG zgpg  
 TD 65536  
 SOLVENT CDCl3  
 NS 200  
 DS 0  
 SWH 17985.611 Hz  
 FIDRES 0.274438 Hz  
 AQ 1.8219508 sec  
 RG 16384  
 DM 27.800 usec  
 DE 20.00 usec  
 TE 300.0 K  
 D1 0.17593171 sec  
 d11 0.03000000 sec  
 d12 0.00020000 sec

===== CHANNEL f1 =====  
 NUC1 13C  
 P1 5.44 usec  
 PL1 4.00 dB  
 SF01 75.4760973 MHz

===== CHANNEL f2 =====  
 CPDPRG2 waltz16  
 NUC2 1H  
 PCPD2 102.00 usec  
 PL2 120.00 dB  
 PL12 20.20 dB  
 PL13 25.80 dB  
 SF02 300.1312005 MHz

F2 - Processing parameters  
 SI 32768  
 SF 75.4677515 MHz  
 KDM EM  
 SSB 0  
 LB 1.00 Hz  
 GB 0  
 PC 1.00

ID NMR plot parameters  
 CX 22.00 cm  
 CY 12.10 cm  
 F1P 147.229 ppm  
 F1 11111.02 Hz  
 F2P -2.020 ppm  
 F2 -152.47 Hz  
 PPKCM 6.78405 ppm/cm  
 -ZCM 511.97681 Hz/cm

141.619  
 77.535  
 77.426  
 77.002  
 76.579  
 66.019  
 61.169  
 52.826  
 38.613  
 37.131  
 28.241  
 26.430  
 24.059  
 17.424  
 15.937  
 15.563

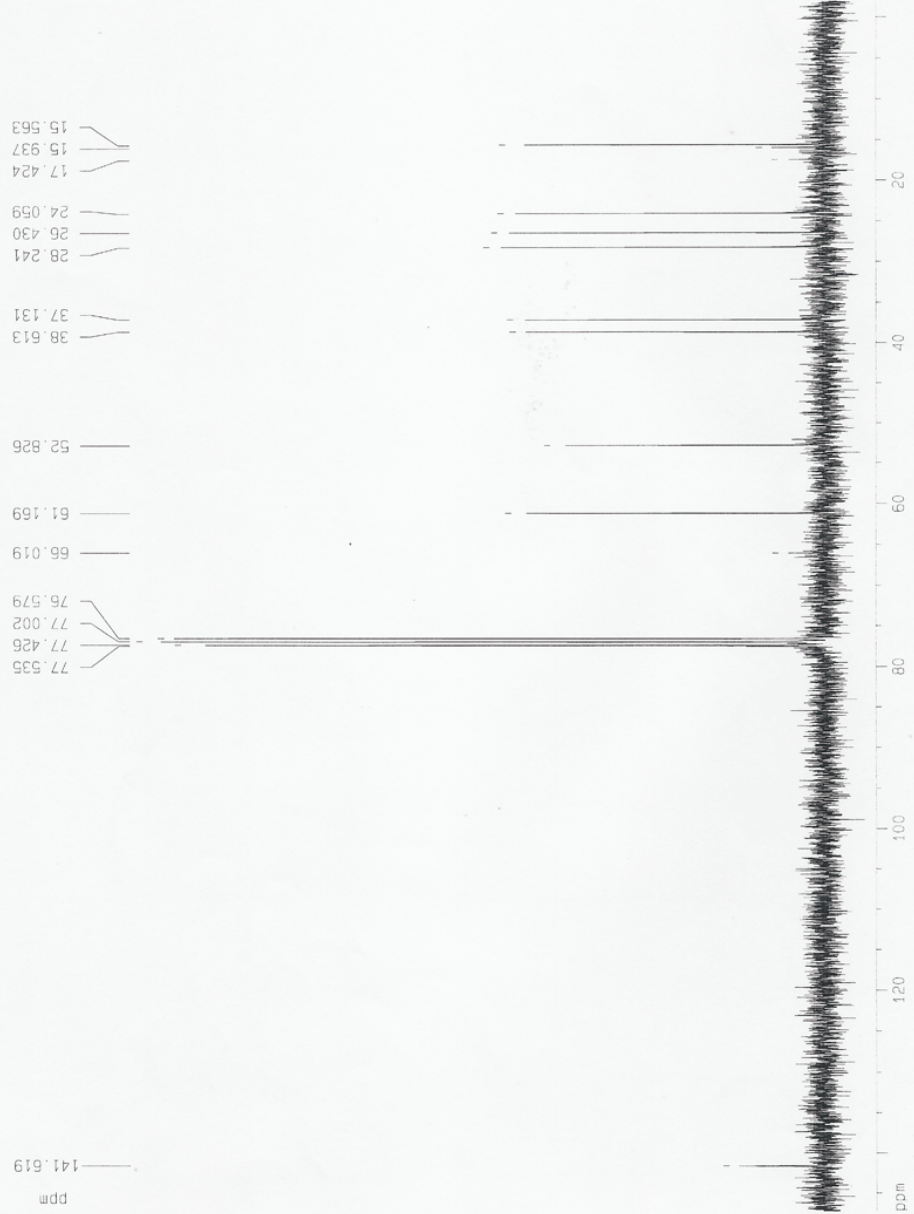

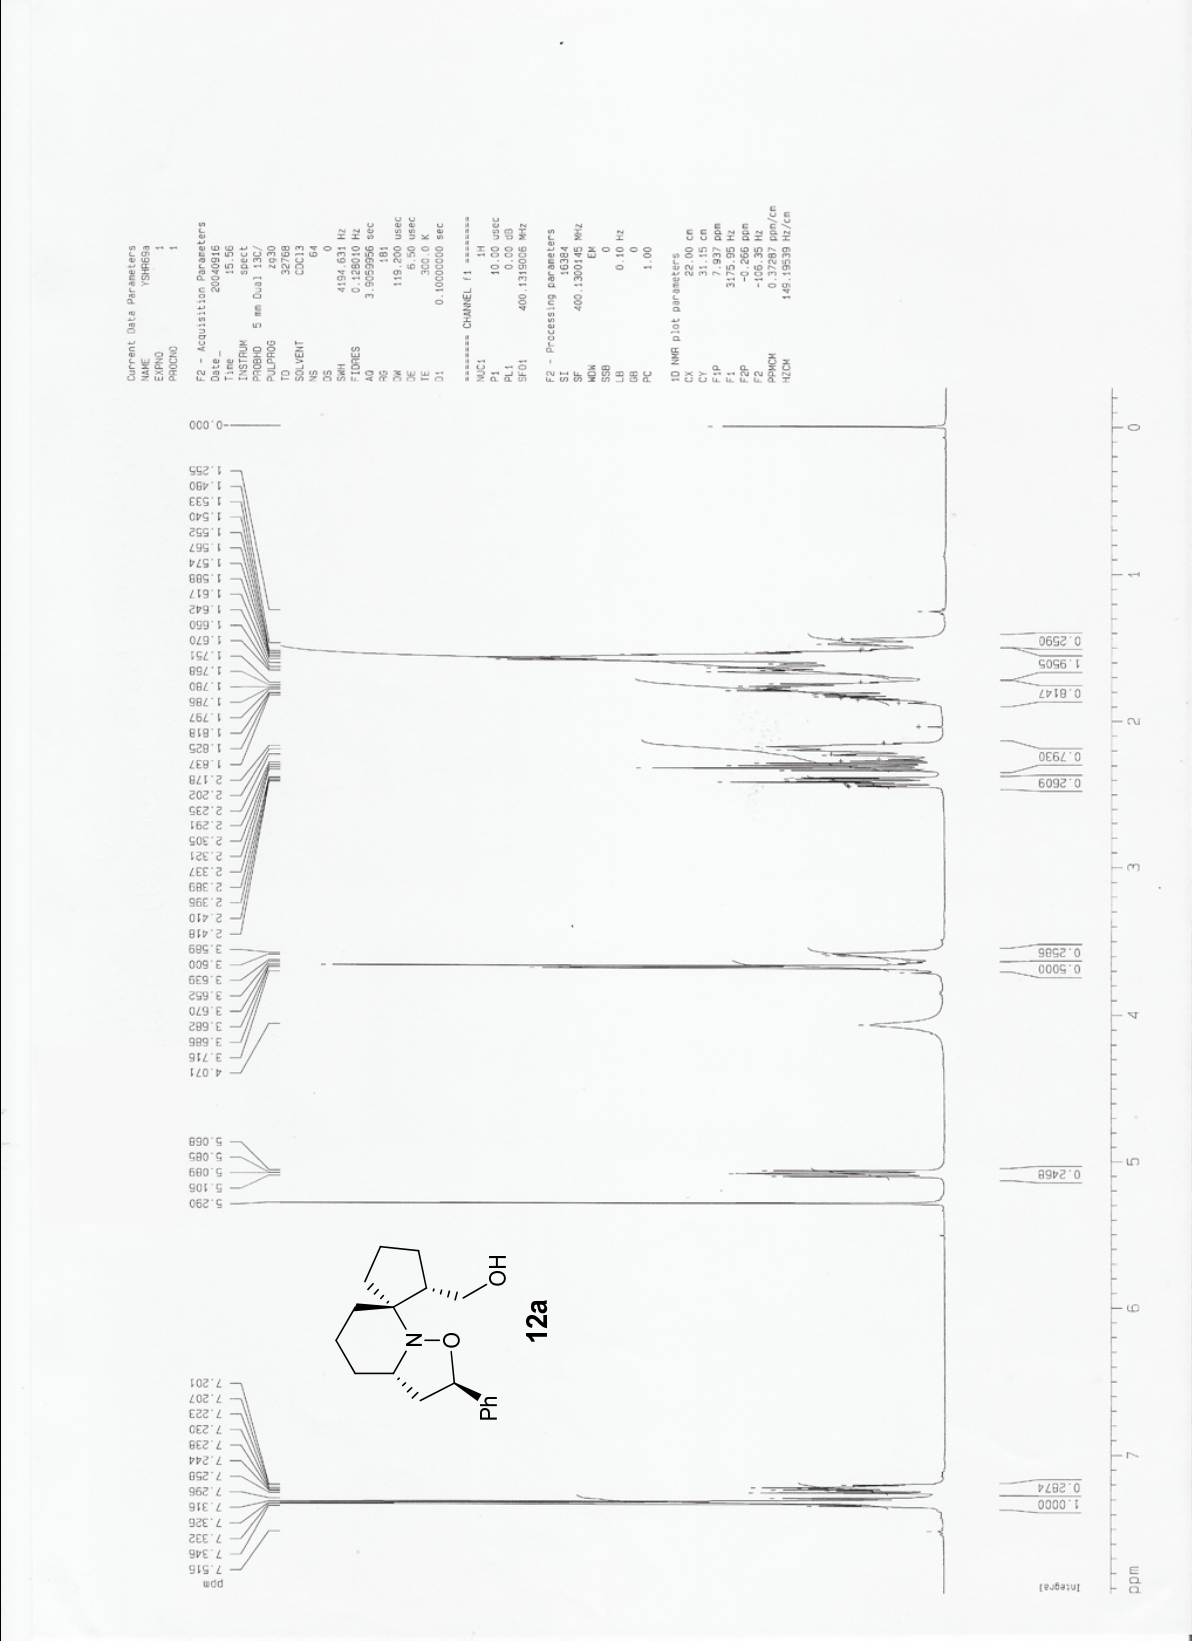

Current Data Parameters  
 NAME YSHR22t.w0D  
 EXPNO 2  
 PROCNO 1

F2 - Acquisition Parameters  
 Date\_ 20040531  
 Time 12.45  
 INSTRUM spect  
 PROBHD 5 mm QNP 1H/13  
 PULPROG zgpg  
 TD 65536  
 SOLVENT CDCl3  
 NS 150  
 DS 0  
 SMH 17985.611 Hz  
 FIDRES 0.274439 Hz  
 AQ 1.8219508 sec  
 RG 16384  
 DM 27.800 usec  
 DE 20.00 usec  
 TE 300.0 K  
 D1 0.17583171 sec  
 d11 0.03000000 sec  
 d12 0.00020000 sec

===== CHANNEL f1 =====  
 NUC1 13C  
 P1 5.44 usec  
 PL1 4.00 dB  
 SF01 75.4760973 MHz

===== CHANNEL f2 =====  
 CPDPRG2 waltz16  
 NUC2 1H  
 PCPD2 102.00 usec  
 PL2 120.00 dB  
 PL12 20.20 dB  
 PL13 25.80 dB  
 SF02 300.1312005 MHz

F2 - Processing parameters  
 SI 32768  
 SF 75.4677532 MHz  
 WDW EM  
 SSB 0  
 LB 1.00 Hz  
 GB 0  
 PC 1.00

ID NMR plot parameters  
 CX 22.00 cm  
 CY 21.08 cm  
 FIP 130.000 ppm  
 F1 9810.81 Hz  
 F2 0.000 ppm  
 F2 0.00 Hz  
 PRNCM 5.90909 ppm/cm  
 ZCM 4465.94580 Hz/cm

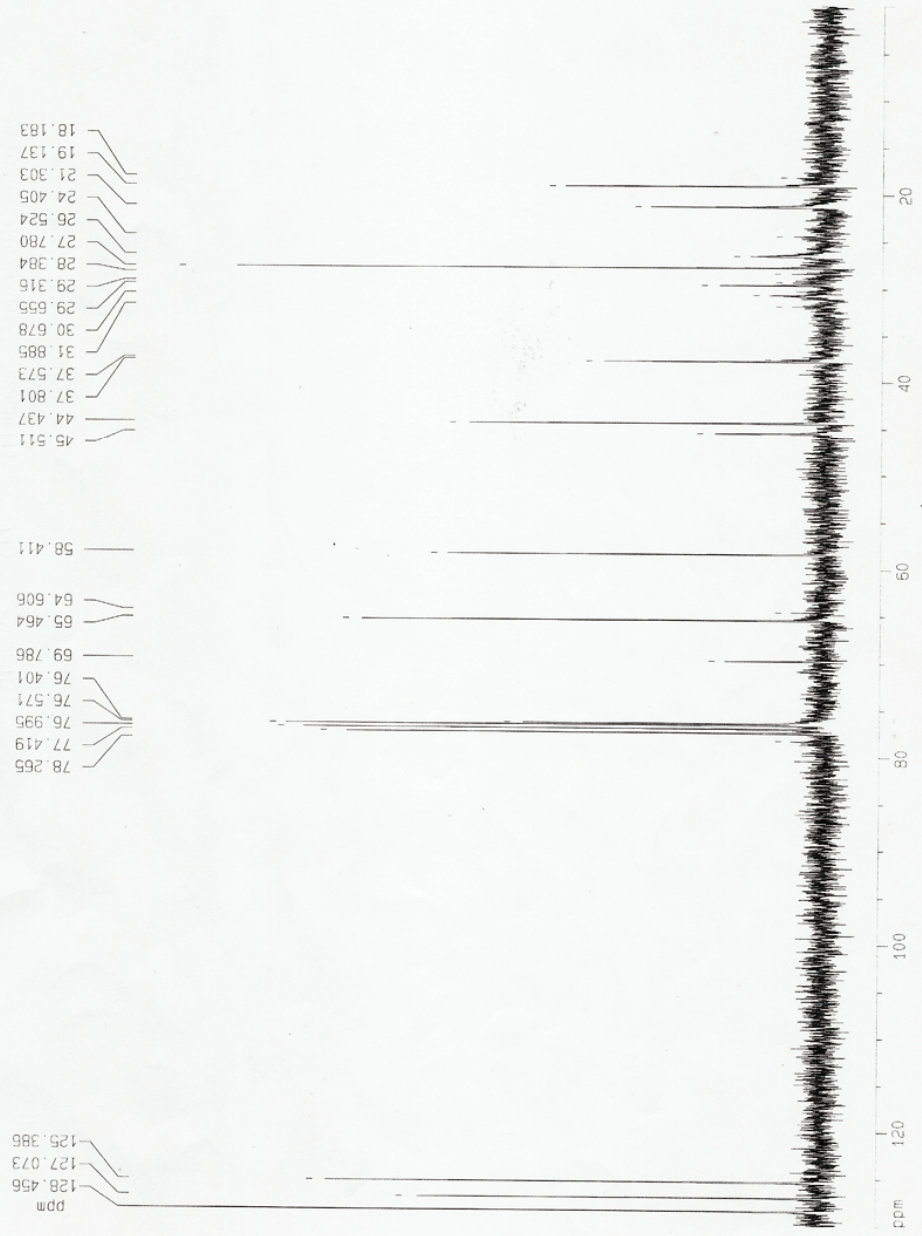

NAME: ethylacrylate-major  
 EXPNO: 1  
 PROCNO: 1  
 F2: 2005611  
 FILE: 4143  
 INSTRUM: spect  
 PROBHD: 5 mm QNP 1H/13  
 PULPROG: zg30  
 TD: 32768  
 SOLVENT: cdcl3  
 NS: 16  
 DS: 4  
 SWH: 5995.504 Hz  
 FIDRES: 0.82359 Hz  
 AQ: 2.7329611 sec  
 RG: 96.5  
 DW: 83.400 usec  
 DE: 6.00 usec  
 TE: 300.0 K  
 D1: 6.10000000 sec

----- CHANNEL f1 -----  
 NUC1: 1H  
 P1: 8.30 usec  
 PL1: 1.00 dB  
 SFO1: 300.1315006 MHz  
 SI: 16384  
 SF: 300.1300000 MHz  
 SW: 50  
 GB: 0  
 LB: C.10 Hz  
 GB: 0  
 PC: C.80

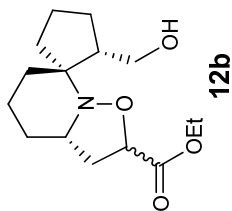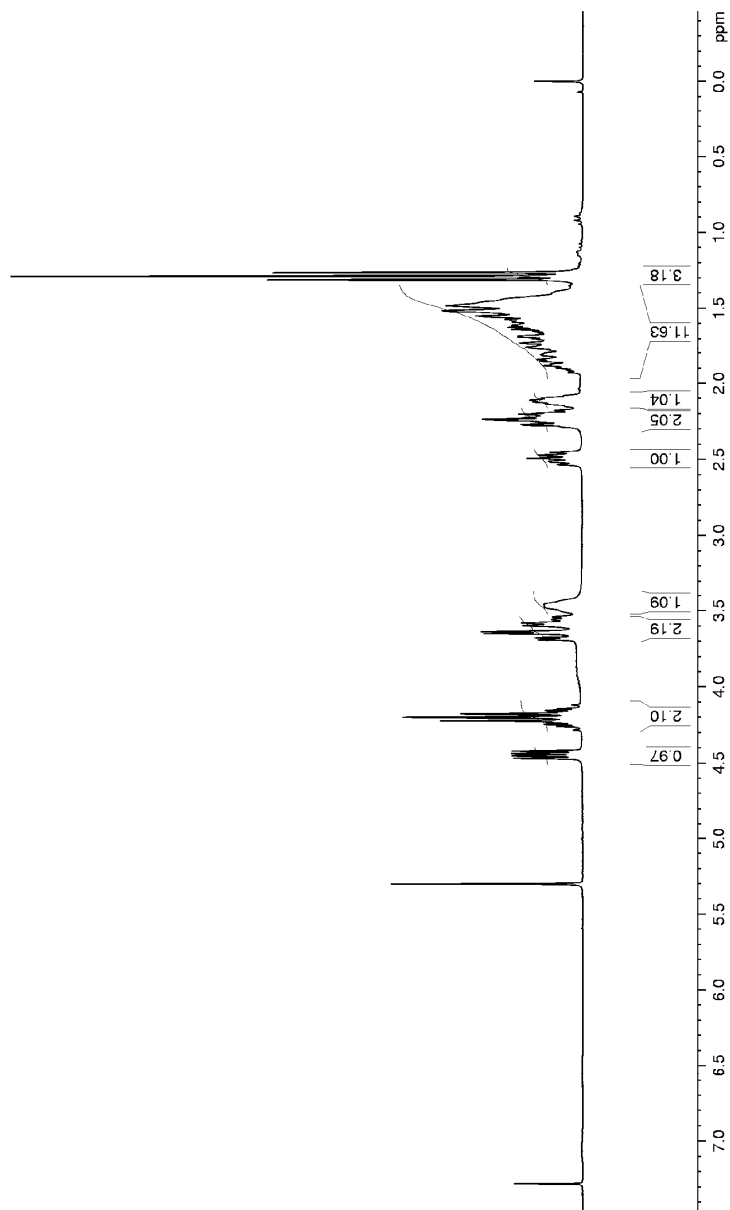

```

NAME          ethylacrylate_mcfior
PROCNO       1
Date_        20080614
Time         4.56
INSTRUM     spect
PROBHD      5 mm QNP 1H/13
PULPROG     zgpg30
TD          65536
SOLVENT     CDCl3
NS          200
DS          4
AQ          1.7985610 Hz
FIDRES     0.274439 Hz
RG          1.48219608 sec
RG          1.62884
AQ          2.7000 usec
RG          300.0 usec
DE          300.0 usec
DI          0.17593171 sec
d11         0.03000000 sec
d12         0.00020000 sec

===== CHANNEL f1 =====
NUC1        13C
P1          5.44 usec
PL1         4.00 dB
SFO1        75.769973 MHz

===== CHANNEL f2 =====
CPDPRG2    waltz16
NUC2        1H
P2          102.00 usec
PL2         19.00 dB
SFO2        300.1312005 MHz
PL12       20.20 dB
PL13       25.80 dB
SFO12      300.1312005 MHz
S1         32768
S2         32768
RG1M       50
SSB        0
LB         1.00 Hz
GB         0
LC         1.00

```

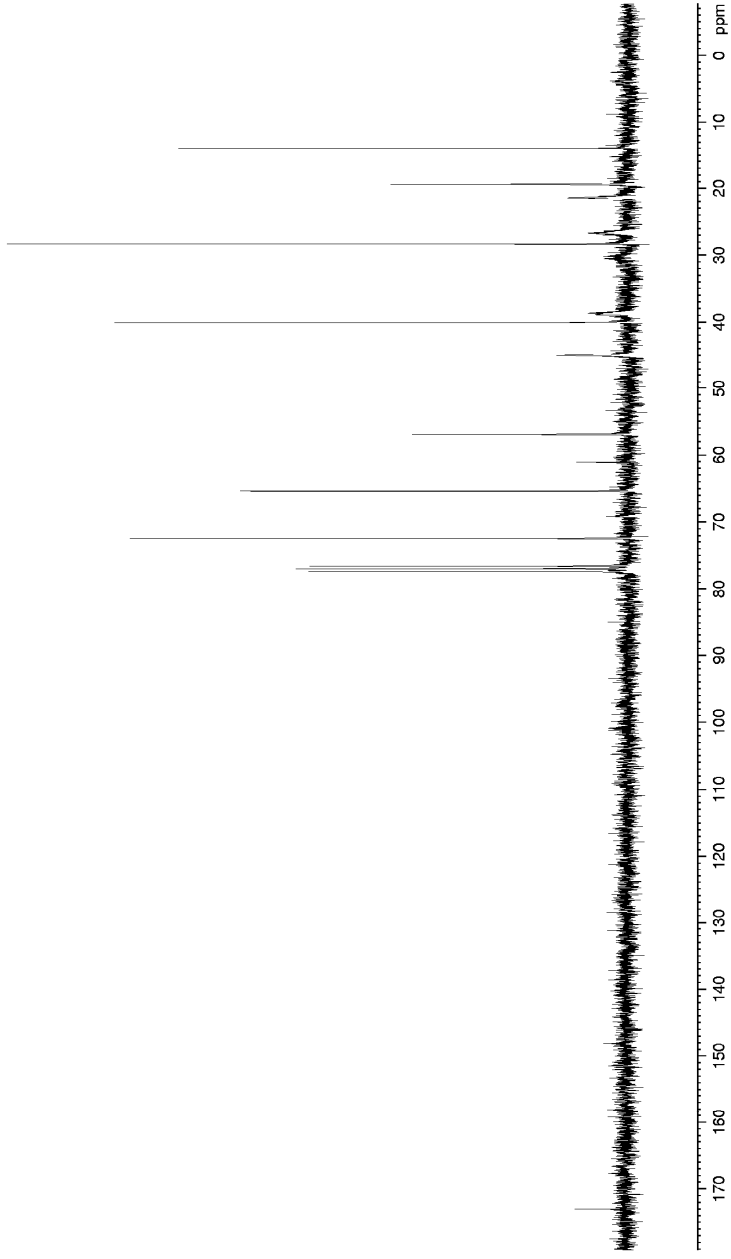



Current Data Parameters  
 NAME YSH R23(cosy-1)  
 EXPNO 1  
 PROCNO 1

F2 - Acquisition Parameters  
 Date\_ 20040512  
 Time 16.49  
 INSTRUM spect  
 PROBHD 5 mm QNP 1H/13  
 PULPROG zg30  
 TD 32768  
 SOLVENT CDCl3  
 NS 250  
 DS 0  
 SWH 5995.204 Hz  
 FIDRES 0.182959 Hz  
 AQ 2.7329011 sec  
 RG 128  
 DW 83.400 usec  
 DE 6.00 usec  
 TE 300.0 K  
 D1 0.10000000 sec

===== CHANNEL f1 =====  
 NUC1 1H  
 P1 8.30 usec  
 PL1 -1.00 dB  
 SFO1 300.1315006 MHz

F2 - Processing parameters  
 SI 16384  
 SF 300.1300007 MHz  
 WDW EM  
 SSB 0  
 LB 0.10 Hz  
 GB 0  
 PC 0.80

1D NMR plot parameters  
 CX 22.00 cm  
 CY 27.47 cm  
 F1P 8.393 ppm  
 F1 2519.08 Hz  
 F2P 0.421 ppm  
 F2 -126.30 Hz  
 -P1CN 0.40064 ppm/cm  
 -H2CM 120.24472 Hz/cm

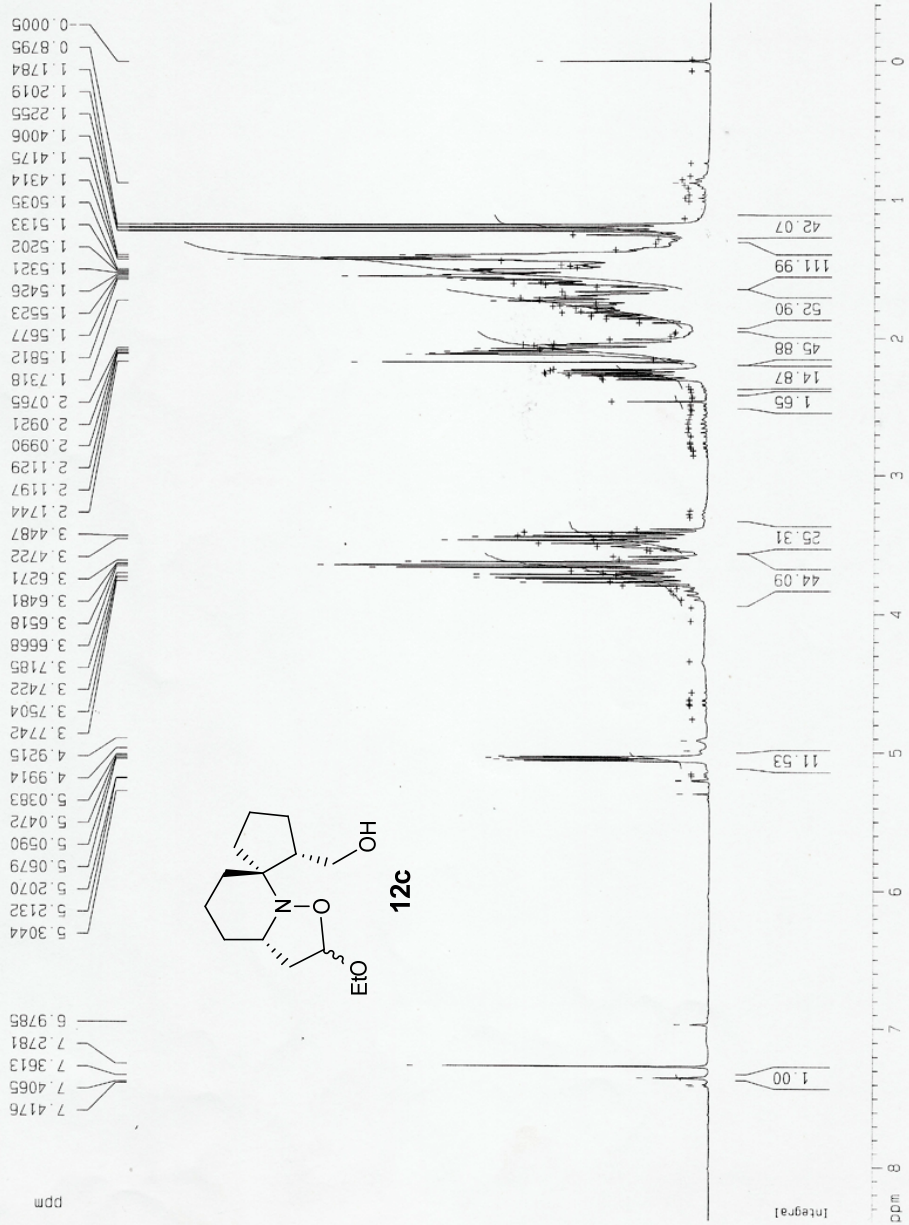

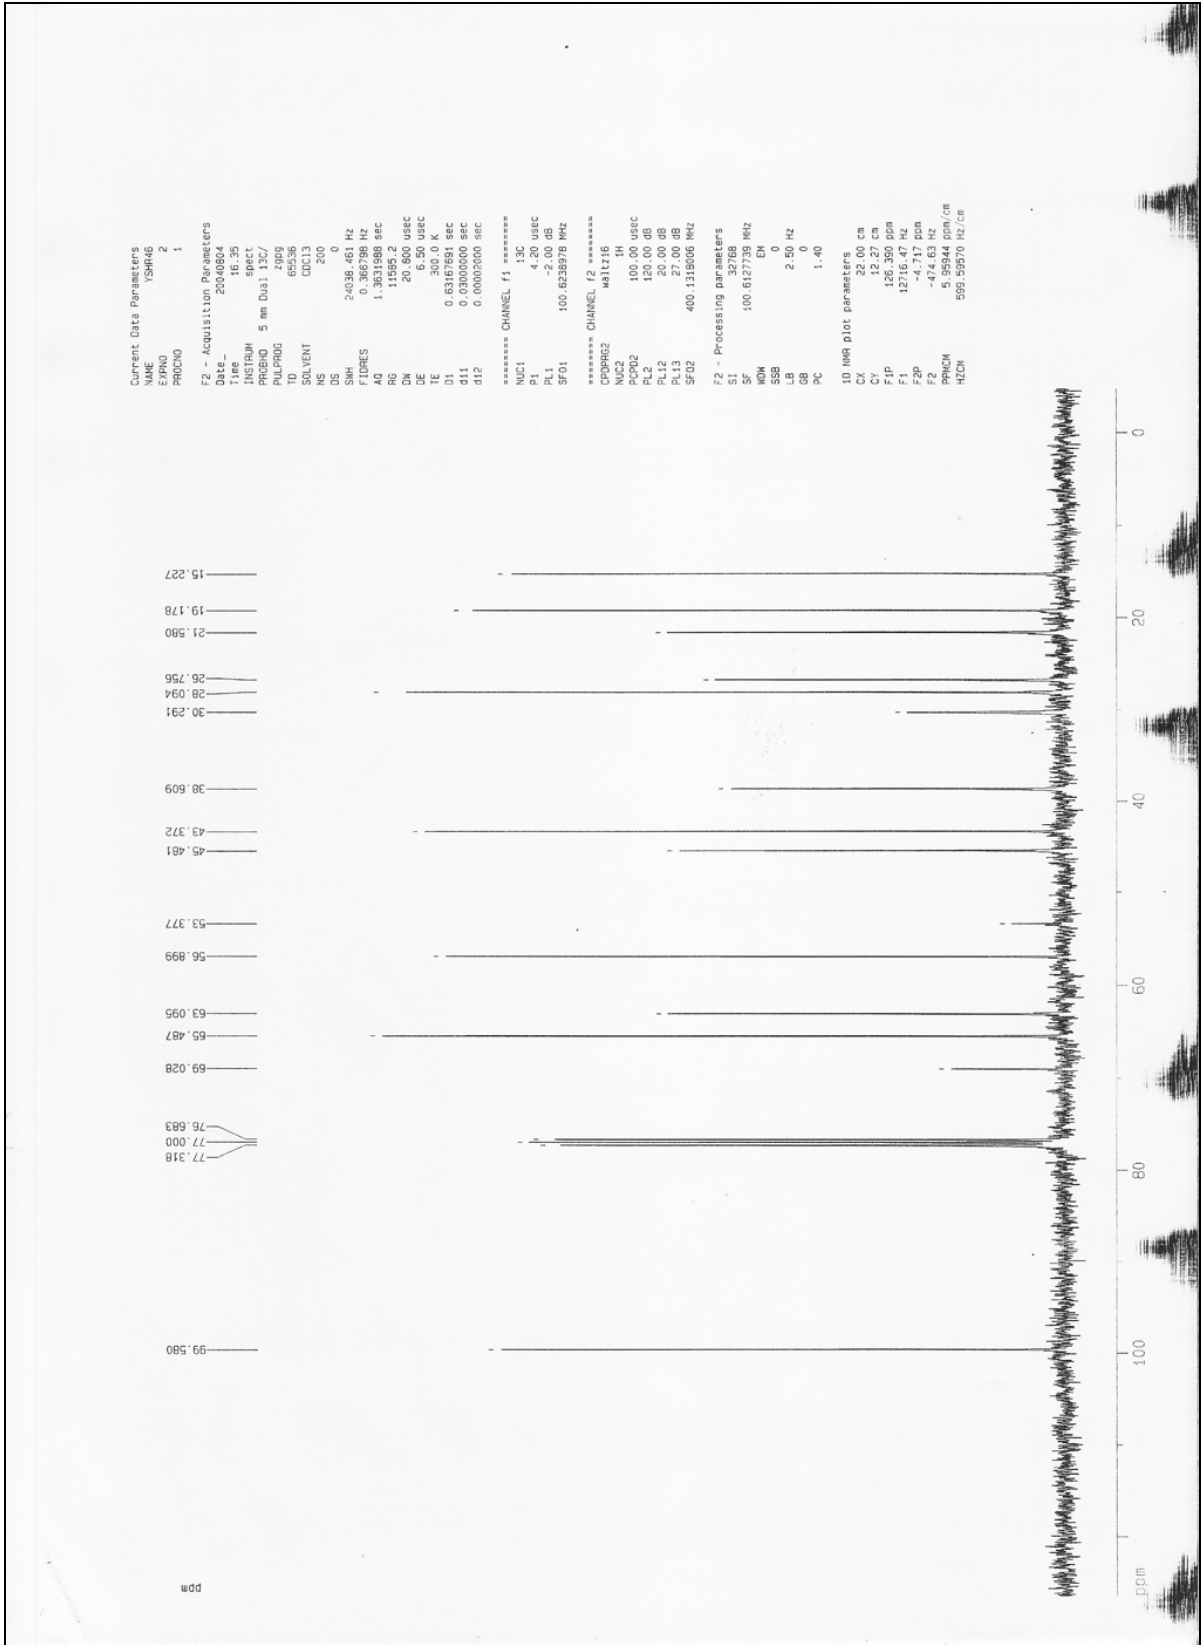

```

NAME: gpa048 2d 310
EXPNO: 1
PROCNO: 1
Date_ 20060821
Time: 15:08
INSTRUM: spect
PROBHD: 5 mm QNP 1H/13
PULPROG: zg30
TD: 32768
SOLVENT: cdcl3
NS: 16
DS: 4
SWH: 4464.179 Hz
FIDRES: 0.02339 Hz
AQ: 3.527797 sec
RG: 32
DM: 107.200 usec
DE: 6.00 usec
TE: 300.0 K
D1: 0.10000000 sec

----- CHANNEL f1 -----
NUC1: 13C
P1: 9.50 usec
PL1: 1.00 dB
SFO1: 300.1321759 MHz
SI: 16394
WDW: EM
SSB: 0
LB: 0
GB: 0
PC: 0.80

```

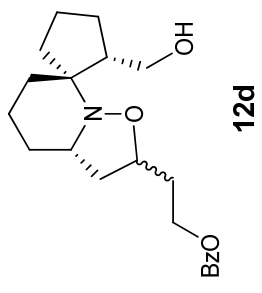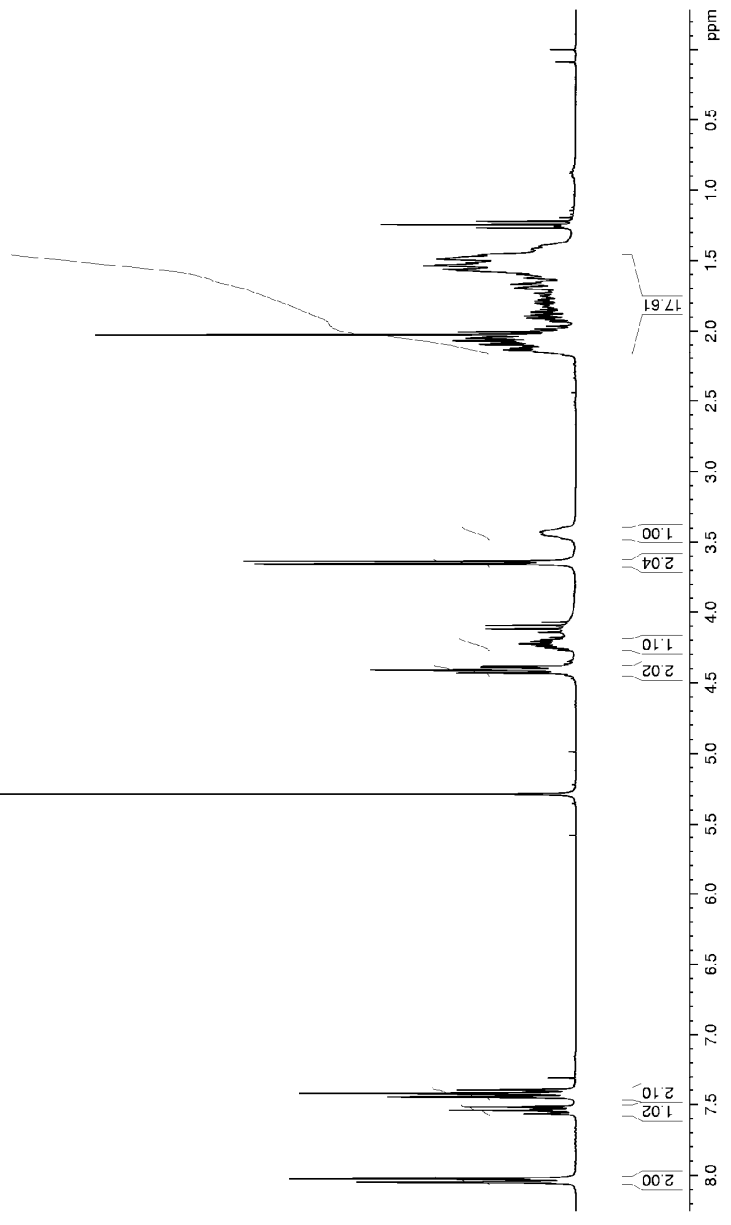

```

NAME      3Fm040-24-300
PROCNO    1
Date_     20080922
Time      16.16
INSTRUM   spect
PROBHD    5 mm QNP 1H/13
PULPROG   zgpg30
TD         65536
SOLVENT   CDCl3
NS         200
DS         4
AQ         1.7985610 Hz
FIDRES    0.274439 Hz
RG         1.48219608 sec
RG         1.62894
AQ         2.00000000 sec
RG         2.00000000 sec
RG         300.00
D1         0.17593171 sec
d11        0.03000000 sec
d12        0.00002000 sec

===== CHANNEL f1 =====
NUC1       13C
P1         5.00 usec
PL1        6.00 dB
SFO1       75.768973 MHz

===== CHANNEL f2 =====
CPDPRG2   waltz16
NUC2       1H
P2         100.00 usec
PL2        19.00 dB
SFO2       300.1312005 MHz
SFO2       300.1312005 MHz
SI         32768
RG         50
SSB        0
LB         1.00 Hz
GB         0
UC         1.00

```

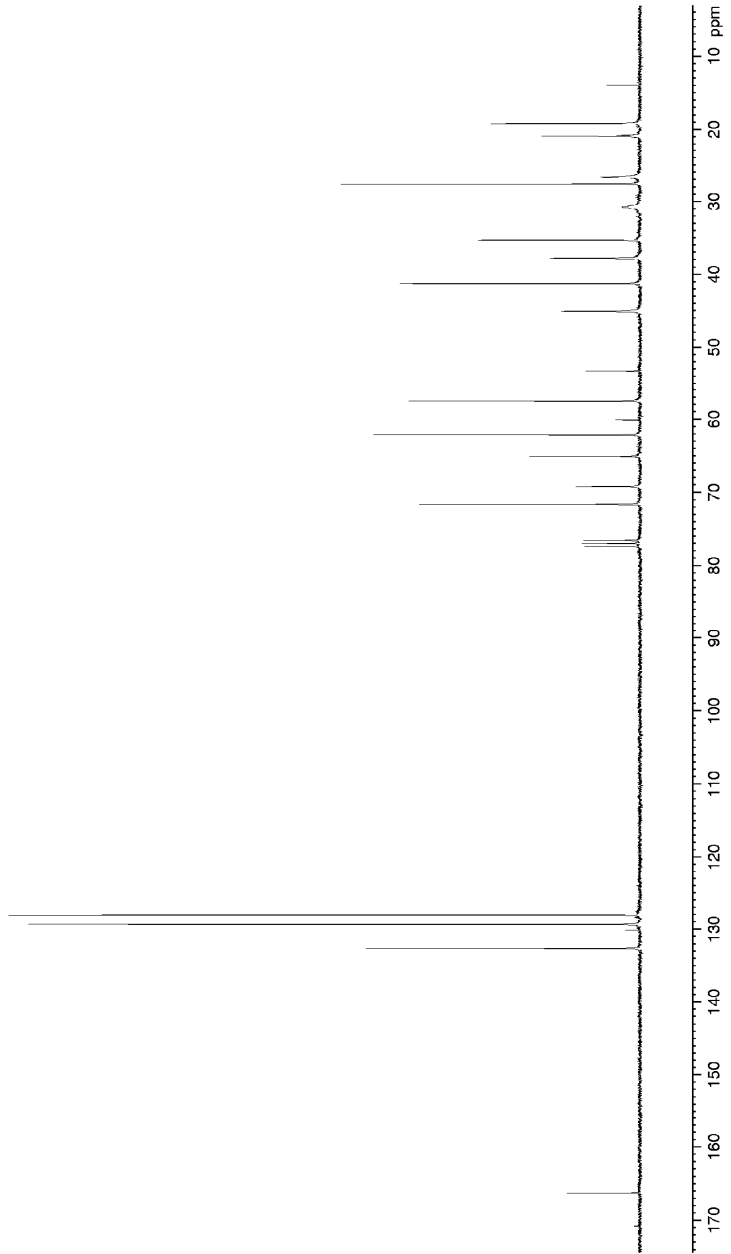

Current Data Parameters  
 NAME YSHR36benzene1  
 EXPNO 1  
 PROCNO 1

F2 - Acquisition Parameters  
 Date\_ 20040707  
 Time 15.35

INSTRUM spect  
 PROBHD 5 mm QNP 1H/13  
 PULPROG zg30  
 TD 32768  
 SOLVENT C6D6  
 NS 96  
 DS 0  
 SWH 2853.881 Hz  
 FIDRES 0.087094 Hz  
 AQ 5.7410035 sec  
 RG 181  
 DM 175.200 usec  
 DE 6.00 usec  
 TE 300.0 K  
 TC 0.10000000 sec  
 D1 0.10000000 sec

\*\*\*\*\* CHANNEL f1 \*\*\*\*\*  
 NUC1 1H  
 P1 8.30 usec  
 PL1 -1.00 dB  
 SF01 300.1312755 MHz

F2 - Processing parameters  
 SI 16384  
 SF 300.1299933 MHz  
 MDW EM  
 SSB 0  
 LB 0.10 Hz  
 GB 0  
 PC 0.80

1D NMR plot parameters  
 CX 22.00 cm  
 CY 25.67 cm  
 F1 7.862 ppm  
 F2 2389.53 Hz  
 F2 -0.197 ppm  
 F2 -59.13 Hz  
 FWHM 0.36631 ppm/cm  
 HZCM 109.93929 Hz/cm

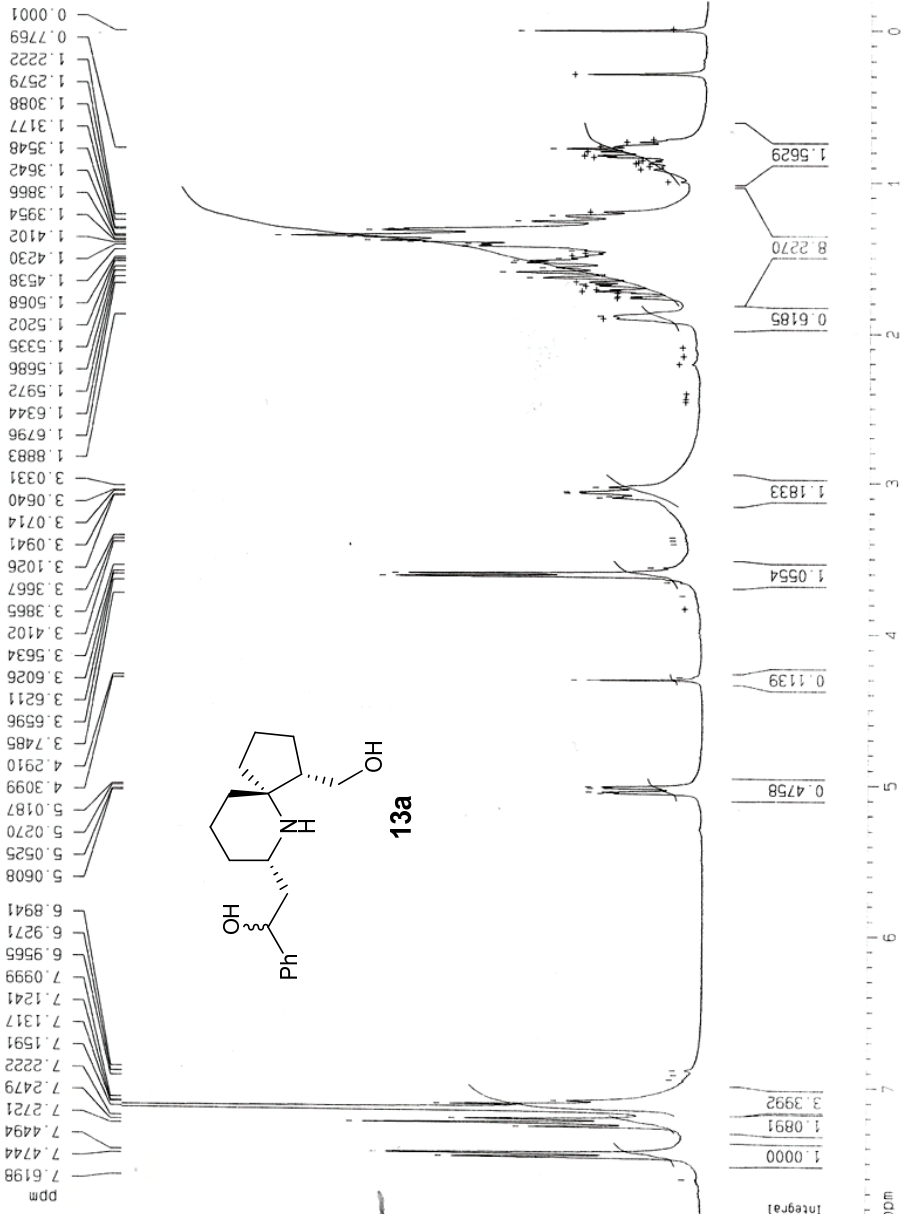

Current Data Parameters  
 NAME Y5HR3benzene1  
 EXPNO 2  
 PROCNO 1

F2 - Acquisition Parameters

Date\_ 20040707  
 Time 15.43  
 INSTRUM spect  
 PROBD 5 mm QNP 1H/13  
 PULPROG zgpg  
 TD 65536  
 SOLVENT CDCl3  
 NS 200  
 DS 0  
 SWH 17985.611 Hz  
 FIDRES 0.274439 Hz  
 AQ 1.8219508 sec  
 RG 14596.5  
 DM 27.800 usec  
 DE 20.00 usec  
 TE 300.0 K  
 D1 0.17593171 sec  
 d11 0.03000000 sec  
 d12 0.00002000 sec

===== CHANNEL f1 =====  
 NUC1 13C  
 P1 5.44 usec  
 PL1 4.00 dB  
 SFO1 75.4760973 MHz

===== CHANNEL f2 =====  
 CPDPRG2 waltz16  
 NUC2 1H  
 PCPD2 102.00 usec  
 PL2 120.00 dB  
 PL12 20.20 dB  
 PL13 25.80 dB  
 SFO2 300.1312005 MHz

F2 - Processing parameters  
 SI 32768  
 SF 75.4677208 MHz  
 EM  
 WDW 0  
 LB 1.00 Hz  
 GB 0  
 PC 1.00

ID NMR plot parameters  
 CX 25.00 cm  
 CY 17.78 cm  
 F1P 160.148 ppm  
 F1 12085.99 Hz  
 F2P -1.613 ppm  
 F2 -121.75 Hz  
 FWHM 7.35277 ppm/cm  
 FZCM 554.89697 Hz/cm

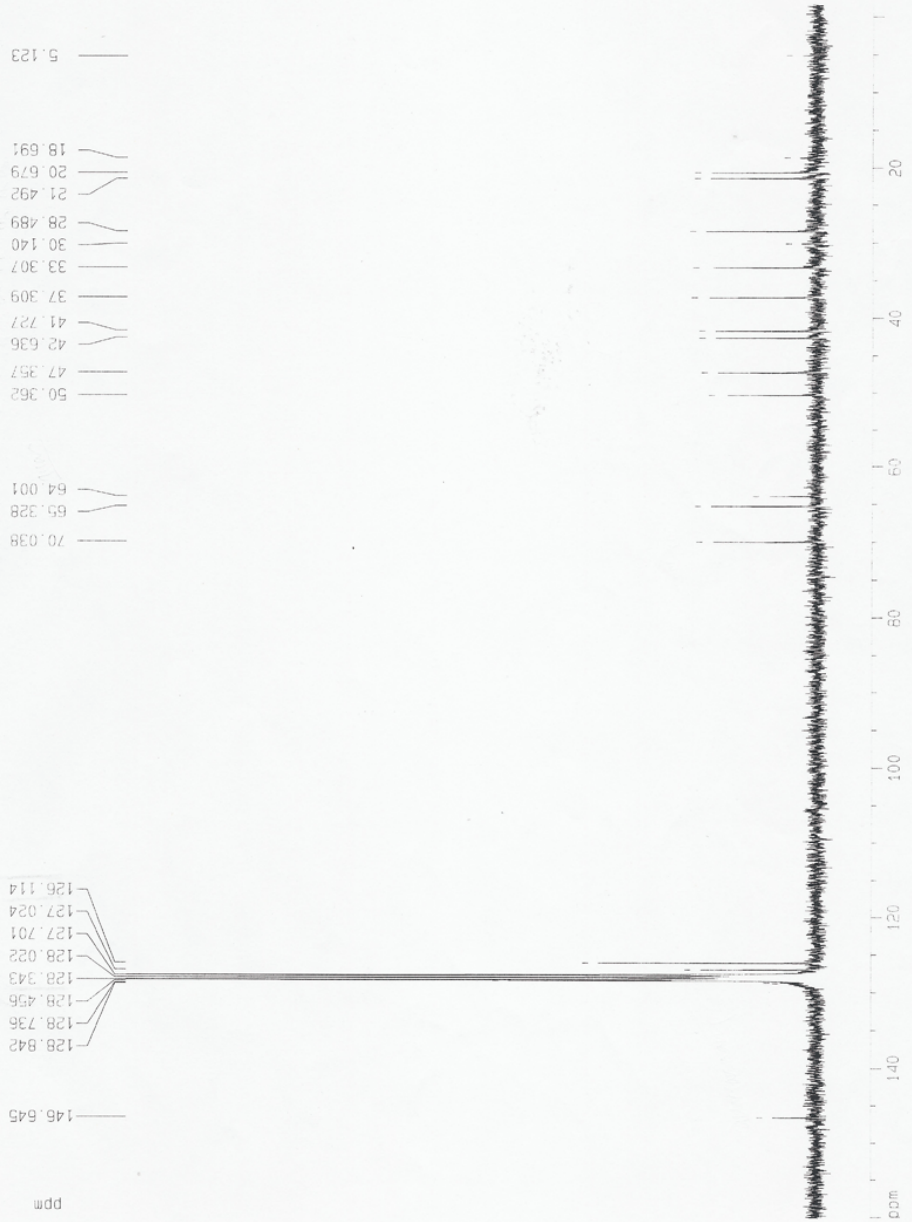

```

NAME: K O cleave
EXPNO: 1
PROCNO: 1
PULPROG: zgpg30
TD: 65536
SOLVENT: CDCl3
AQ: 0.047
RG: 327.68
SI: 16384
SF: 400.1300000
WDW: EM
SSB: 0
LB: 0
GB: 0
PC: 1.00
  
```

```

----- CHANNEL f1 -----
NUC1: 1H
P1: 10.00 usec
PL1: 0.00 dB
SFO1: 400.1300000 MHz
SI: 16384
WDW: EM
SSB: 0
LB: 0
GB: 0
PC: 1.00
  
```

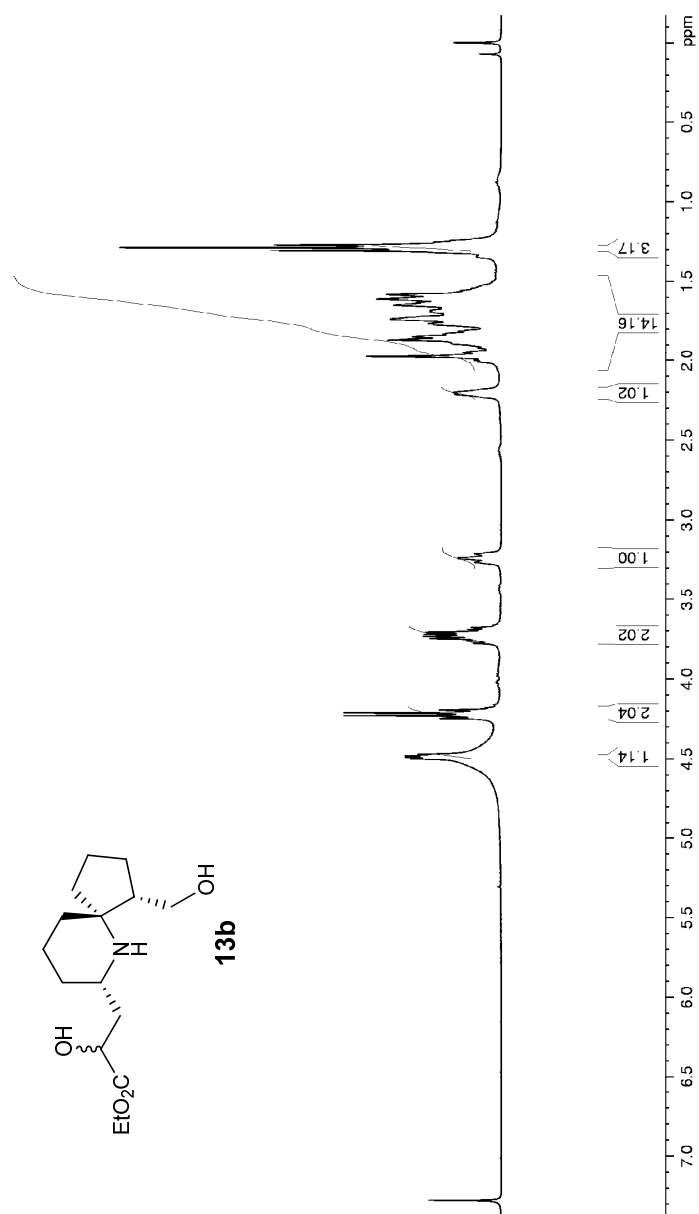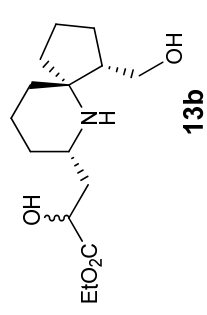

```

Current Data Parameters
=====
NAME          H-O Name
PROBHD       1
P2 - Acquisition Parameters
=====
INSTRUM      500 MHz NMR
PULPROG      zgpg30
DELTA        5.000000 sec
ACQVERS      2.882
SOLVENT      CDCl3
NS           200
DS           4
SWH           200.98463 Hz
AQ           1.9831898 sec
RG           1.0000000 sec
SM           20.000000 usec
ZG           3.500000 usec
ZD           0.6316763 sec
ZS           0.0000000 sec
ZB           0.0000000 sec
ZC           0.0000000 sec
----- CHANNEL f1 -----
NUC1          13C
P1           4.76
SFO1          100.6283778 MHz
===== CHANNEL f2 =====
NAME         13C
NUC2          13C
P2           162.11
SFO2          125.760485 MHz
P1L1         145.00 dB
P1L2         145.00 dB
P1L3         145.00 dB
SFO3          400.1318100 MHz
----- Processing Parameters -----
SI           32768
SF           100.6283778 MHz
RG           1.0000000 sec
WDW          EM
SSB          0
LBI          2.50 Hz
GB           1.40
SC           1.40
=====
ID NMR plot parameters
=====
CX           22.00 cm
SI           71.778 ppm
FID          10.548 ppm
ZPG          3.643 Hz
SFO3         273.83440 Hz/cm
=====

```

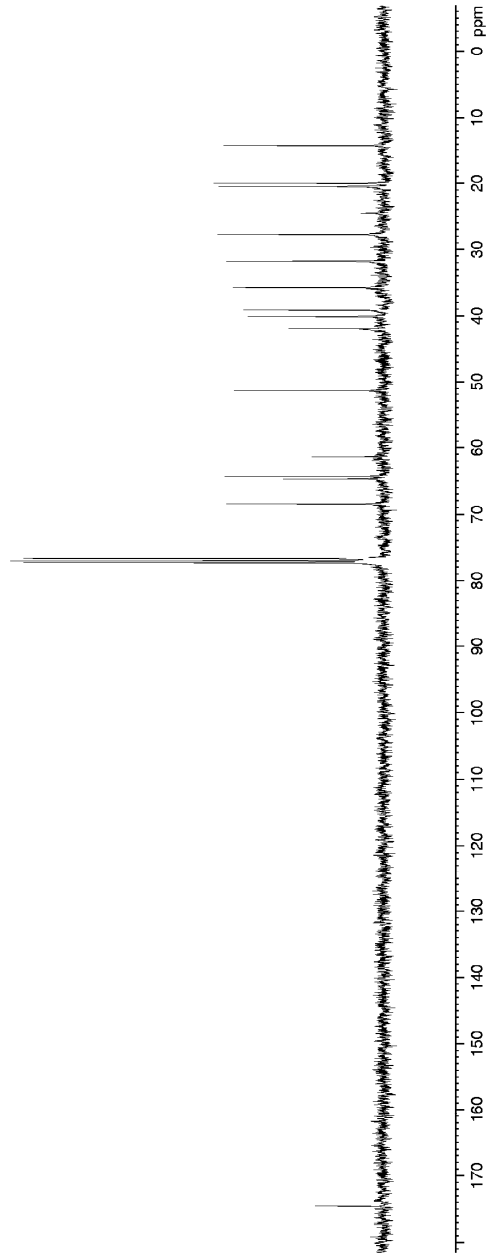



```

NAME: Y2U34D5 F160D
EXPNO: 1
PROCNO: 1
Date_ 20070111
Time: 11:17
INSTRUM: spect
PROBHD: 5 mm QNP 1H/13
PULPROG: zg30
TD: 32768
SOLVENT: CDCl3
NS: 16
DS: 4
AQ: 4464.179 Hz
FIDRES: 0.42339 Hz
RG: 3.527797 sec
RC: 96.5
DM: 107.200 usec
DE: 6.00 usec
TE: 300.0 K
D1: 6.1000000 sec

----- CHANNEL f1 -----
NUC1: 1H
P1: 9.30 usec
PL1: 0.00 dB
SFO1: 300.1321759 MHz
SI: 16384
SF: 300.1299951 MHz
WDW: EM
SSB: 0
LB: 0
GB: 0
PC: 0.80

```

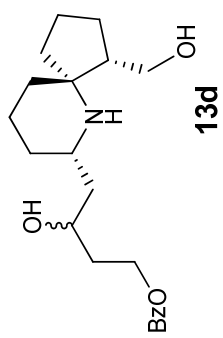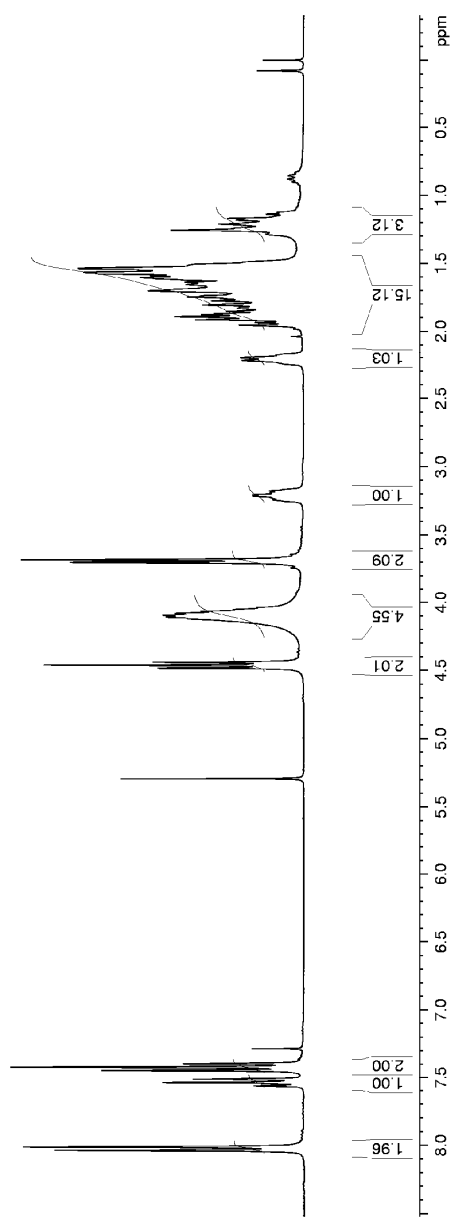

```

NAME          YSFR405.two
PROCNO       1
Date_        2007/11/12
Time         12:35
INSTRUM     spect
PROBHD      5 mm QNP 1H/13
PULPROG     zgpg30
TD          65536
SOLVENT     CDCl3
NS          200
DS          4
AQ          1.77985610 Hz
FIDRES      0.274439 Hz
RG          1.48219608 sec
RG          1.62894
AQ          27.0000 usec
RG          2.0000 usec
DE          300.0 usec
DI          0.17593171 sec
d11         0.03000000 sec
d12         0.00002000 sec

===== CHANNEL f1 =====
NUC1        13C
P1          5.44 usec
PL1         4.00 dB
SFO1        75.776973 MHz

===== CHANNEL f2 =====
CPDPRG2     waltz16
NUC2        1H
P2          100.00 usec
PL2         0.00 dB
SFO2        300.1312005 MHz
PL12        20.80 dB
PL13        26.40 dB
SFO12       300.1312005 MHz
S1          32768
S2          32768
RG1         20
RG2         20
LB          1.00 Hz
GB          0
LC          1.00

```

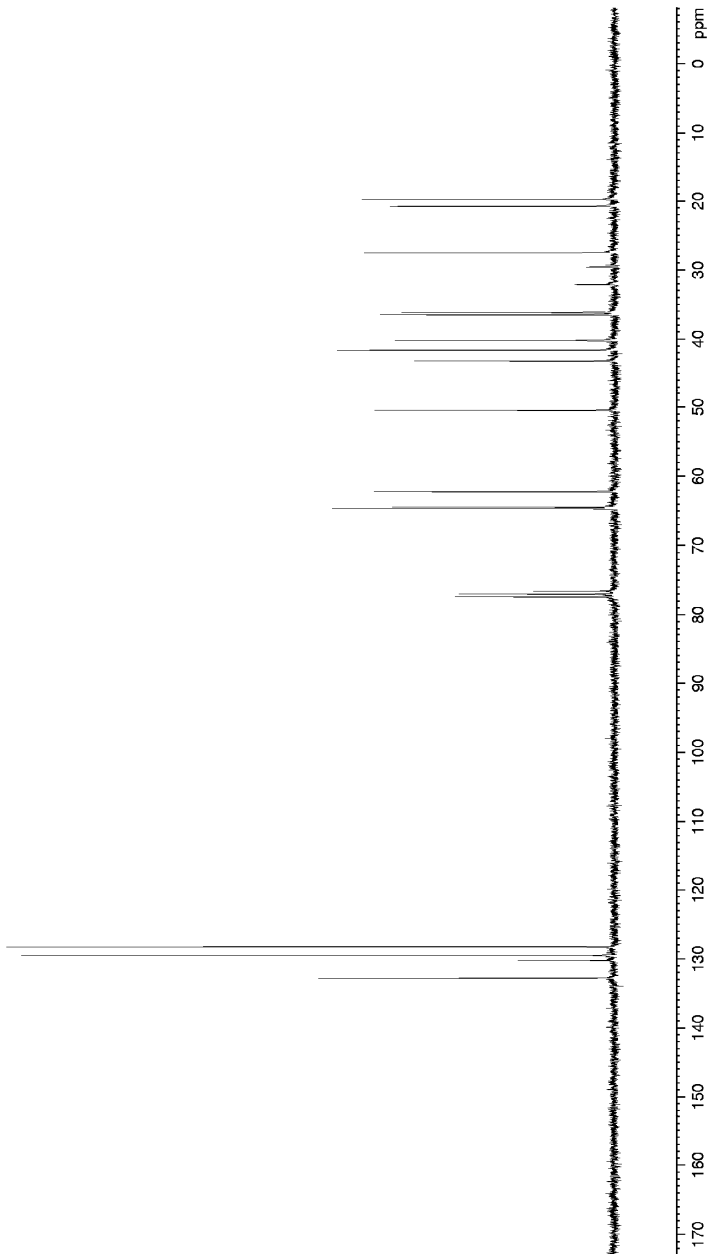

Current Data Parameters  
 NAME YSHR742D  
 EXPNO 1  
 PROCNO 1

F2 - Acquisition Parameters  
 Date\_ 20041006  
 Time 15.31  
 INSTRUM spect  
 PROBHD 5 mm QNP 1H/13  
 PULPROG zg30  
 TD 32768  
 SOLVENT CDD13  
 NS 32  
 DS 0  
 SMH 4864.179 Hz  
 FIDRES 0.142339 Hz  
 AQ 3.512797 sec  
 RG 143.7  
 DM 107.200 usec  
 DE 6.00 usec  
 TE 300.0 K  
 D1 0.10000000 sec

\*\*\*\*\* CHANNEL f1 \*\*\*\*\*  
 NU1C1 1H  
 P1 8.30 usec  
 PL1 -1.00 dB  
 SF01 300.1321759 MHz

F2 - Processing parameters  
 SI 16384  
 SF 300.1300006 MHz  
 MDW EM  
 SSB 0  
 LB 0.10 Hz  
 GB 0  
 PC 0.80

1D NMR plot parameters  
 CX 22.00 cm  
 CY 11.77 cm  
 F1P 10.123 ppm  
 F1 3038.10 Hz  
 F2P -0.348 ppm  
 F2 -104.39 Hz  
 PRMCM 0.47593 ppm/cm  
 -F2CM 142.84048 Hz/cm

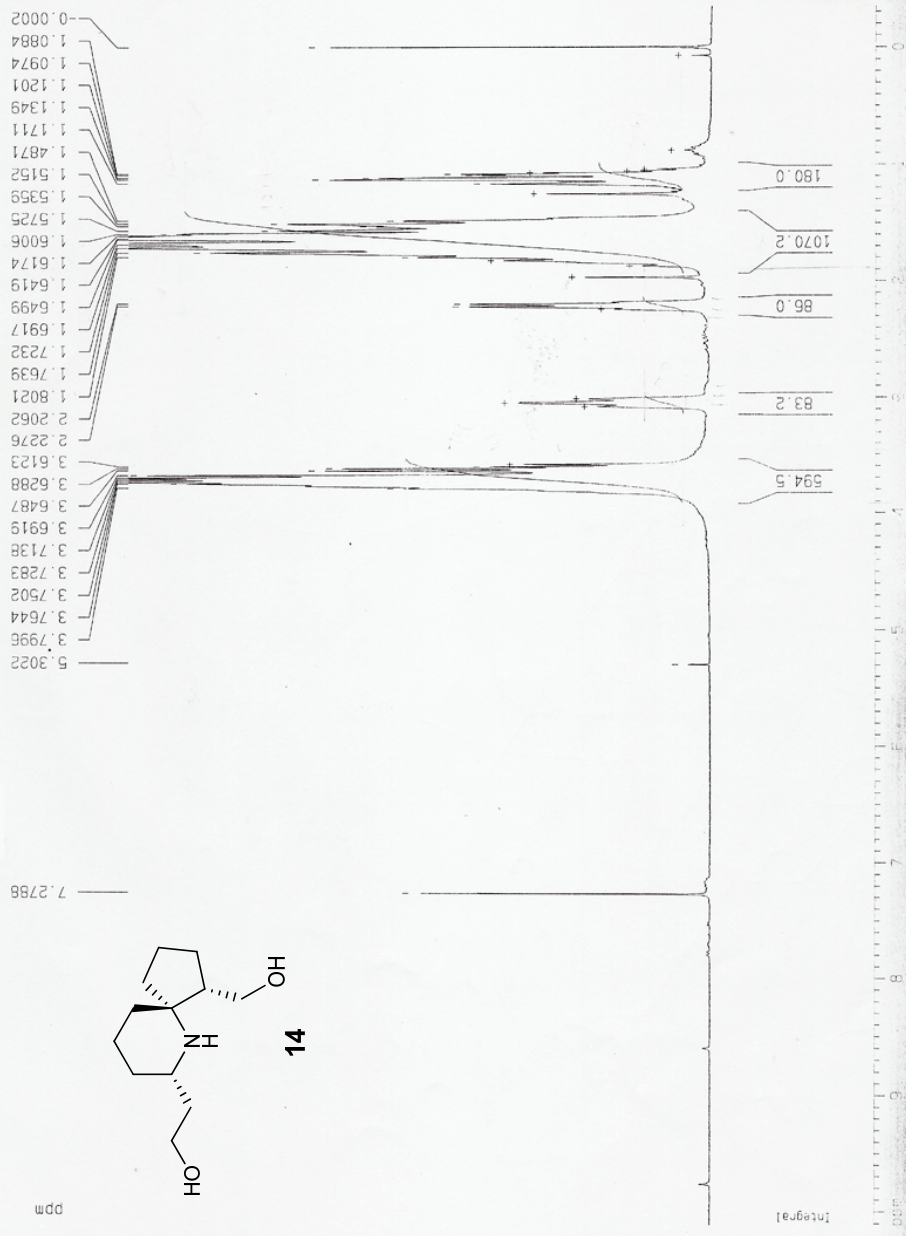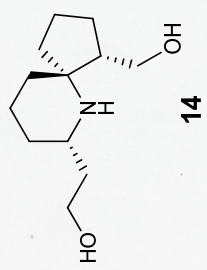

Current Data Parameters  
 NAME YSHR742D  
 EXPNO 2  
 PROCNO 1

F2 - Acquisition Parameters  
 Date\_ 20041006  
 Time 15:38  
 INSTRUM spect  
 PROBHD 5 mm QNP 1H/13  
 PULPROG zgpg  
 TD 65536  
 SOLVENT CDCl3  
 NS 200  
 DS 0  
 SWH 17985.611 Hz  
 FIDRES 0.274439 Hz  
 AQ 1.8219508 sec  
 RG 16384  
 DW 27.800 usec  
 DE 20.00 usec  
 TE 300.0 K  
 D1 0.17583171 sec  
 d11 0.03000000 sec  
 d12 0.00002000 sec

===== CHANNEL f1 =====  
 NUC1 13C  
 P1 5.44 usec  
 PL1 4.00 dB  
 SF01 75.4760973 MHz

===== CHANNEL f2 =====  
 CPDPRG2 waltz16  
 NUC2 1H  
 PCPD2 102.00 usec  
 PL2 120.00 dB  
 PL12 20.20 dB  
 PL13 25.80 dB  
 SF02 300.1312005 MHz

F2 - Processing parameters  
 SI 32768  
 SF 75.4677521 MHz  
 MDW EM  
 SSB 0  
 LB 1.00 Hz  
 GB 0  
 SC 1.00

1D NMR plot parameters  
 CX 22.00 cm  
 CY 11.48 cm  
 F1P 90.024 ppm  
 F1 6793.92 Hz  
 F2P -5.007 ppm  
 F2 -377.84 Hz  
 SFO1 4.31958 ppm/cm  
 SFO2 325.96920 Hz/cm

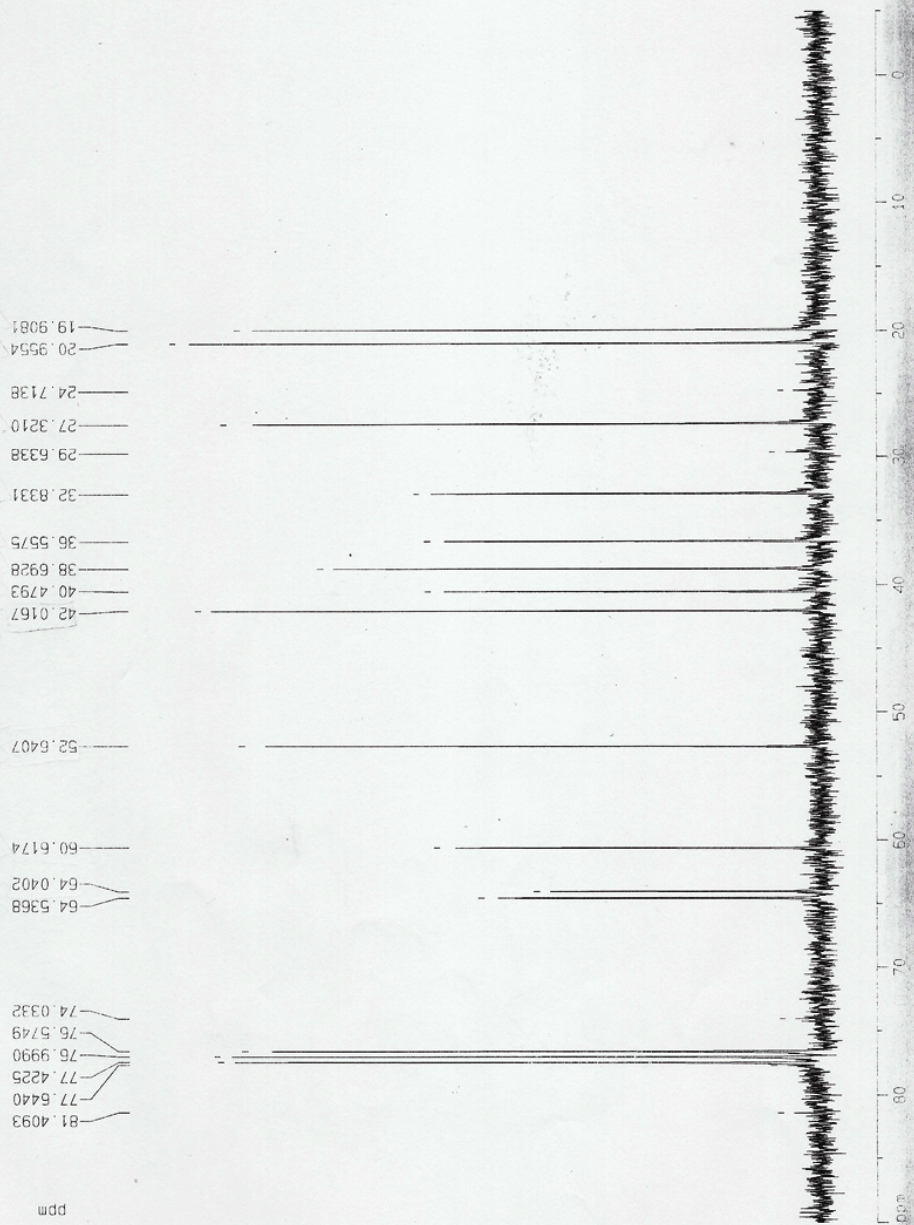

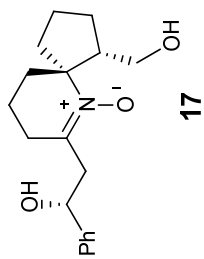

```

NAME: VBT1788
EXPNO: 1
PROCNO: 1
Date_ 20081011
Time: 02:45
INSTRUM: spect
PROBHD: 5 mm QNP 1H/13
PULPROG: zg30
TD: 32768
SOLVENT: cdcl3
NS: 16
DS: 4
AQ: 2556.270 Hz
FIDRES: 0.078610 Hz
AQ: 6.4094710 sec
RG: 161.3
DM: 195.600 usec
DE: 6.00 usec
TE: 300.0 K
D1: 0.10000000 sec

----- CHANNEL f1 -----
NUC1: 1H
P1: 9.50 usec
PL1: 1.00 dB
SFO1: 300.1311255 MHz
SI: 16384
SF: 300.1300637 MHz
WDW: EM
SSB: 0
LB: 0
GB: 0
PC: 0.80

```

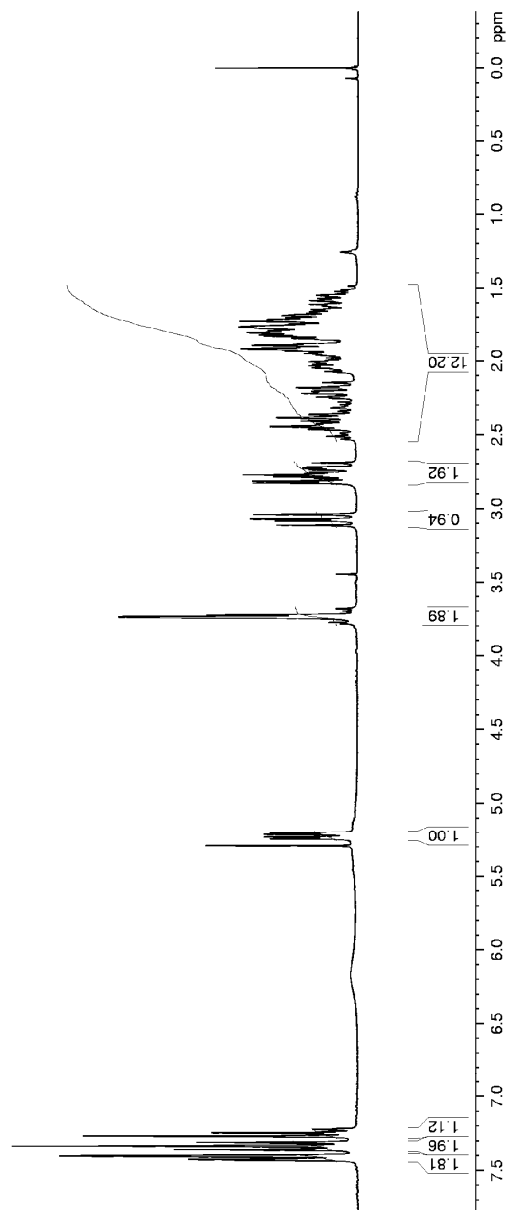



Current Data Parameters  
 NAME: 454499100  
 EXPNO: 1  
 PROCNO: 1  
 Date\_ Acquisition: 20051013  
 Time: 17:20  
 PROBRW: 5 mm QNP 1H/13  
 TD: 65536  
 F2 - F1: 125.760  
 SOLVENT: CDCl3  
 DS: 0  
 SWH: 2633.861 Hz  
 FWHM: 1.100 Hz  
 AQ: 5.1112081 sec  
 RG: 318  
 BQ: 378.500 usec  
 DE: 6.100 usec  
 DD: 0.10000000 sec  
 DI: 0.10000000 sec  
 ===== CHANNEL f1 =====  
 NUC1: 13C  
 P1: 0.150 usec  
 SFO1: 100.622455 MHz  
 F2 - F1: Processing Parameters  
 SI: -4.5384 MHz  
 NFO: 100.617871 MHz  
 SFO: 100.622455 MHz  
 C1: 0 Hz  
 C2: 0 Hz  
 C3: 0 Hz  
 PC: 0.150 usec  
 ===== CHANNEL f2 =====  
 NUC2: 1H  
 P2: 0.150 usec  
 SFO2: 500.136451 MHz  
 F2 - F1: Processing Parameters  
 SI: -4.5384 MHz  
 NFO: 500.136451 MHz  
 SFO: 500.136451 MHz  
 C1: 0 Hz  
 C2: 0 Hz  
 C3: 0 Hz  
 PC: 0.150 usec

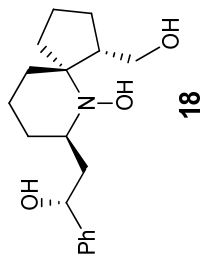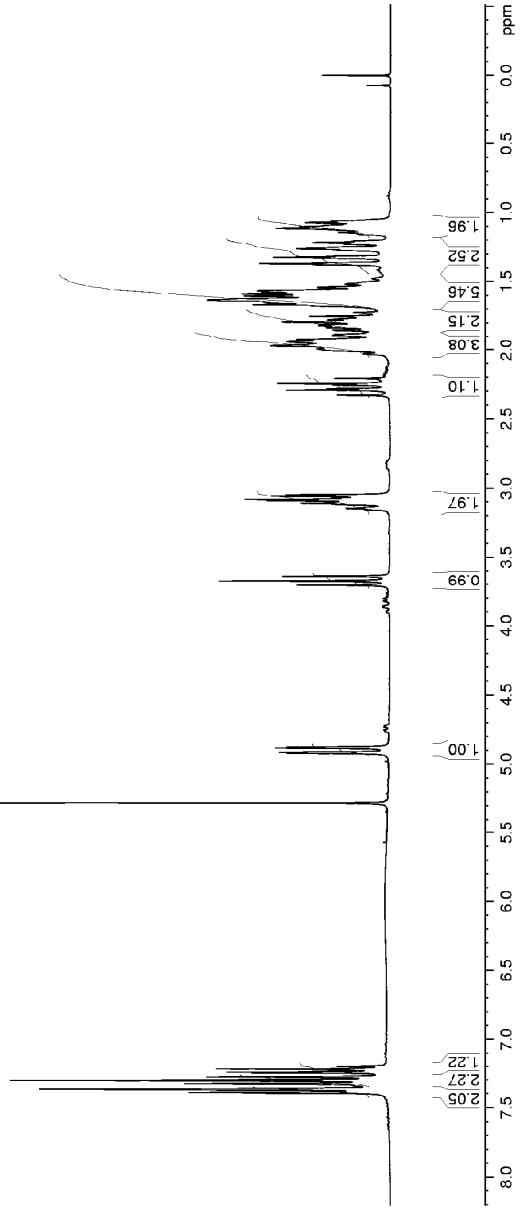

```

Current Data Parameters
=====
NAME          CHAN31F02
PROBHD        1
P2 - Acquisition Parameters
=====
Time         20:03:11
Date         11-14
INSTRUM      500 MHz NMR
PULPROG      zgpg30
AQ          5.00000000 sec
RG          327.68000000
SFOF        300.131000 MHz
=====
F2 - Processing Parameters
=====
SI          1
SF          300.131000 MHz
WDW         EM
SSB         0
LB          1.000 Hz
GB          0
PC          1.00
=====
ID NMR plot parameters
=====
CX          22.00 cm
CT          40.000 PPM
SI          327.68000000
FIDRES      0.191524 Hz
F2P        0.191524 Hz
F2PCM      0.191524 Hz/cm
SFOF        300.131000 MHz
=====

```

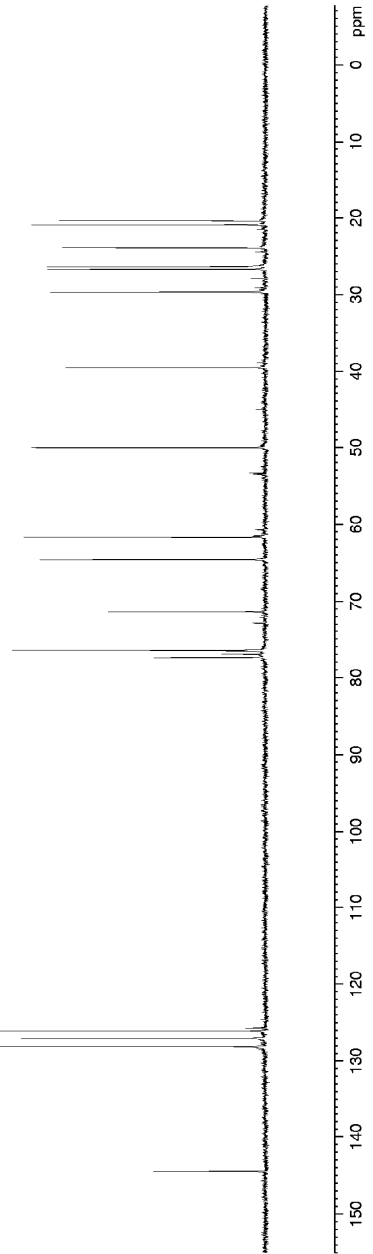



```

NAME: YEU3111  F2WD
EXPNO: 1
PROCNO: 1
Date_  20081031
Time  00:09
INSTRUM: spect
PROBHD: 5 mm QNP 1H/13
PULPROG: zg30
TD: 32768
SOLVENT: CDCl3
NS: 16
DS: 4
AQ: 4464.179 Hz
FIDRES: 0.002339 Hz
RG: 3.507797 sec
RC: 287.4
DM: 107.200 usec
DE: 6.00 usec
TE: 300.0 K
D1: 0.10000000 sec

----- CHANNEL f1 -----
NUC1: 1H
P1: 9.50 usec
PL1: 1.00 dB
SFO1: 300.1321759 MHz
SI: 16384
SF: 300.1300049 MHz
WDW: EM
SSB: 0
LB: 0
GB: 0
PC: 0.80

```

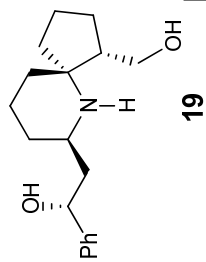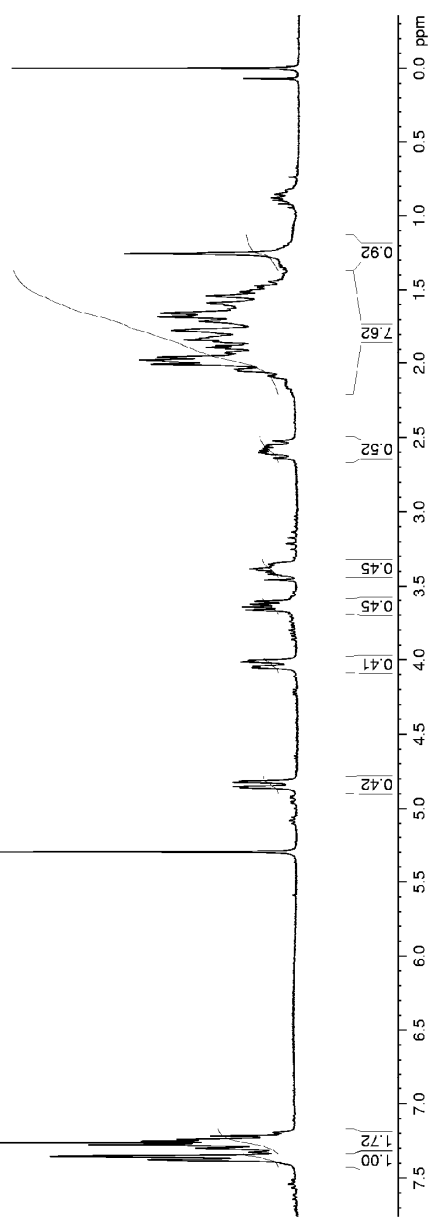



NAME: Glenn 4 - fwoD  
 EXPNO: 1  
 PROCNO: 1  
 Date\_UTC: 20081121  
 Time: 03:13  
 INSTRUM: spect  
 PROBDI: 5 mm QNP 1H/13  
 PULPROG: zg30  
 TD: 32768  
 SOLVENT: CDCl3  
 NS: 16  
 DS: 4  
 SWH: 44664.179 MHz  
 FIDRES: 0.002339 Hz  
 AQ: 3.5027797 sec  
 RG: 161.3  
 DW: 107.200 usec  
 DE: 6.00 usec  
 TE: 300.0 K  
 D1: 6.1000000 sec

----- CHANNEL f1 -----  
 NUC1: 1H  
 P1: 9.50 usec  
 PL1: 1.00 dB  
 SFO1: 300.1321759 MHz  
 SI: 16394  
 SWH: 300.1300053 MHz  
 FWH: 30  
 LB: 0  
 GB: 0  
 PC: 0.80

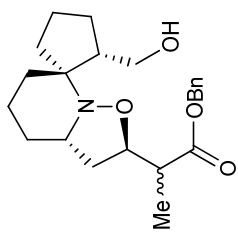

**20**  
 less polar compound

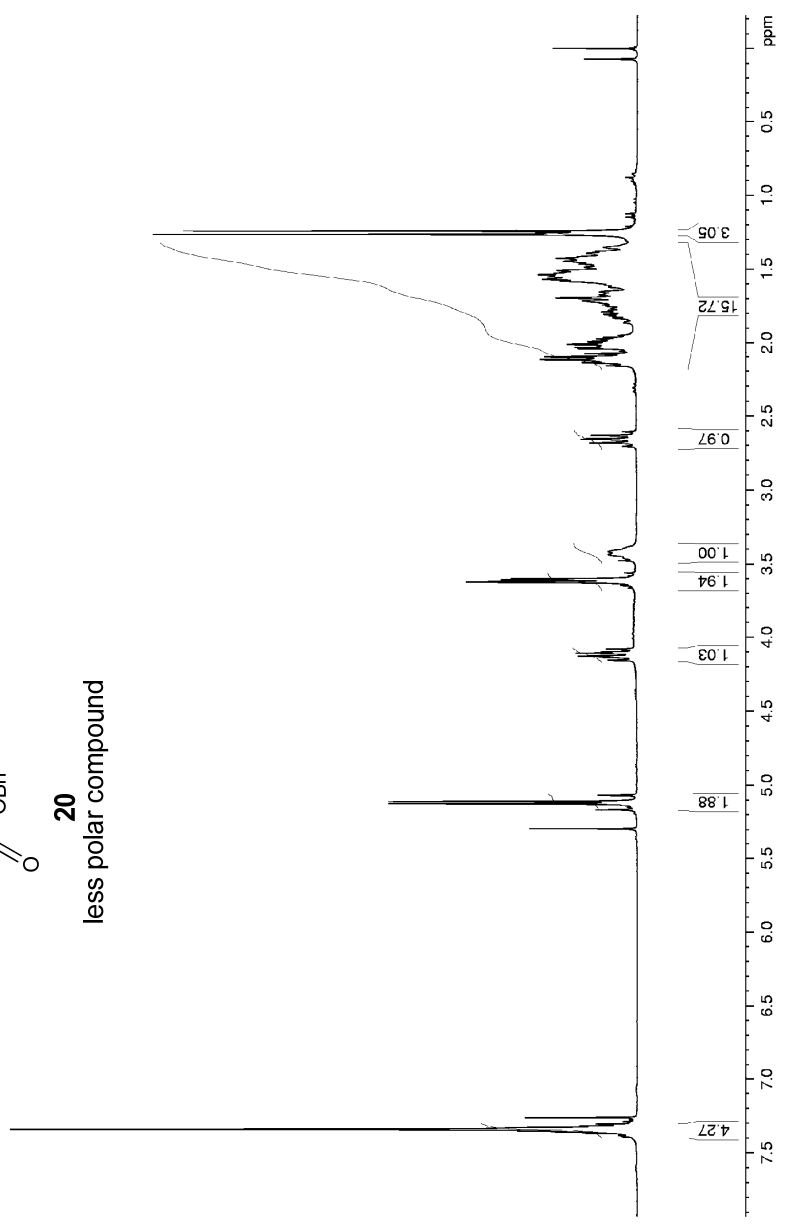

```

NAME      31mm 4-1 two7
PROCNO    1
Date_     20081125
Time      13:20
INSTRUM   spect
PROBHD    5 mm QNP 1H/13
PULPROG   zgpg30
TD         65536
SOLVENT   CDCl3
NS         200
DS         4
AQ         1.7985610 Hz
FIDRES    0.274439 Hz
RG         1.48219608 sec
RG         1.62894
AQ         2.0000000 sec
RG         1.62894
RG         2.0000000 sec
RG         300.0000000 sec
RG         300.0000000 sec
RG         0.17589171 sec
RG         0.03000000 sec
RG         0.03000000 sec
RG         0.00020000 sec
===== CHANNEL f1 =====
NUC1       13C
P1         5.44 usec
PL1        4.00 dB
SFO1       75.768073 MHz
===== CHANNEL f2 =====
CPDPRG2   waltz16
NUC2       1H
P2         100.00 usec
PL2        0.00 dB
SFO2       400.1460000 MHz
===== CHANNEL f3 =====
PL3        19.00 dB
PL13       25.20 dB
SFO3       300.1312005 MHz
SI         32768
SF         75.6775500 MHz
SSB        0
LB         1.00 Hz
GB         0
LC         0.60
  
```

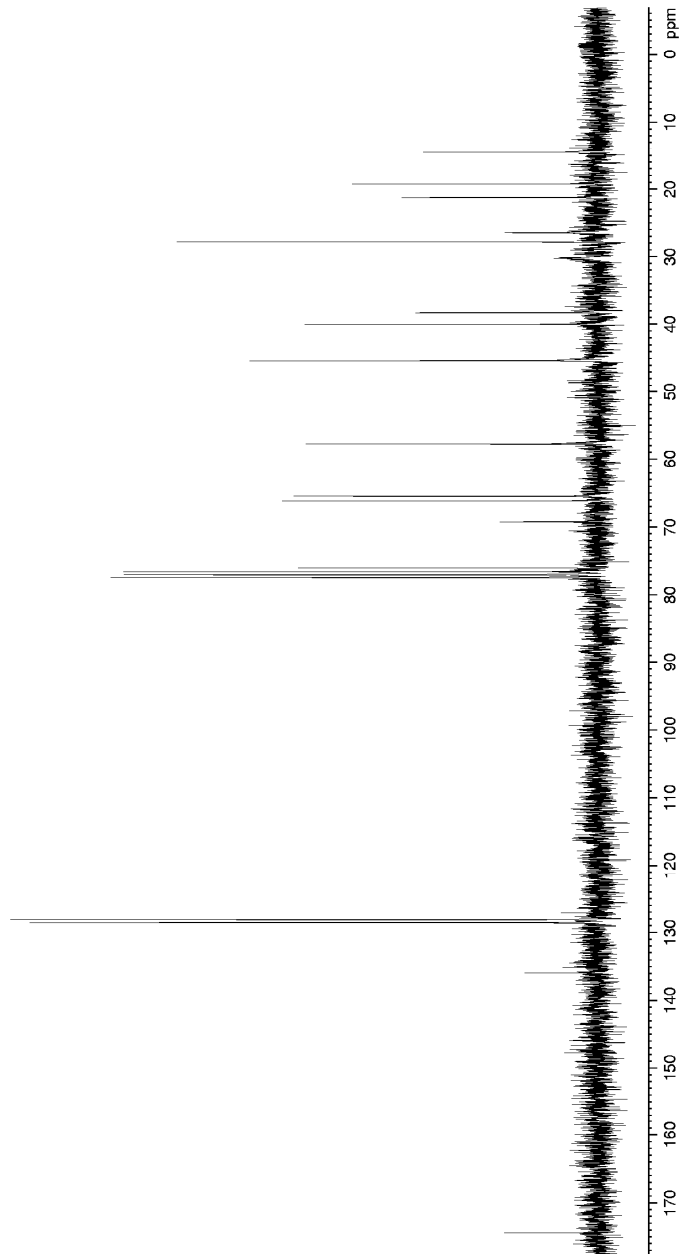

NAME: Glenn 4 2 fwoD  
 EXPNO: 1  
 PROCNO: 1  
 FILE: 20051121  
 TITLE: 02108  
 INSTRUM: spect  
 PROBDI: 5 mm QNP 1H/13  
 F1PRG2: zg30  
 TD: 32768  
 SOLVENT: CDCl3  
 NS: 16  
 DS: 4  
 SWH: 4464.179 Hz  
 FIDRES: 0.02339 Hz  
 AQ: 3.527797 sec  
 RG: 161.3  
 DW: 107.200 usec  
 DE: 6.00 usec  
 TE: 300.0 K  
 D1: 6.1000000 sec  
 ----- CHANNEL f1 -----  
 NUC1: 1H  
 P1: 9.50 usec  
 PL1: 1.00 dB  
 SFO1: 300.1321759 MHz  
 SI: 16394  
 SF: 300.1300055 MHz  
 SW: 50  
 LB: 0  
 GB: 0  
 PC: 0

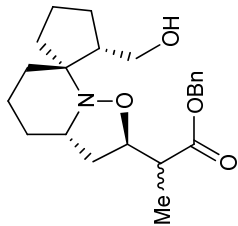

**20**  
 more polar compound

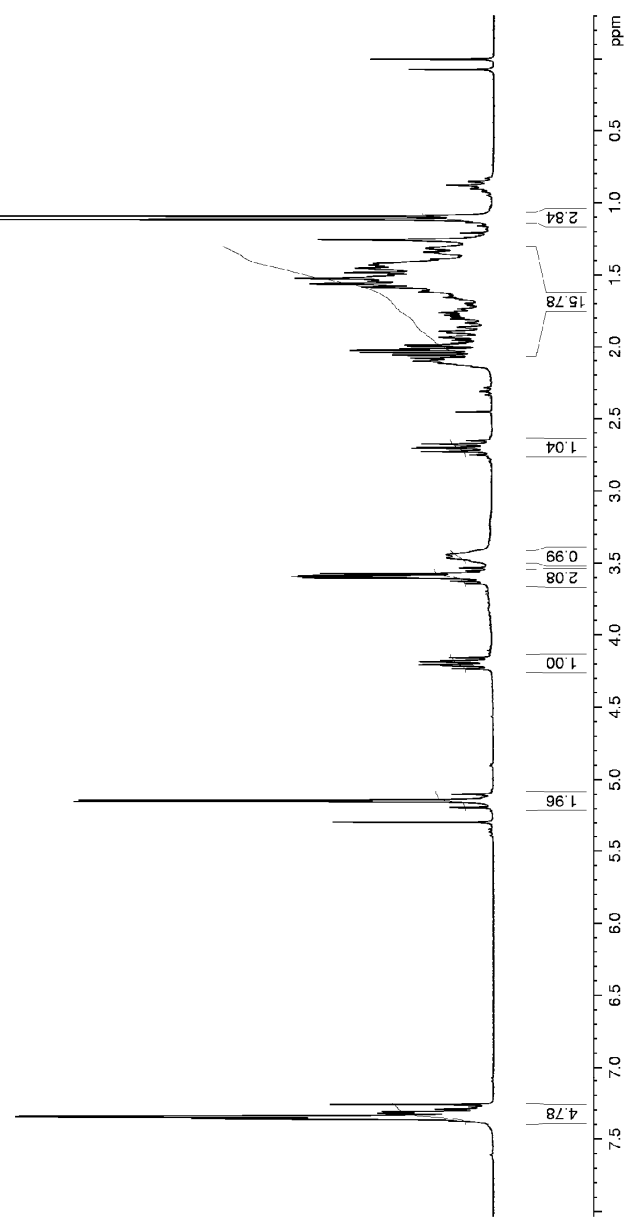

```

NAME      31ann_4-2_two7
PROCNO    1
Date_     20081128
Time      12.19
INSTRUM   spect
PROBHD    5 mm QNP 1H/13
PULPROG   zgpg30
TD         65536
SOLVENT   CDCl3
NS         300
DS         4
AQ         1.77985610 Hz
FIDRES    0.274439 Hz
RG         1.48219608 sec
RW         2.00000000 sec
LB         300.000000 Hz
GB         0
DI         0.17589171 sec
d11        0.03000000 sec
d12        0.00002000 sec

===== CHANNEL f1 =====
NUC1       13C
P1         5.44 usec
PL1        4.00 dB
SFO1       75.768973 MHz

===== CHANNEL f2 =====
CPDPRG2   waltz16
NUC2       1H
P2         100.00 usec
PL2        19.00 dB
SFO2       300.1312005 MHz
=====
S1         32768
SI         32768
SF         75.6677330 MHz
RG         50
SSB        0
LB         1.00 Hz
GB         0
LC         0.60

```

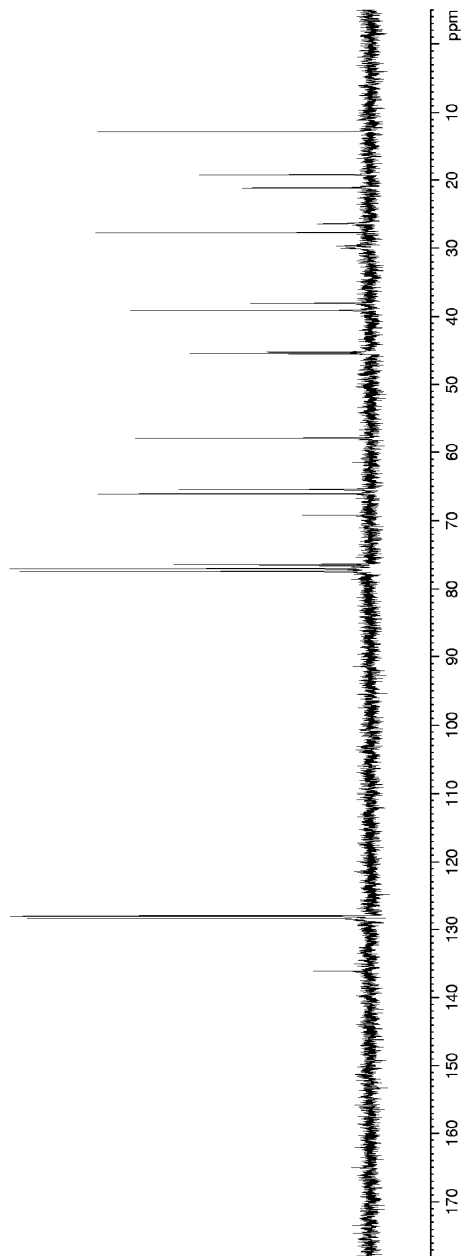

```

NAME      Y5HR437 Ew02 (upper)
EXPNO     1
PROCNO    1
F2 - OCNO 20070227
Date_     17.37
Time      17.37
INSTRUM   spect
PROBHD    5 mm QNP 1H/13
PULPROG   zgpg30
TD         32768
AQ         0.328333
RG         384
AQ         15.82400 usec
SI         6.00 usec
TE         300.0 K
D1         0.13000000 sec

===== CHANNEL f1 =====
NUC1       13
P1         9.30 usec
PL1        0.00 dB
SFO1       300.1314256 MHz
SI         16384
SF         300.1239875 MHz
RG         384
SSB        0
LB         0.0 Hz
GB         0
PC         0.80

```

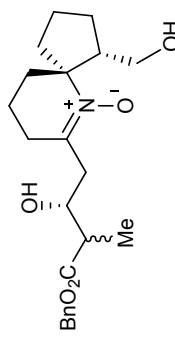

**21**  
 less polar compound

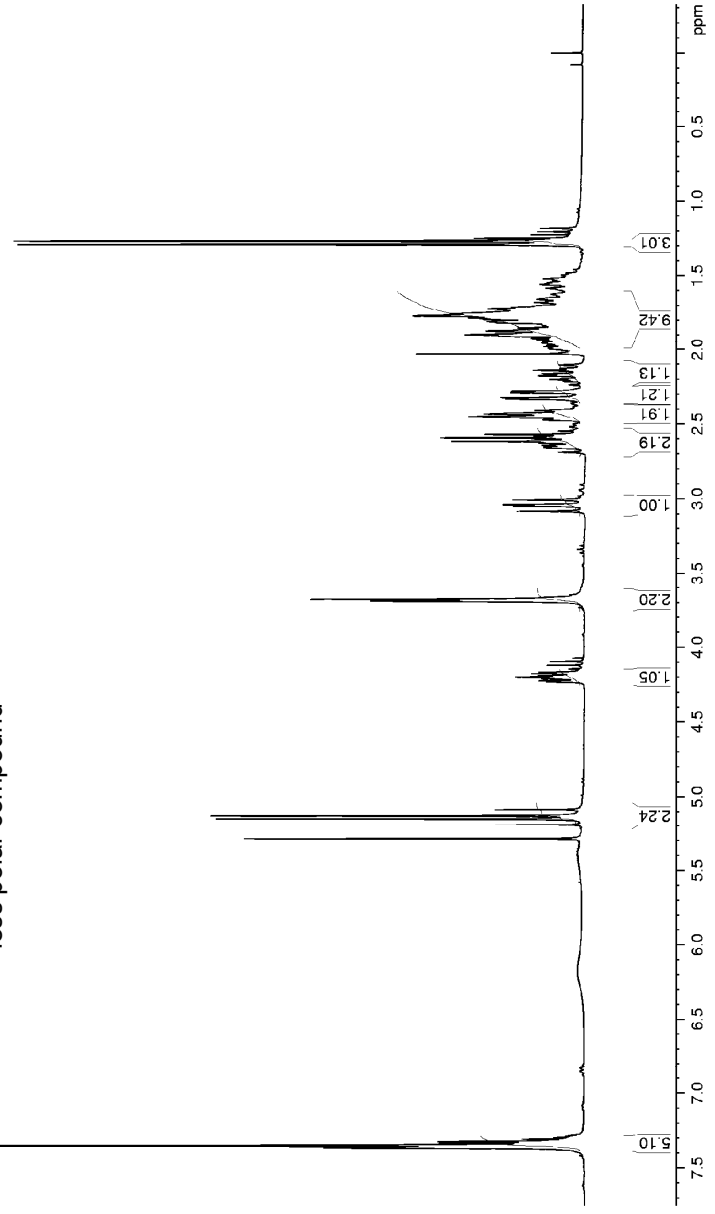

```

NAME          :SIH43/ =wob_ (uppt)
EXPNO        : 1
PROCNO       : 1
Date_        : 20070227
Time         : 17.55
INSTRUM      : spect
PROBHD       : 5 mm QNP 1H/1
PULPROG      : zgpg30
TD           : 65536
SOLVENT      : CDCl3
DS           : 4
SWE          : 17985.61 Hz
FIDRES       : 0.274439 Hz
AQ           : 1.521638 sec
RG           : 27.800 usec
DE           : 20.00 usec
TE           : 300.2 K
DQ           : 0.1700000 sec
SI           : 0.0000000 sec
SF           : 0.0000000 MHz
AQ           : 0.0000000 sec
===== CHANNEL f1 =====
NUC1         : 13C
P1           : 5.44 usec
PL1          : 4.00 dB
SFO1         : 75.475073 MHz
===== CHANNEL f2 =====
CPDPRG2     : waltz16
NUC2         : 1H
PCPD2       : 100.00 usec
PL2         : 0.00 dB
PL12        : 20.00 dB
PL15        : 26.40 dB
SFO2        : 300.1312095 MHz
SI          : 0.0000000 sec
SF          : 75.4577696 MHz
ADW         : 0
SSB         : 0
LB          : 1.00 Hz
GB          : 0
PC          : 0.180

```

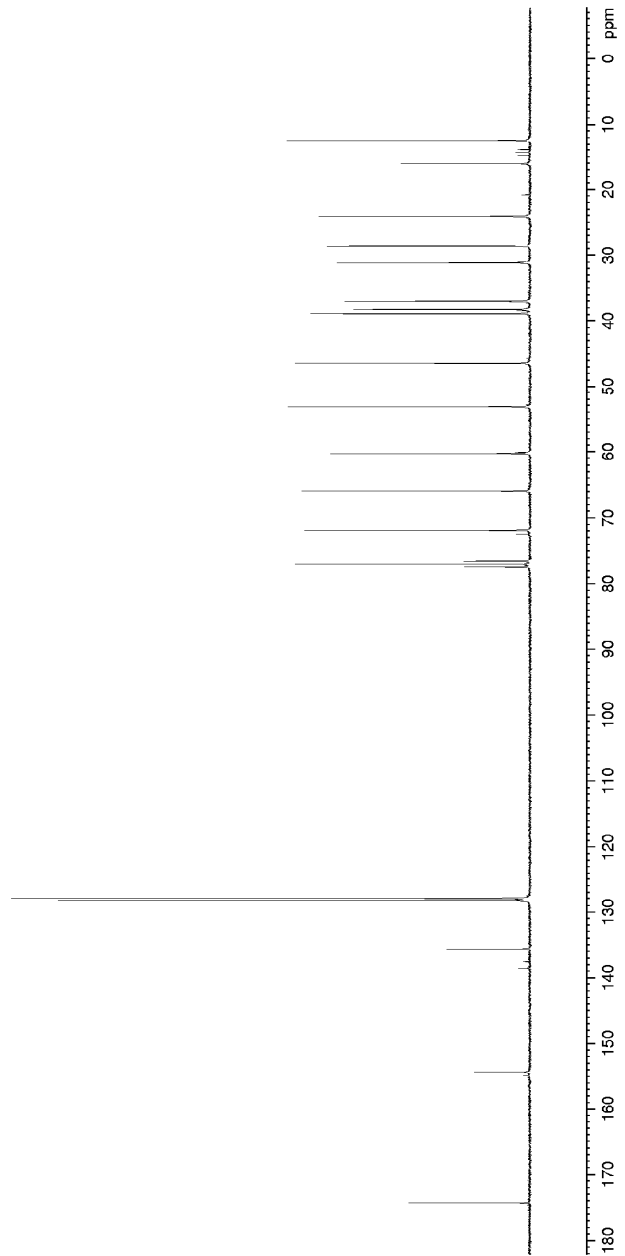



```

NAME: YB173438 F160D
EXPNO: 1
PROCNO: 1
Date_ 20070301
Time: 13:07
INSTRUM: spect
PROBHD: 5 mm QNP 1H/13
PULPROG: zg30
TD: 32768
SOLVENT: CDCl3
NS: 16
DS: 4
AQ: 3156.560 Hz
FIDRES: 0.086331 Hz
AQ: 5.1905012 sec
RG: 22.6
DM: 158.400 usec
DE: 6.00 usec
TE: 300.0 K
D1: 0.10000000 sec

----- CHANNEL f1 -----
NUC1: 1H
P1: 9.30 usec
PL1: 0.00 dB
SFO1: 300.1314256 MHz
SI: 16394
RG: 300.1239735 MHz
NUC2: 13C
P2: 0
PL2: 0.00 dB
SFO2: 101.3250135 MHz
SI: 32768
RG: 300.1239735 MHz
NUC3: 13C
P3: 0
PL3: 0.00 dB
SFO3: 101.3250135 MHz
SI: 32768
RG: 300.1239735 MHz

```

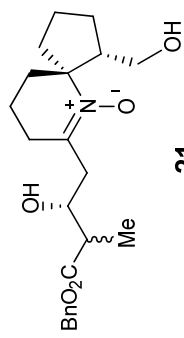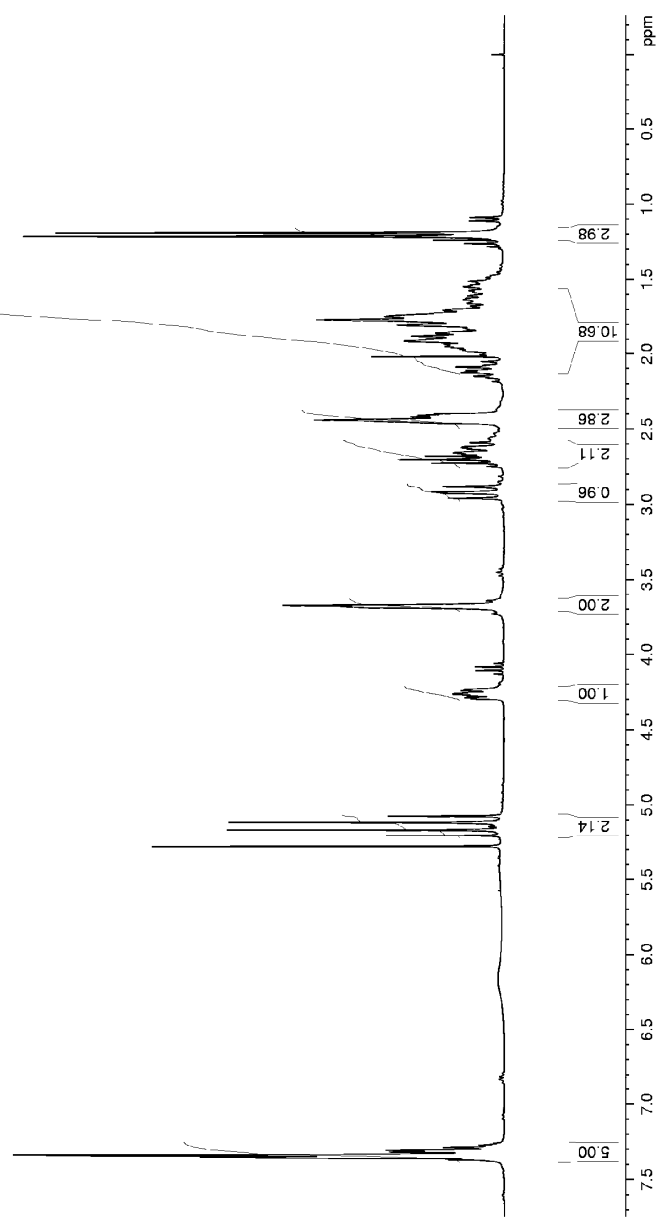

```

NAME          VSHRCL30 t two
PROCNO       1
Date_        20070304
Time         13.21
INSTRUM     spect
PROBHD      5 mm QNP 1H/13
PULPROG     zgpg30
TD          65536
SOLVENT     CDCl3
NS          400
DS          4
AQ          1.7798561 Hz
FIDRES      0.274439 Hz
RG          1.48219608 sec
RW          2.16289
AQ          2.000 usec
RG          300.0 usec
DE          0.17593171 sec
DI          0.0300000 sec
d11         0.0000000 sec
d12         0.0000000 sec

===== CHANNEL f1 =====
NUC1        13C
P1          5.44 usec
PL1         4.00 dB
SFO1        75.768973 MHz

===== CHANNEL f2 =====
CPDPRG2    waltz16
NUC2        1H
P2          100.00 usec
PL2         0.00 dB
SFO2        201.80 MHz
PL12        20.80 dB
PL13        26.40 dB
SFO12       300.1312005 MHz
S1          32.768
S2          50
SSB         0
LB          1.00 Hz
GB          0
LC          0.60

```

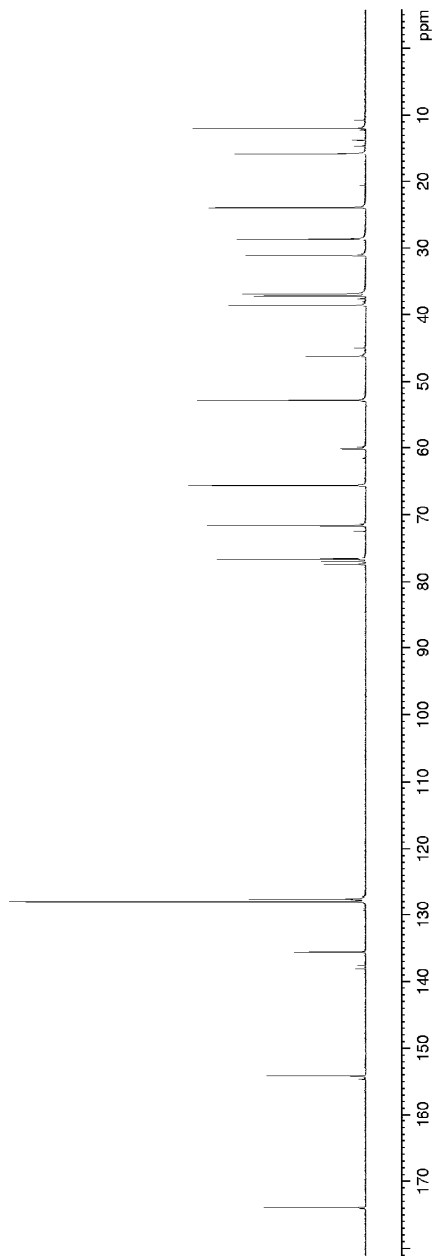

```

NAME: YEU3444 F160D
EXPNO: 1
PROCNO: 1
PULPROG: zgpg30
TD: 65536
SOLVENT: DMSO
AQ: 0.086331 Hz
RG: 28.5
AQ: 5.1905012 sec
RG: 28.5
DM: 158.400 usec
DE: 6.00 usec
TE: 300.0 K
D1: 0.10000000 sec

----- CHANNEL f1 -----
NUC1: 1H
P1: 9.30 usec
PL1: 0.00 dB
SFO1: 300.1314256 MHz
SI: 16394
SF: 300.1300000 MHz
WDW: EM
SSB: 0
LB: 0
GB: 0
PC: 0.80

```

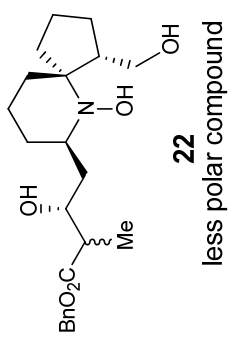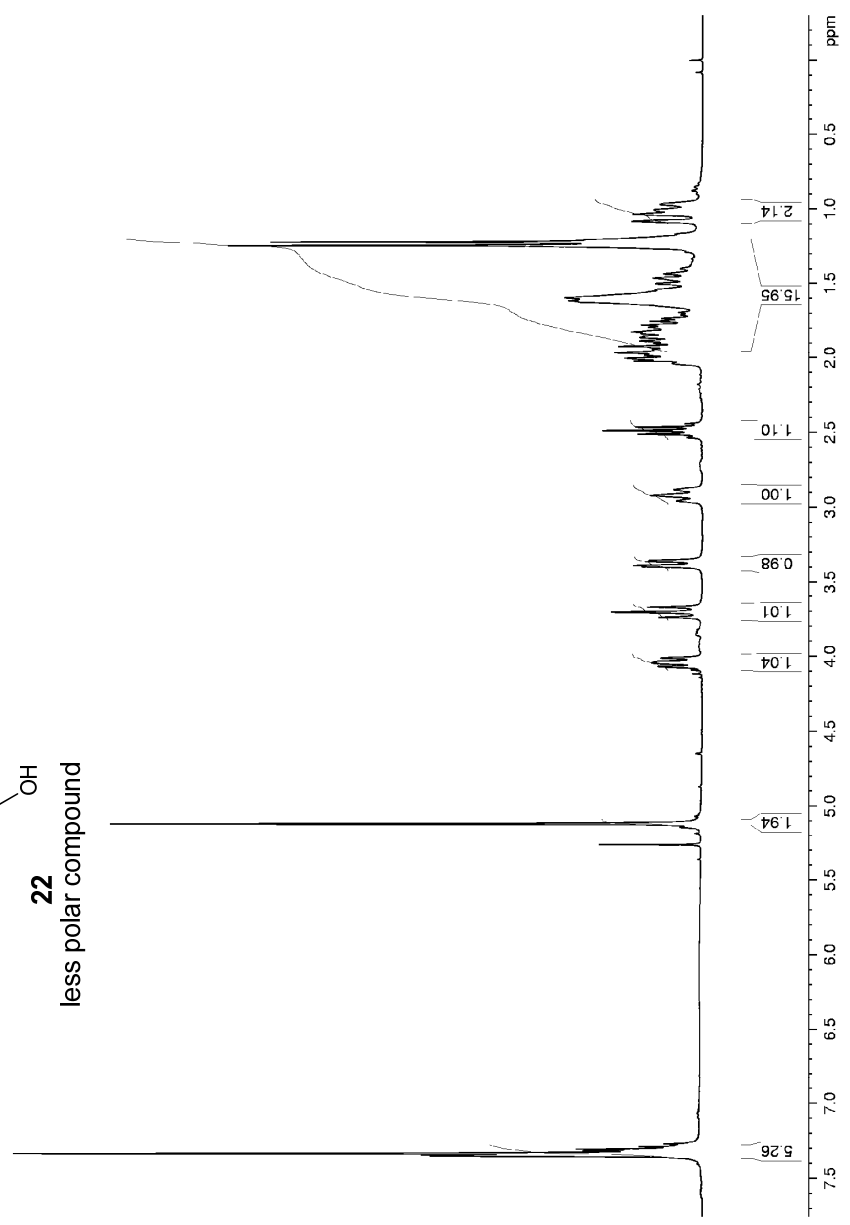

```

NAME          YSHRZ44.two
PROBHD       1
PROCNO      1
Date_       20070309
Time        17:57
INSTRUM     spect
PULPROG     zgpg30
PROBHD      5 mm QNP 1H/13
PULPROG     zgpg30
TD          65536
SOLVENT     CDCl3
NS          300
DS          4
AQ          1.77985610 Hz
FIDRES     0.274439 Hz
RG          1.48219608 sec
RG          1.62894
AQ          27.000 usec
RG          2.000 usec
DE          300.0 usec
DI          0.17593171 sec
d11         0.03000000 sec
d12         0.00002000 sec

===== CHANNEL f1 =====
NUC1        13C
P1          5.44 usec
PL1         4.00 dB
SFO1        75.769973 MHz

===== CHANNEL f2 =====
CPDPRG2    waltz16
NUC2        1H
P2          100.00 usec
PL2         20.00 dB
SFO2        300.1312005 MHz
PL12       20.80 dB
PL13       26.40 dB
SFO12      300.1312005 MHz
S1         32768
S2         65536
RG1M       50
LB         1.00 Hz
GB         0
LC         0.60

```

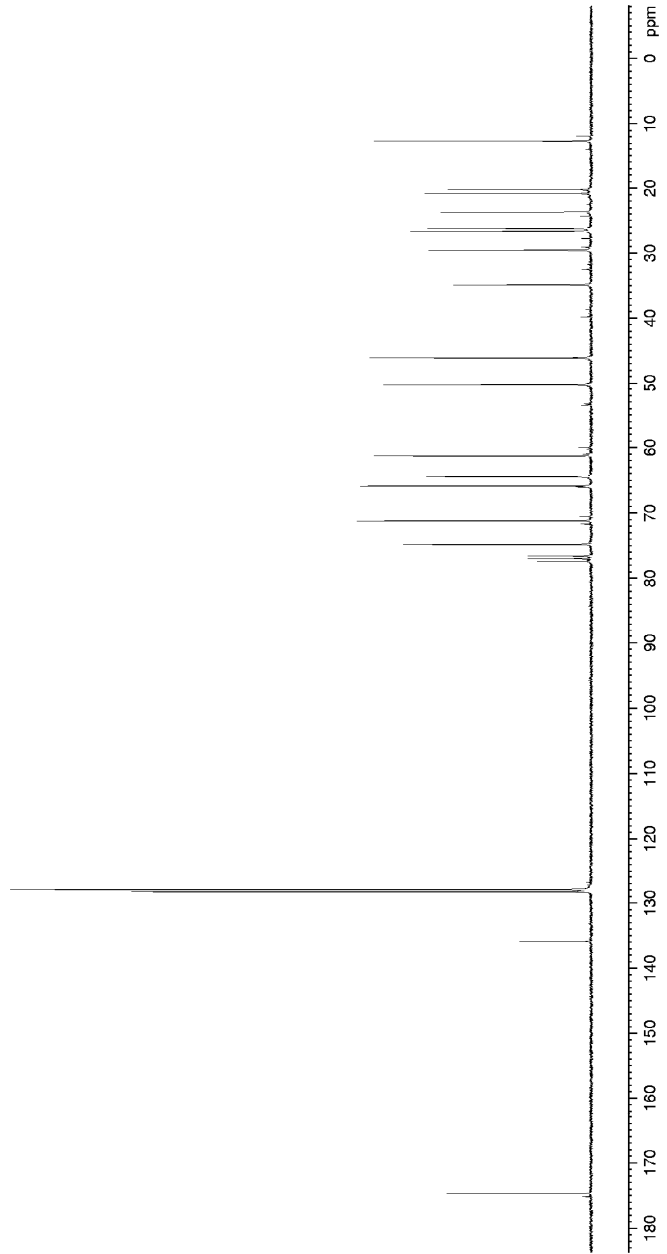

```

NAME: Y813445 F160D
EXPNO: 1
PROCNO: 1
PULPROG: zgpg30
TD: 65536
SOLVENT: CDCl3
AQ: 0.1905012 sec
RG: 256.4
DW: 158.400 usec
DE: 6.00 usec
TE: 300.2 K
D1: 0.10000000 sec
----- CHANNEL f1 -----
NUC1: 1H
P1: 9.30 usec
PL1: 0.00 dB
SFO1: 300.1314256 MHz
SI: 16384
SF: 300.1300000 MHz
WDW: EM
SSB: 0
LB: 0
GB: 0
PC: 1.00

```

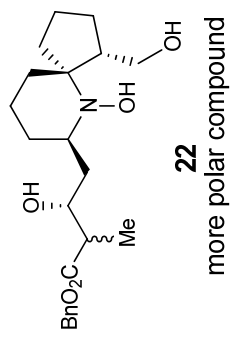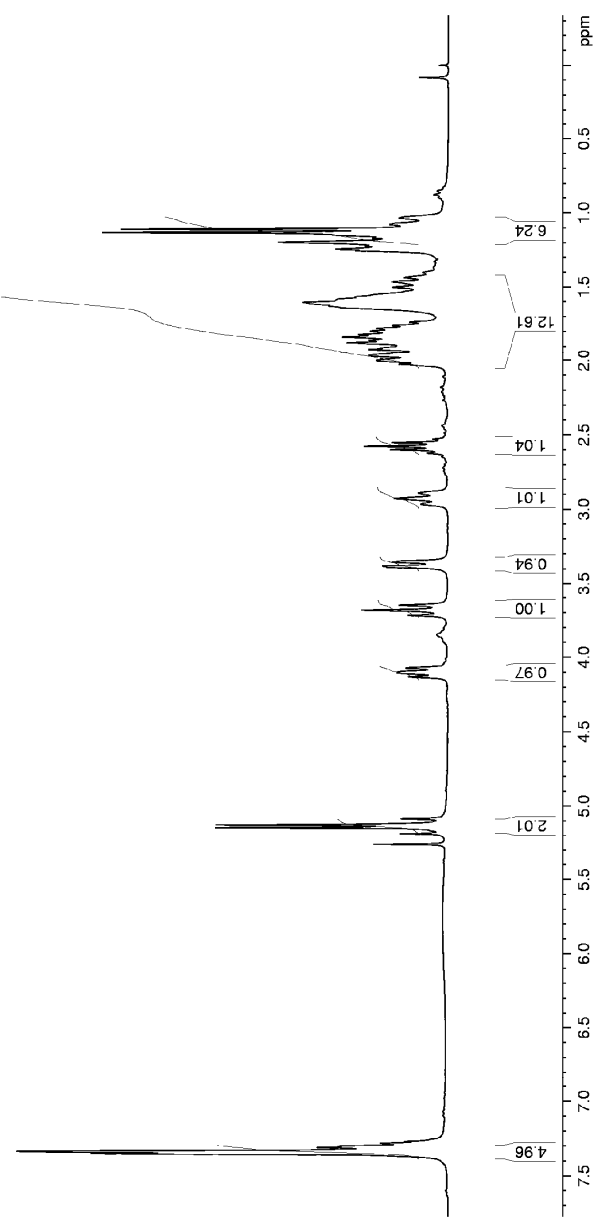

```

NAME          YSHRZ45.two
PROCNO        1
Date_         20070310
Time          16.23
INSTRUM      spect
PROBHD        5 mm QNP 1H/13
PULPROG      zgpg30
TD            65536
SOLVENT      CDCl3
NS            300
DS            4
AQ            1.77985610 Hz
FIDRES       0.274439 Hz
RG            1.48219608 sec
RG            1.62894
AQ            27.000 usec
RG            2.000 usec
DE            300.0 usec
DI            0.17593171 sec
d11           0.03000000 sec
d12           0.00002000 sec

===== CHANNEL f1 =====
NUC1          13C
P1            5.44 usec
PL1           4.00 dB
SFO1          75.7760973 MHz

===== CHANNEL f2 =====
CPDPRG2      waltz16
NUC2          1H
P2           100.00 usec
PL2           0.00 dB
SFO2          300.1312005 MHz
PL12         20.80 dB
PL13         26.40 dB
SFO12        300.1312005 MHz
S1           32768
S2           32768
RG1M         20
SSB          0
LB           1.00 Hz
GB           0
LC           1.00

```

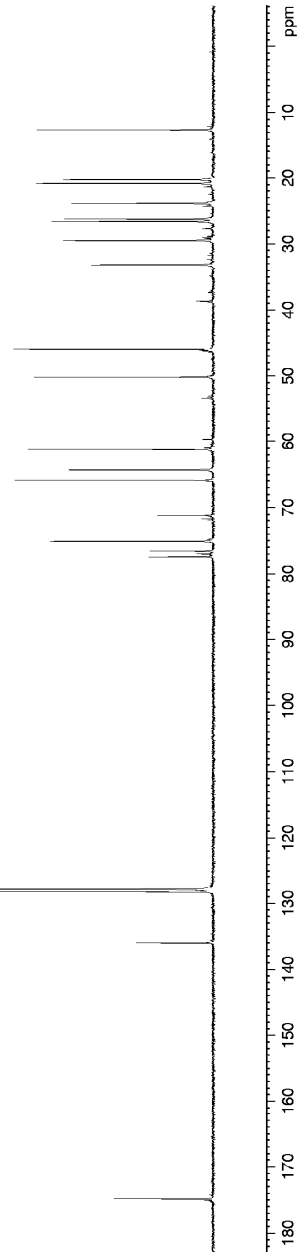

```

NAME: Y813448 F160D
EXPNO: 1
PROCNO: 1
PULPROG: zgpg30
TD: 65536
SOLVENT: CDCl3
AQ: 4.9545717 sec
RG: 96.5
DW: 151.200 usec
DE: 6.00 usec
TE: 300.2 K
D1: 0.10000000 sec
----- CHANNEL f1 -----
NUC1: 1H
P1: 9.30 usec
PL1: 0.00 dB
SFO1: 300.1313505 MHz
SI: 16394
RG: 96.5
WDW: EM
SSB: 0
LB: 0
GB: 0
PC: 0.80

```

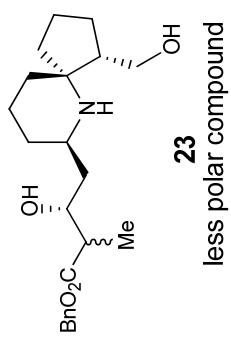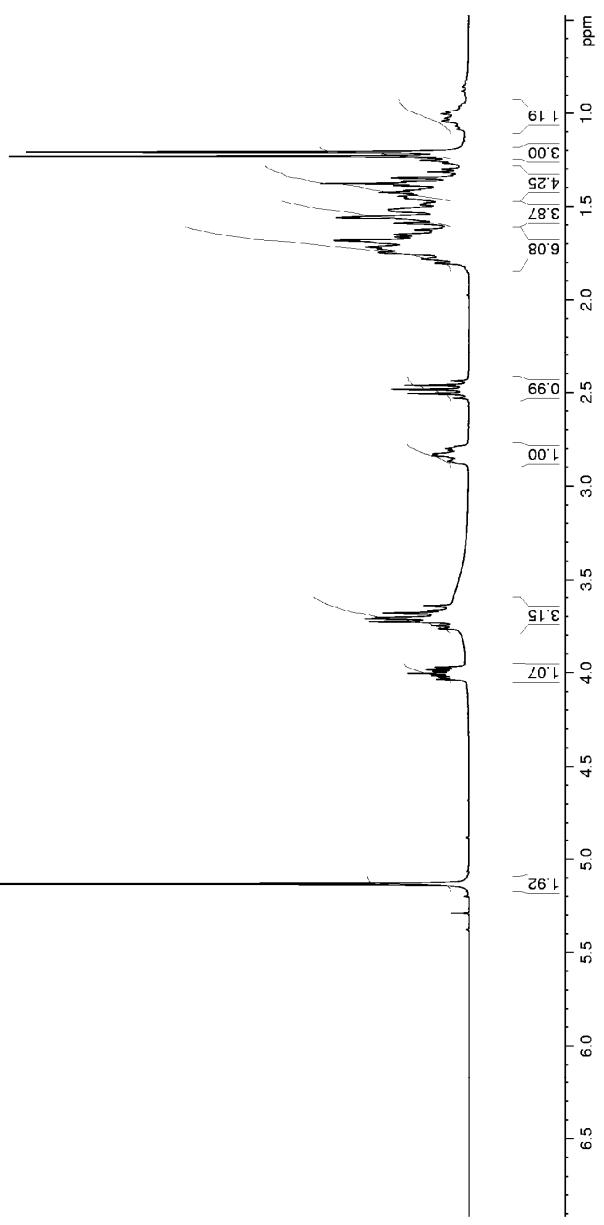

```

NAME          YSHRCL48 t.w.o
PROCNO       1
Date_        20070316
Time         18:37
INSTRUM     spect
PROBHD      5 mm QNP 1H/13
PULPROG     zgpg30
TD          65536
SOLVENT     CDCl3
NS          400
DS          4
AQ          1.77985610 Hz
FIDRES      0.274439 Hz
RG          1.48219608 sec
RG          1.62894
AQ          27.000 usec
RG          2.000 usec
DE          300.0 usec
DI          0.17593171 sec
d11         0.03000000 sec
d12         0.00002000 sec

===== CHANNEL f1 =====
NUC1        13C
P1          5.44 usec
PL1         4.00 dB
SFO1        75.768973 MHz

===== CHANNEL f2 =====
CPDPRG2     waltz16
NUC2        1H
P2          100.00 usec
PL2         0.00 dB
SFO2        201.80 MHz
PL12        20.80 dB
PL13        26.40 dB
SFO12       300.1312005 MHz
S1          32768
S2          32768
RG1         20
RG2         20
LB          1.00 Hz
GB          1.00
UC

```

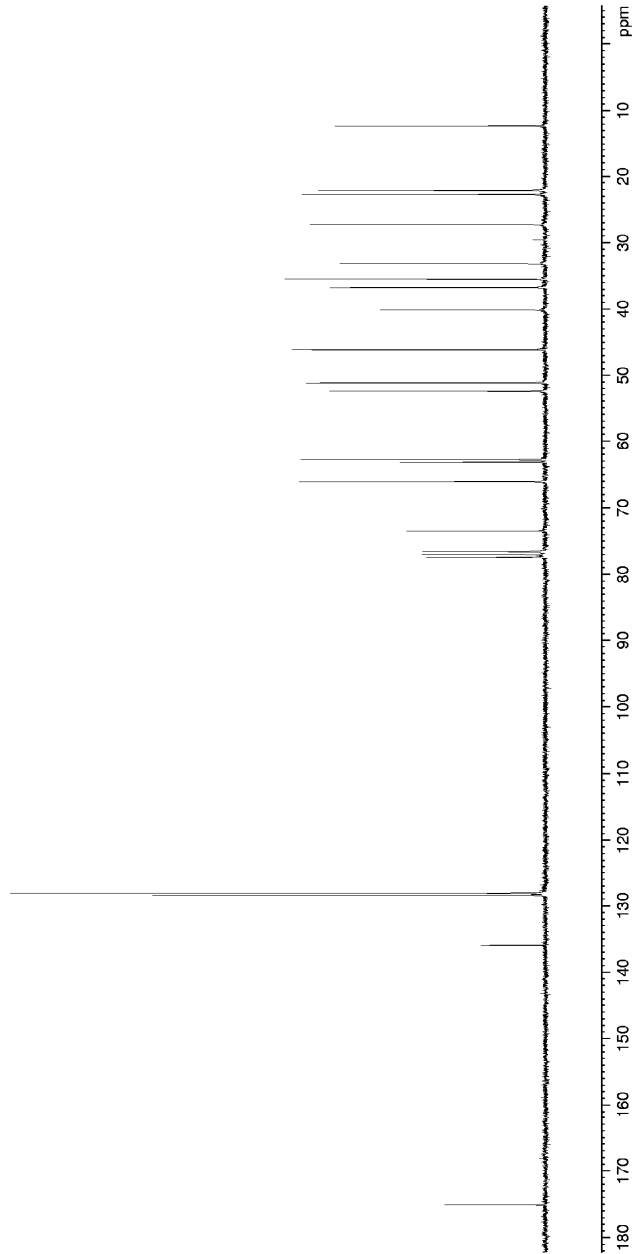



```

NAME: YEU3454 F160D
EXPNO: 1
PROCNO: 1
Date_ 20070321
Time: 19:23
INSTRUM: spect
PROBHD: 5 mm QNP 1H/13
PULPROG: zg30
IC: 32768
SOLVENT: cdcl3
NS: 16
DS: 4
SWH: 3156.560 MHz
FIDRES: 0.086331 Hz
AQ: 5.1905012 sec
RG: 35.9
DM: 158.400 usec
DE: 6.00 usec
TE: 300.0 K
D1: 0.10000000 sec

----- CHANNEL f1 -----
NUC1: 1H
P1: 9.30 usec
PL1: 0.00 dB
SFO1: 300.1314256 MHz
SI: 16384
WDW: EM
SSB: 0
LB: 0
GB: 0
EC: 0

```

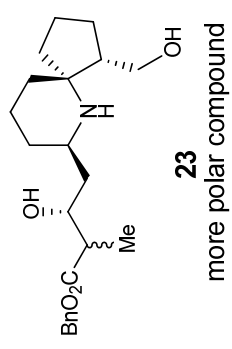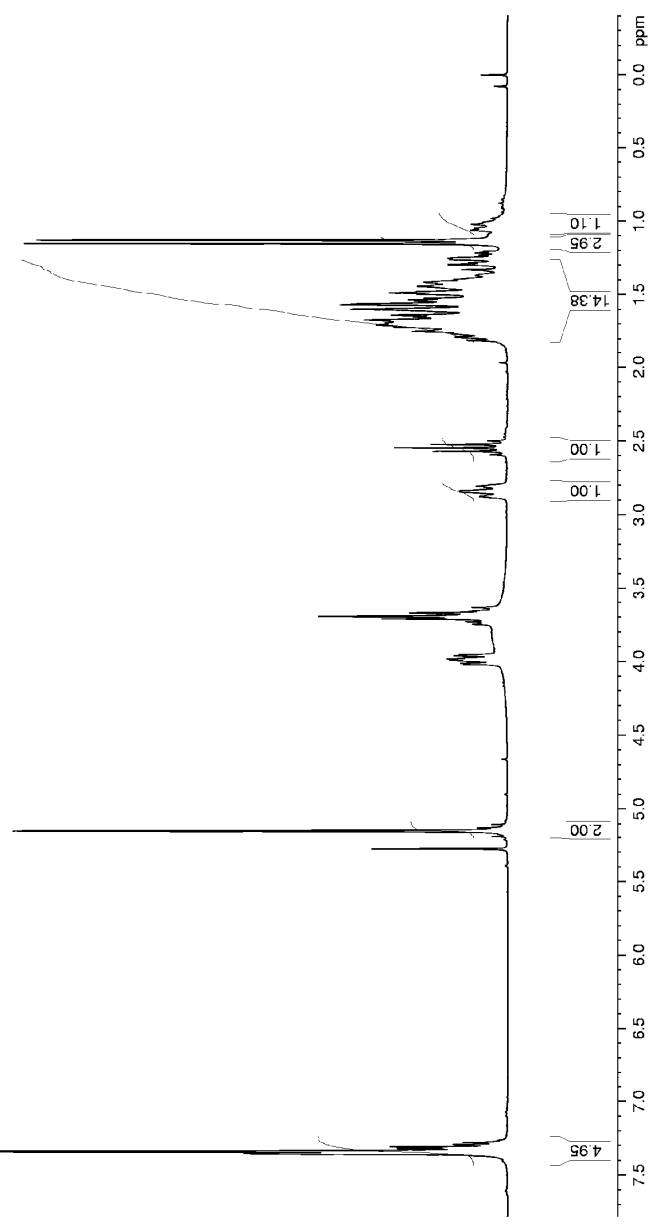

```

NAME          YSHR454_2.mw
PROCNO       1
Date_        20070322
Time         19.34
INSTRUM     spect
PROBHD      5 mm QNP 1H/13
PULPROG     zgpg30
TD          65536
SOLVENT     CDCl3
NS          300
DS          4
AQ          1.77985610 Hz
FIDRES      0.274439 Hz
RG          1.48219608 sec
RG          1.62894
AQ          2.70000000 sec
RG          2.00000000 sec
RG          300.00
RG          300.00
D1          0.17599171 sec
d11         0.03000000 sec
d12         0.00002000 sec
===== CHANNEL f1 =====
NUC1        13C
P1          5.44 usec
PL1         4.00 dB
SFO1        75.776973 MHz
===== CHANNEL f2 =====
CPDPRG2     waltz16
NUC2        1H
P2          100.00 usec
PL2         0.00 dB
SFO2        201.80 MHz
PL12        20.80 dB
PL13        26.40 dB
SFO12       300.1312005 MHz
S1          32768
S2          32768
RG1M        50
SSB         0
LB          1.00 Hz
GB          0
LC          0.60

```

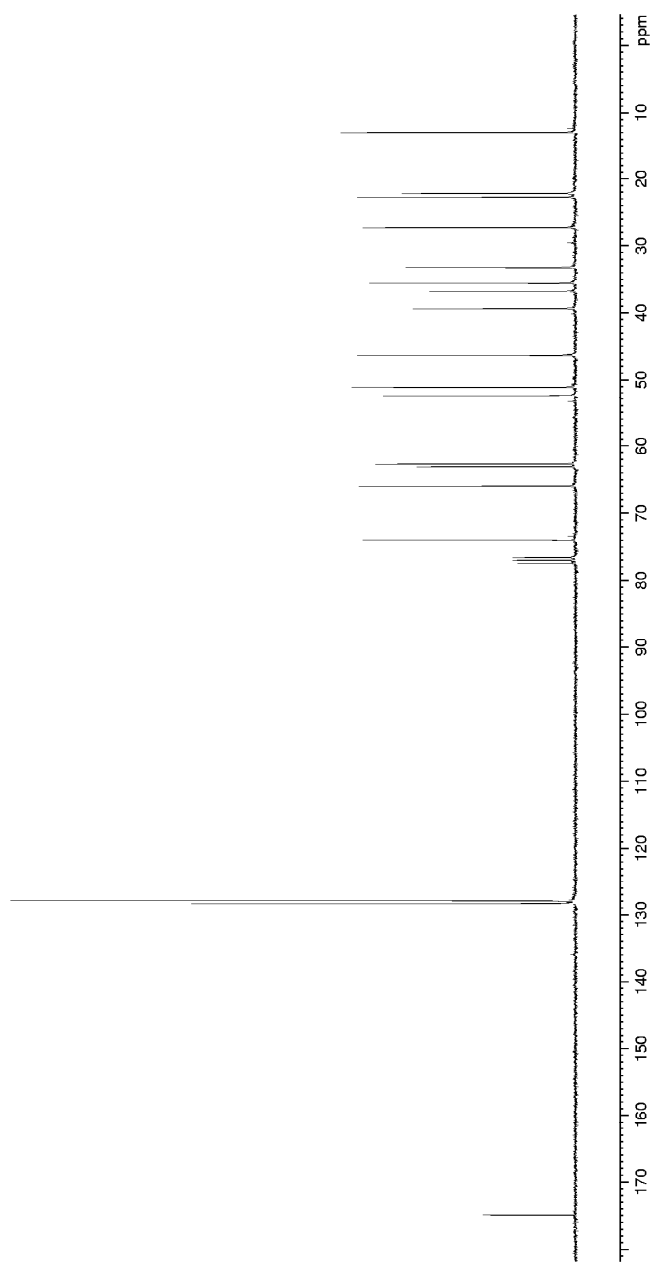

NAME: YEU366\_1.mxd  
 EXENO: 1  
 PROCNO: 1  
 FILE: 20071211  
 TIME: 13:24  
 INSTRUM: spect  
 PROBDI: 5 mm QNP 1H/13  
 PULPROG: zg30  
 TD: 32768  
 SOLVENT: cdcl3  
 NS: 16  
 DS: 4  
 SWH: 4464.179 Hz  
 FIDRES: 0.22339 Hz  
 AQ: 3.527797 sec  
 RG: 45.3  
 DW: 107.200 usec  
 DE: 6.00 usec  
 TE: 300.2 K  
 D1: 6.1000000 sec  
 D10: 1

CHANNEL f1  
 NUC1: 1H  
 P1: 9.30 usec  
 PL1: 0.00 dB  
 SFO1: 300.1321759 MHz  
 SF: 16839.9  
 RF: 300.1300000 MHz  
 KW: 2W  
 SSB: 0  
 LB: 0.10 Hz  
 GB: 0  
 PC: 0.80

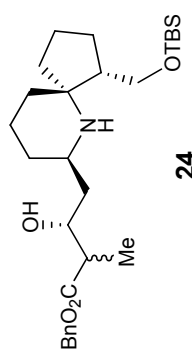

**24**

less polar compound

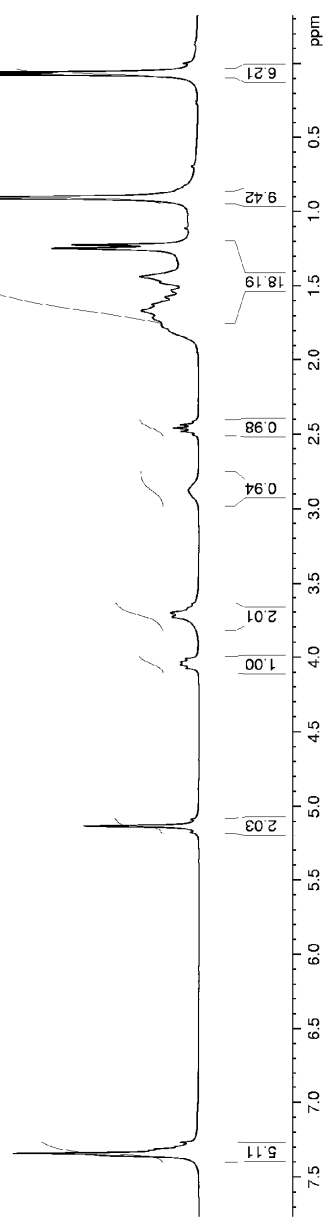



```

NAME: YB17123 F160D
EXPNO: 1
PROCNO: 1
PULPROG: zgpg30
TD: 32768
SOLVENT: CDCl3
AQ: 2.6477644 sec
RG: 16
DM: 80.800 usec
DE: 5.50 usec
TE: 300.0 K
D1: 0.10000000 sec
----- CHANNEL f1 -----
NUC1: 1H
P1: 14.40 usec
PL1: 2.20 dB
SFO1: 400.1329009 MHz
SI: 16394
SF: 400.1299954 MHz
WDW: EM
SSB: 0
LB: 0
GB: 0
PC: 0.80

```

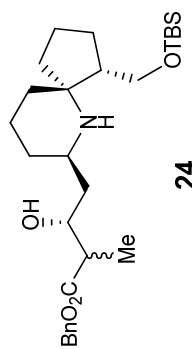

**24**  
more polar compound

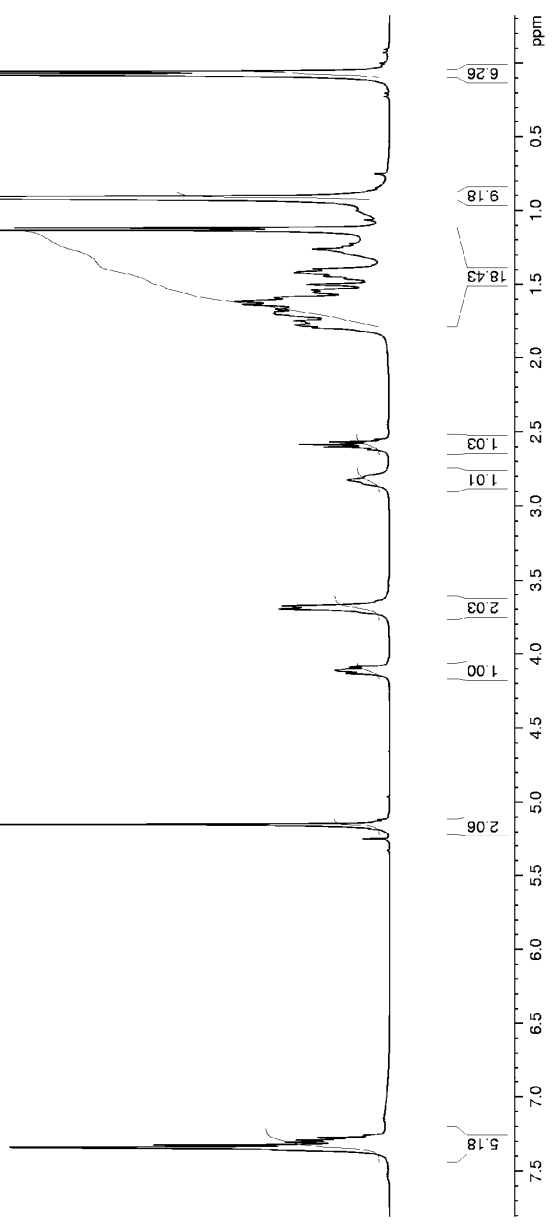

```

NAME          VSHR723 (two)
PROCNO       1
Date_        20080219
Time         12.18
INSTRUM     spect
PROBHD      5 mm DDO QNP
PULPROG     zgpg30
TD          65536
SOLVENT     CDCl3
NS          200
DS          4
AQ          24038.460 Hz
FIDRES      0.366798 Hz
RG          1.3631988 sec
RG          6502
AQ          20.000000 sec
DE          300.0
TE          300.0
D1          0.63154089 sec
d11         0.03000000 sec
d12         0.00002000 sec

===== CHANNEL f1 =====
NUC1        13C
P1          5.00 usec
PL1         -1.50 dB
SFO1        100.6239967 MHz

===== CHANNEL f2 =====
CPDPRG2     waltz16
NUC2        1H
P2          100.00 usec
PL2         19.10 dB
PL12        19.10 dB
PL13        22.10 dB
SFO2        400.1318000 MHz
SI          32768
SF          100.6127710 MHz
RG          30
SSB         0
LB          2.00 Hz
GB          0
LC          0.60

```

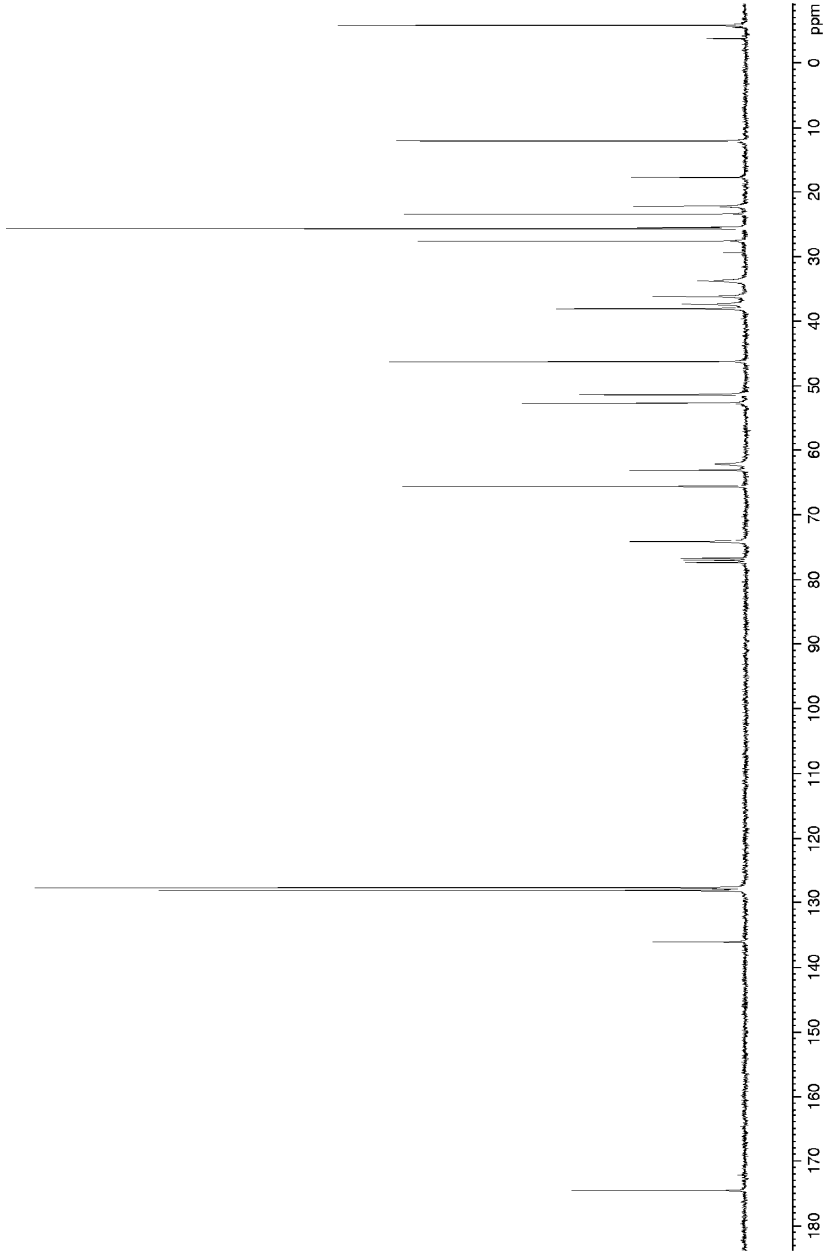

```

NAME: YB13520 F160D
EXPNO: 1
PROCNO: 1
PULPROG: zgpg30
TD: 65536
SOLVENT: CDCl3
AQ: 2.6477644 sec
RG: 35.9
DM: 80.800 usec
DE: 6.50 usec
TE: 300.2 K
D1: 0.10000000 sec
----- CHANNEL f1 -----
NUC1: 1H
P1: 14.40 usec
PL1: 2.20 dB
SFO1: 400.1329609 MHz
SI: 16384
SF: 400.1300121 MHz
WDW: EM
SSB: 0
LB: 0
GB: 0
PC: 0.80

```

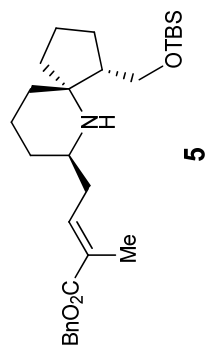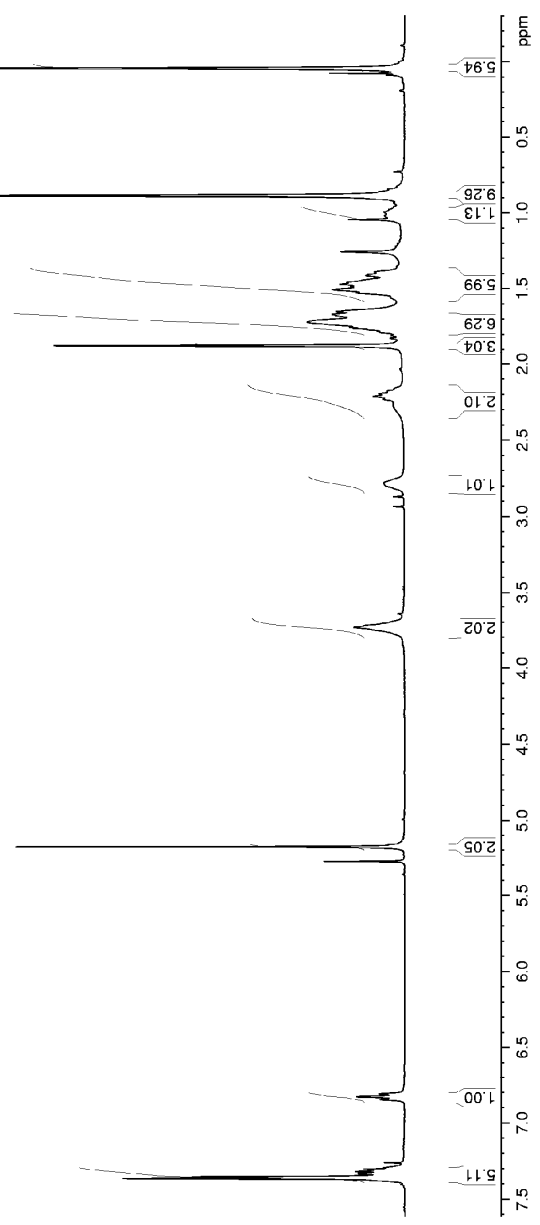

```

NAME          YSHR520 t=07
PROCNO        1
Date_         20070717
Time         12.36
INSTRUM      spect
PULPROG      zgpg30
TD            65536
SOLVENT      CDCl3
NS            400
DS            4
AQ            24038.460 Hz
FIDRES       0.366798 Hz
RG            1.3631988 sec
RG            9195.2
AQ            20.600 usec
RG            6.600 usec
DE            300.0 usec
DI            0.63154089 sec
d11           0.0300000 sec
d12           0.0002000 sec

===== CHANNEL f1 =====
NUC1          13C
P1            5.00 usec
PL1           -1.50 dB
SFO1          100.623967 MHz

===== CHANNEL f2 =====
CPDPRG2      waltz16
NUC2          1H
P2           100.00 usec
PL2           -1.50 dB
SFO2          499.132433 MHz
PL12          19.10 dB
PL13          22.10 dB
SFO2          400.1318000 MHz
SI            32768
SF            100.6127750 MHz
RG            50
SSB           0
LB            2.00 Hz
GB            0
LC            0.60

```

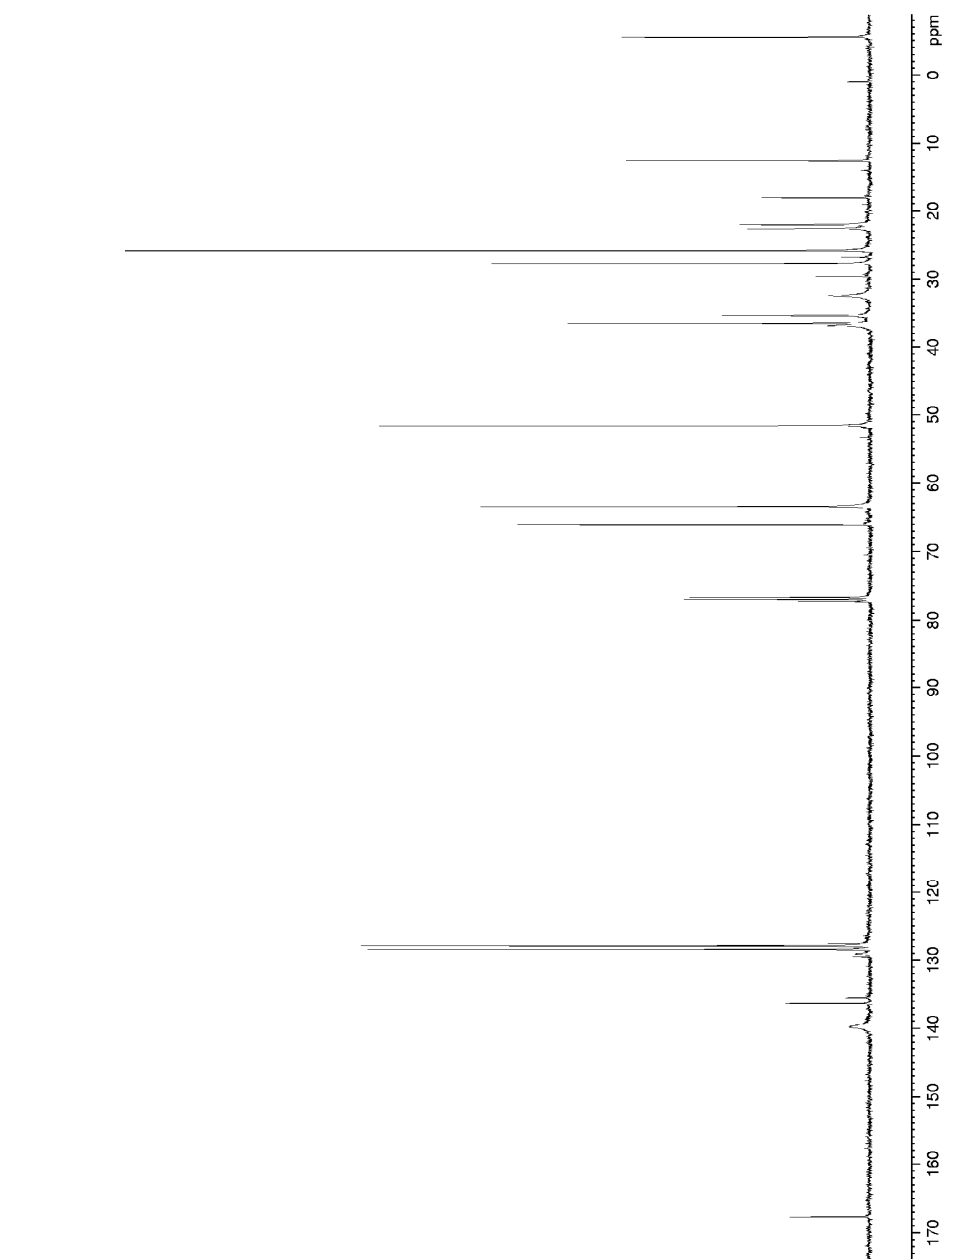



NAME: Aree-9 | 1SePh  
 EXENO: 1  
 PROCNO: 20080611  
 FILE: 01128  
 INSTRUM: spect  
 PROBDI: 5 mm QNP 1H/13  
 PULPROG: zg30  
 IC: 32768  
 SOLVENT: cdcl3  
 NS: 16  
 DS: 4  
 SWH: 4464.179 Hz  
 FIDRES: 0.22339 Hz  
 AQ: 3.527797 sec  
 RG: 46.3  
 DW: 107.200 usec  
 DE: 6.00 usec  
 TE: 300.2 K  
 TD: 6.1000000 sec  
 LDO: 1

----- CHANNEL f1 -----  
 NUC1: 1H  
 P1: 11.90 usec  
 PL1: 1.90 dB  
 SFO1: 300.1321759 MHz  
 SF: 163.84  
 SW: 300.1300000 MHz  
 WDW: EM  
 SSB: 0  
 LB: 0.10 Hz  
 GB: 0  
 PC: 0.80

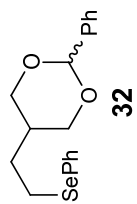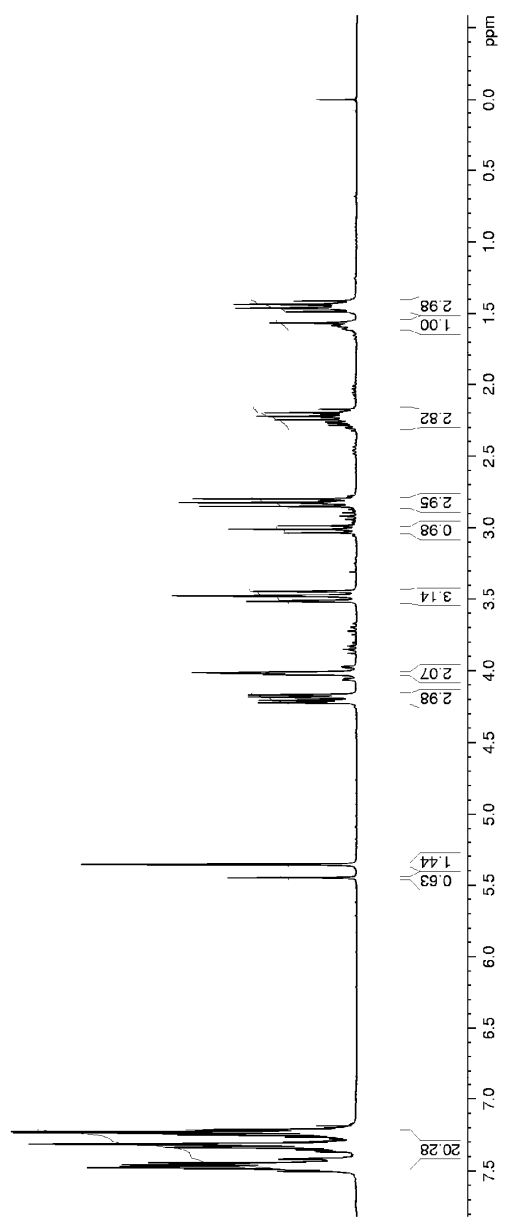

NAME Acetals1 H5a-F1  
 PROCNO 1  
 Date\_ 20080617  
 Time 21:51  
 INSTRUM spect  
 PULPROG zgpg30  
 TD 65536  
 SOLVENT CDCl3  
 NS 5000  
 DS 4  
 SWH 71985.61 Hz  
 FIDRES 0.274439 Hz  
 AQ 1.4219608 sec  
 RG 16384  
 DW 21.000 usec  
 DE 300.2 usec  
 TE 300.2 K  
 D1 0.17593171 sec  
 d11 0.03000000 sec  
 DELTA 0.07593171 sec  
 TD0 1

===== CHANNEL f1 =====  
 NU1 13C  
 P1 5.44 usec  
 PL 0.00 dB  
 SF01 75.4763973 MHz

===== CHANNEL f2 =====  
 CDERGZ waltz16  
 NU2 100.62 usec  
 PL2 1.90 dB  
 PL12 23.80 dB  
 PL13 26.40 dB  
 SF02 300.132005 MHz  
 SF 75.4677656 MHz  
 WDW 5M  
 SSB 0  
 LB 1.00 Hz  
 GB 0  
 PC 0.00

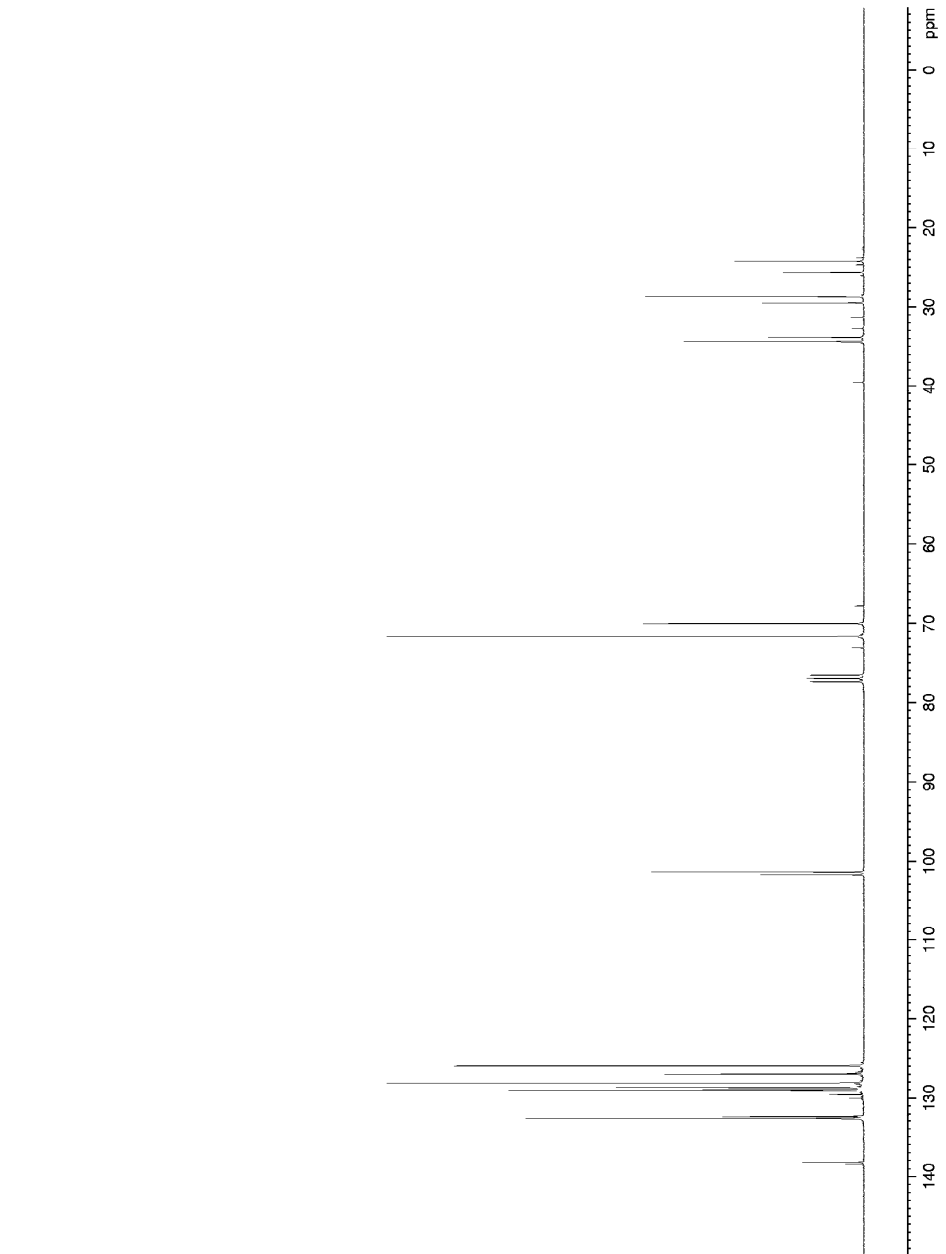

```

NAME: YBUT21 / 1*60D
EXPNO: 1
PROCNO: 1
Date_
Time: 20060311
INSTRUM: spect
PROBHD: 5 mm QNP 1H/13
PULPROG: zg30
TD: 32768
SOLVENT: CDCl3
NS: 16
DS: 4
AQ: 4464.179 Hz
FIDRES: 0.002339 Hz
AQ: 3.527797 sec
RG: 28.5
DM: 107.200 usec
DE: 6.00 usec
TE: 300.0 K
D1: 6.1000000 sec

----- CHANNEL f1 -----
NUC1: 1H
P1: 9.50 usec
PL1: 1.00 dB
SFO1: 300.1321759 MHz
SI: 16394
AFW: 300.129976 MHz
SSB: 0
LB: 0
GB: 0
PC: 0.60

```

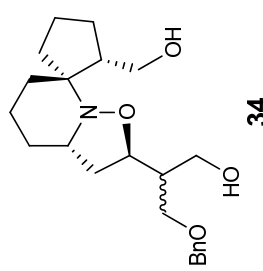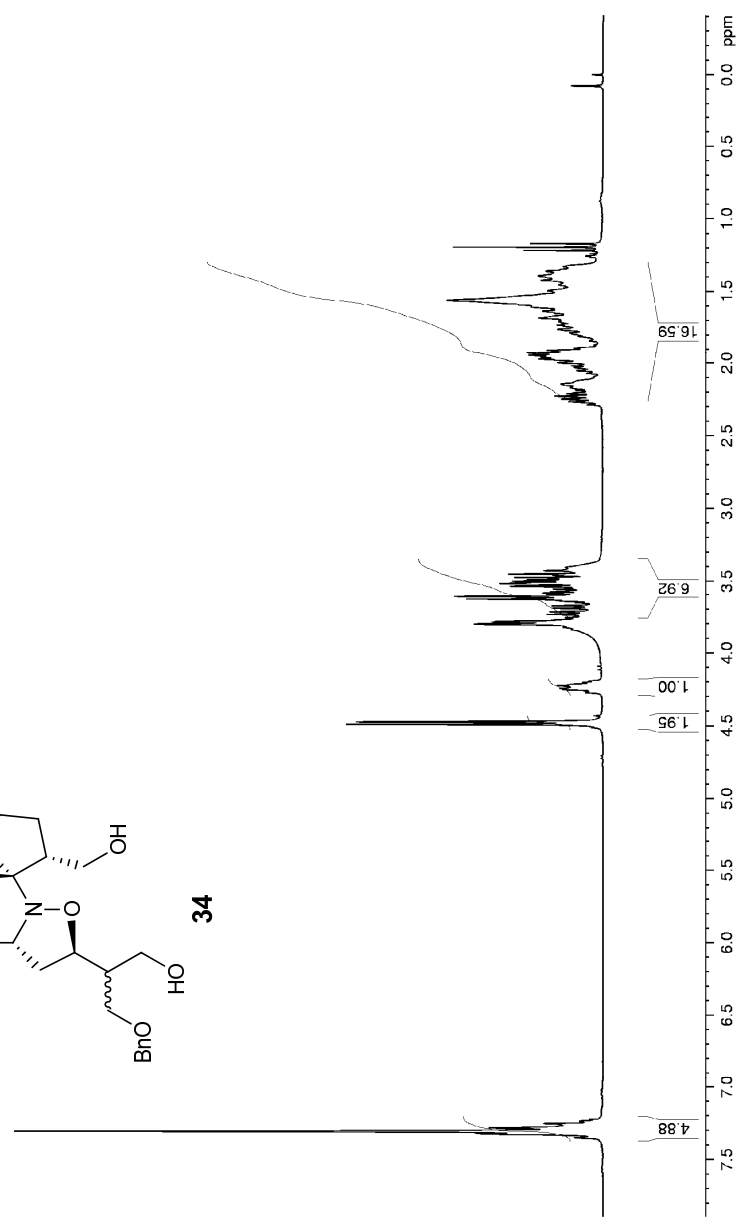

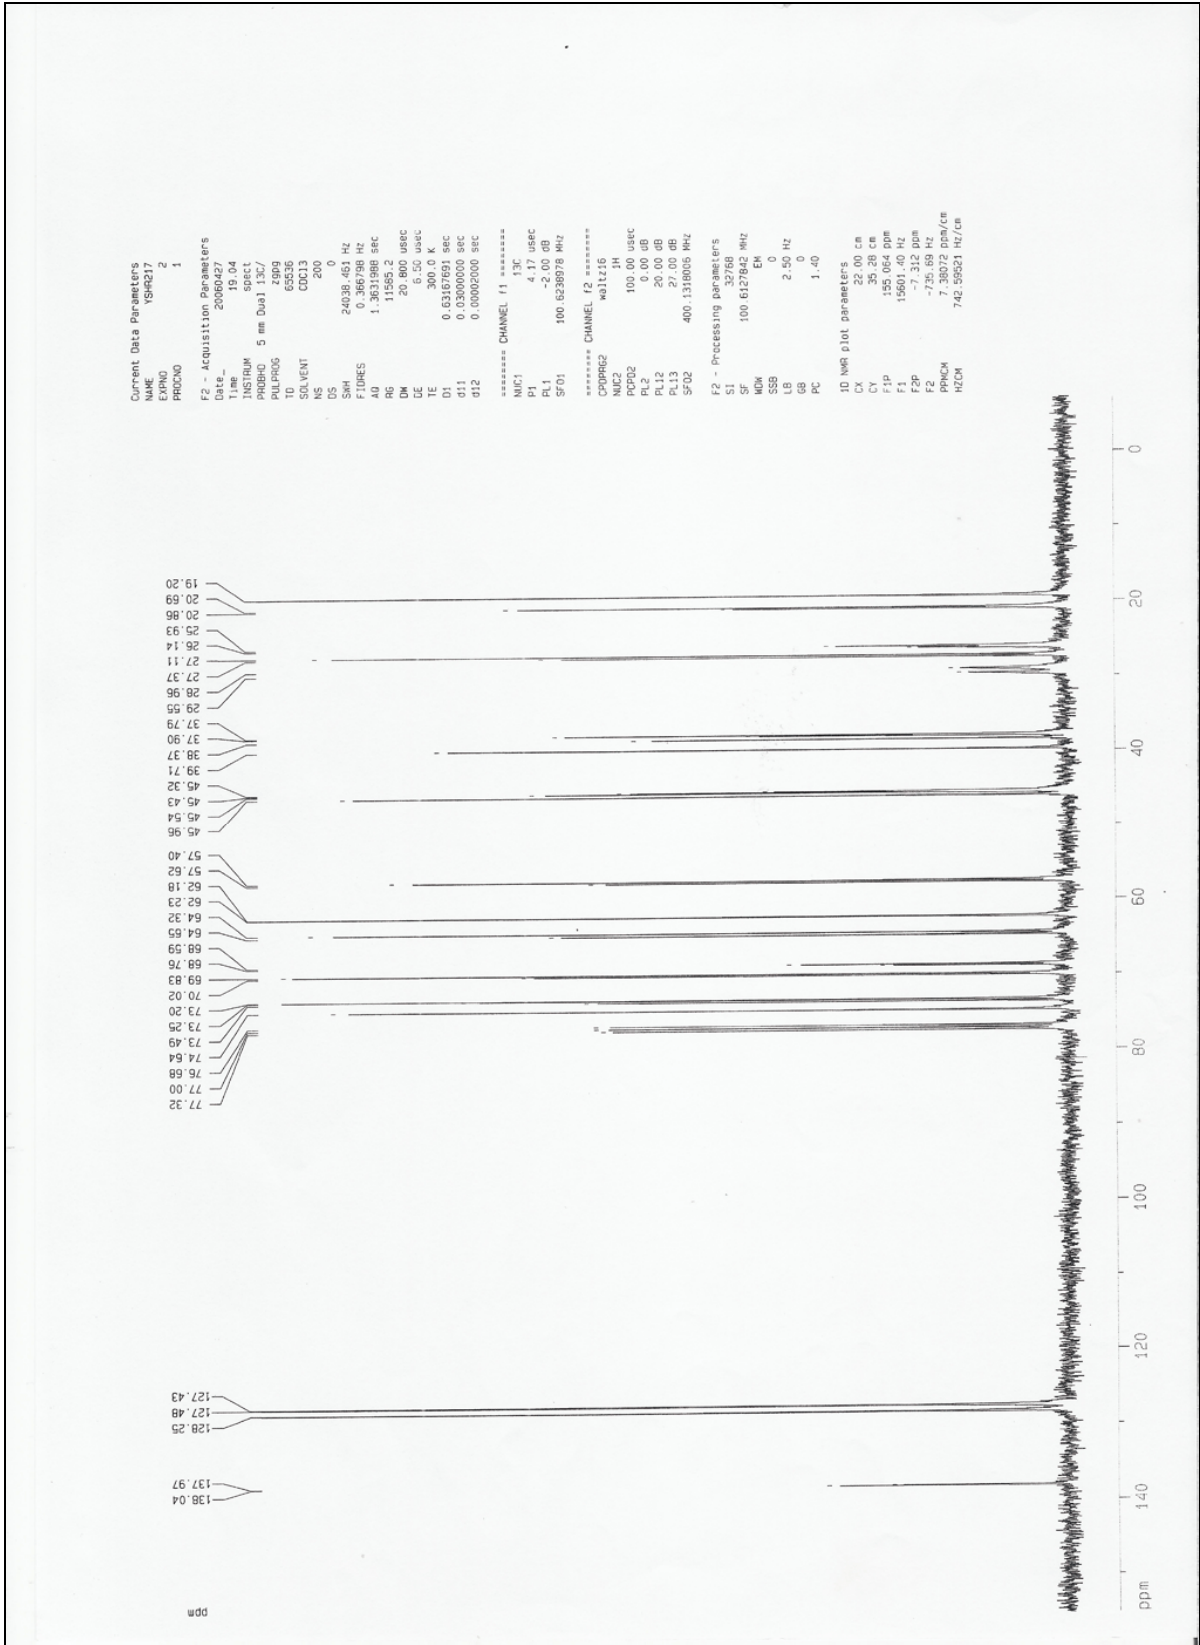

```

NAME: Y51R249 - rt spot
EXPNO: 1
PROCNO: 1
PULPROG: zgpg30
TD: 65536
SOLVENT: CDCl3
AQ: 0.02339 Hz
RG: 3.527797 sec
F2 - F1: 4664.179 MHz
FIDRES: 0.002339 Hz
AQ: 3.527797 sec
RG: 45.3
DM: 107.200 usec
DE: 6.00 usec
TE: 300.0 K
D1: 0.10000000 sec
----- CHANNEL f1 -----
NUC1: 1H
P1: 9.50 usec
PL1: 1.00 dB
SFO1: 300.1321759 MHz
SI: 16384
SF: 300.1300136 MHz
WDW: EM
SSB: 0
LB: 0
GB: 0
PC: 0.80

```

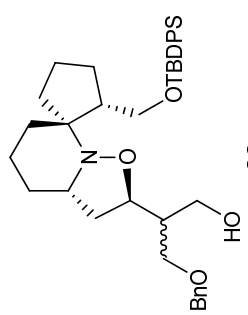

**28**  
less polar compound

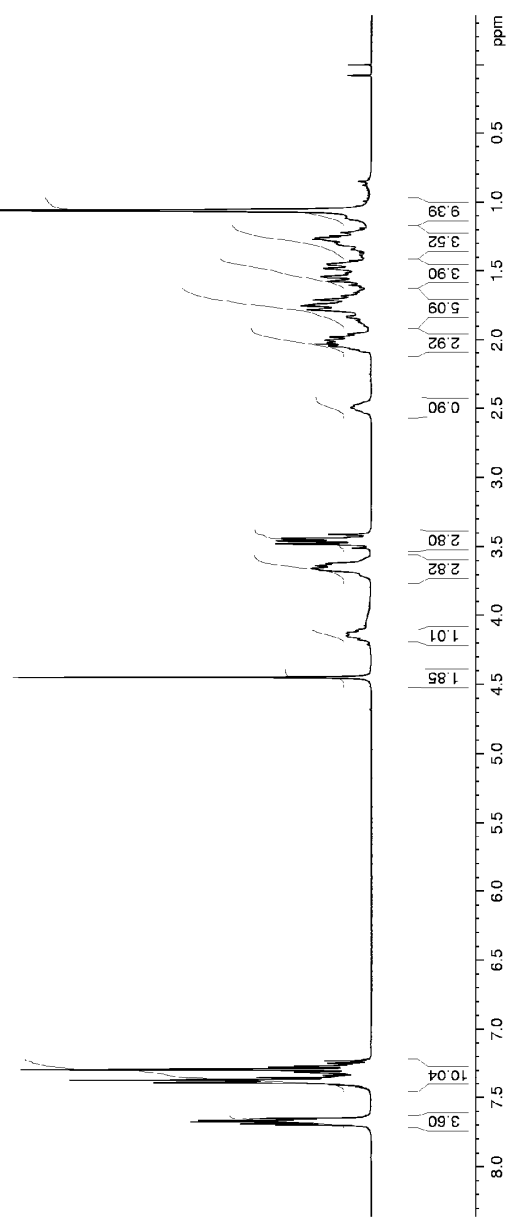

```

NAME      YSHR219 1st spot
PROCNO    1
Date_     20080115
Time      18:56
INSTRUM   spect
PROBHD    5 mm QNP 1H/13
PULPROG   zgpg30
TD         65536
SOLVENT    CDCl3
NS         200
DS         4
AQ         1.7985610 Hz
FIDRES    0.274439 Hz
RG         1.48219608 sec
RG         1.62894
AQ         27.000 usec
RG         300.0 usec
RG         300.0 usec
D1         0.1759171 sec
d11        0.0300000 sec
d12        0.0002000 sec

===== CHANNEL f1 =====
NUC1       13C
P1         5.00 usec
PL1        6.00 dB
SFO1       75.769973 MHz

===== CHANNEL f2 =====
CPDPRG2   waltz16
NUC2       1H
P2         100.00 usec
PL2        19.00 dB
SFO2       300.1312005 MHz
=====
SFO1       75.677734 MHz
=====
RG         30
LB         1.00 Hz
GB         0
LC         1.00

```

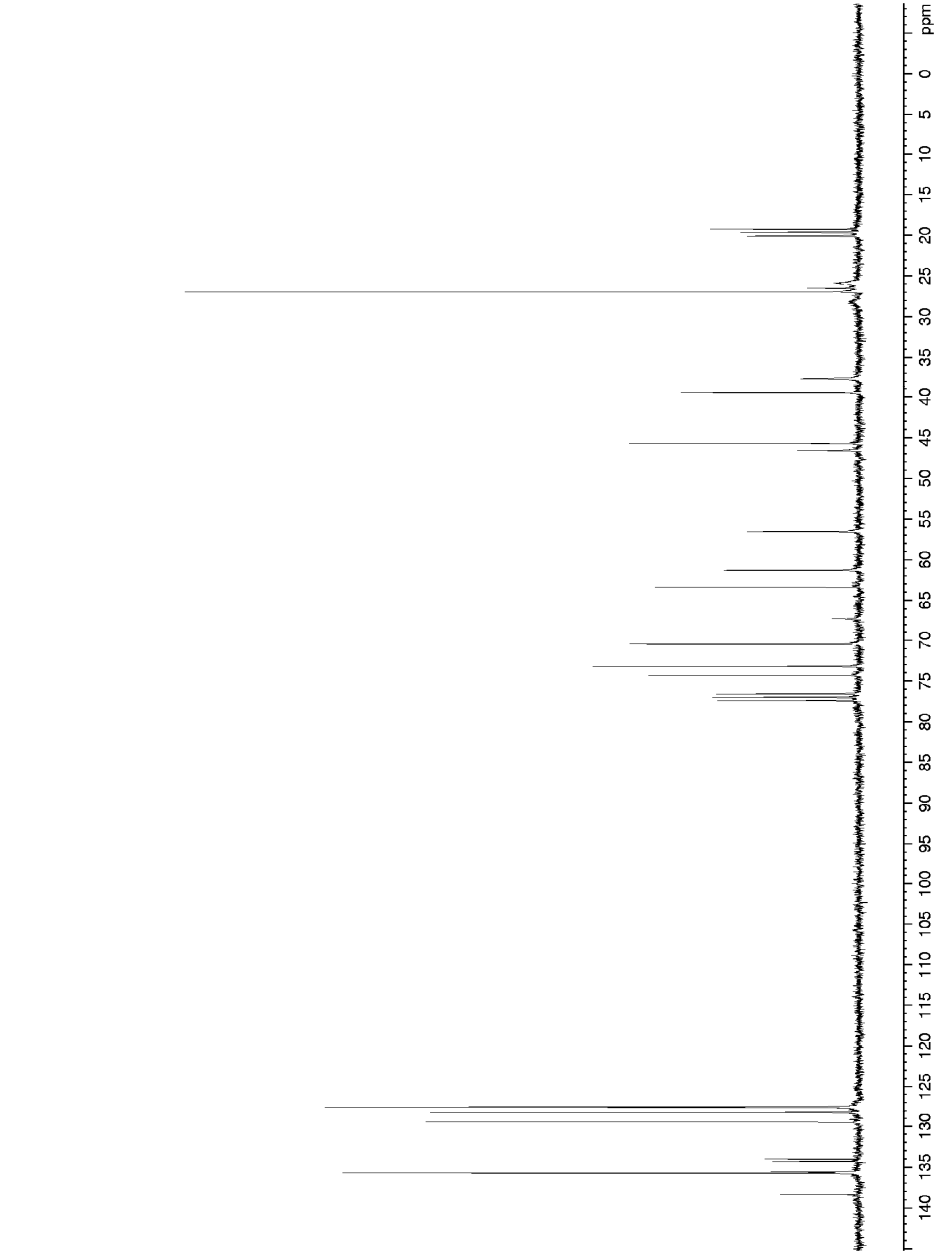

```

NAME: Y510R249 2nc spot 2D
EXPNO: 1
PROCNO: 1
Date_Time: 20060311
Date_Exp: 0308
INSTRUM: spect
PROBHD: 5 mm QNP 1H/13
PULPROG: zg30
TD: 32768
SOLVENT: cdcl3
NS: 16
DS: 4
SWH: 3156.560 MHz
FIDRES: 0.086331 Hz
AQ: 5.1905012 sec
RG: 96.5
DM: 158.400 usec
DE: 6.00 usec
TE: 300.0 K
D1: 0.10000000 sec

----- CHANNEL f1 -----
NUC1: 1H
P1: 9.30 usec
PL1: 0.00 dB
SFO1: 300.1314256 MHz
SI: 16394
SF: 300.1300118 MHz
WDW: EM
SSB: 0
LB: 0
GB: 0
PC: 0.80

```

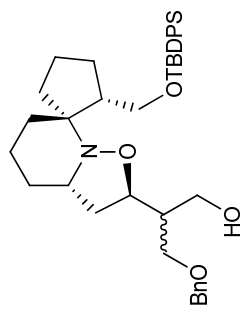

**28**  
more polar compound

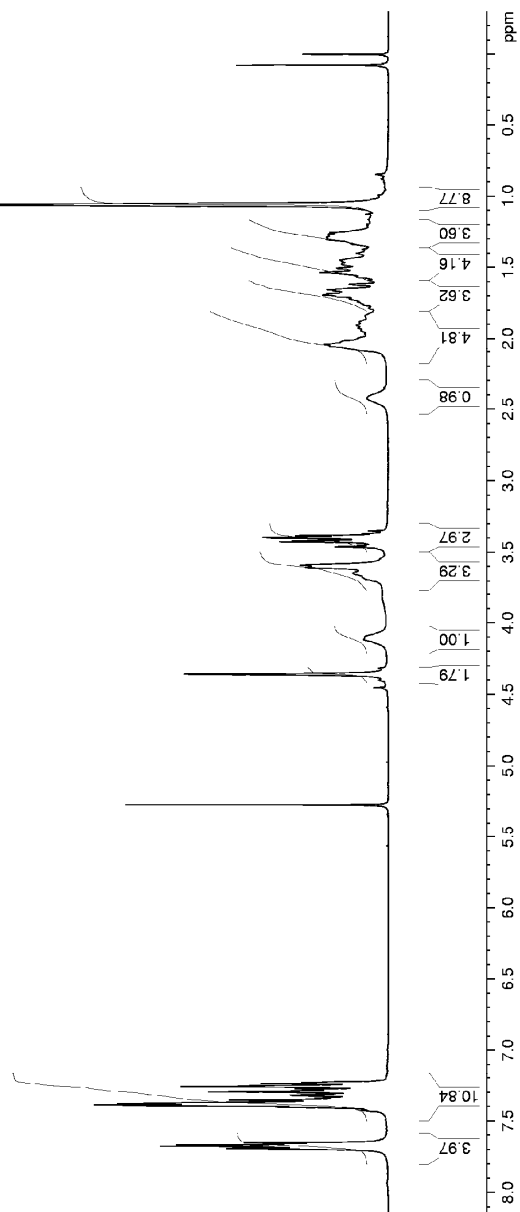





```

NAME: Y81R347 2D
EXPNO: 1
PROCNO: 1
Date_
Time: 20061020
INSTRUM: spect
PROBHD: 5 mm QNP 1H/13
PULPROG: zg30
TD: 32768
SOLVENT: cdcl3
NS: 16
DS: 4
AQ: 4464.119 Hz
FIDRES: 0.22339 Hz
RG: 352.57797 sec
AQ: 35.9
DM: 107.200 usec
DE: 6.00 usec
TE: 300.0 K
D1: 6.1000000 sec

----- CHANNEL f1 -----
NUC1: 1H
P1: 9.30 usec
PL1: 0.00 dB
SFO1: 300.1321759 MHz
SI: 16384
WDW: EM
SSB: 0
LB: 0
GB: 0
PC: 1.10

```

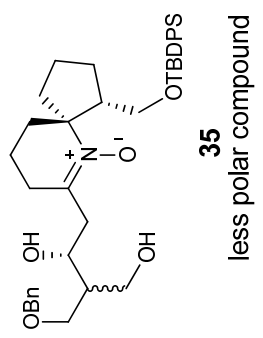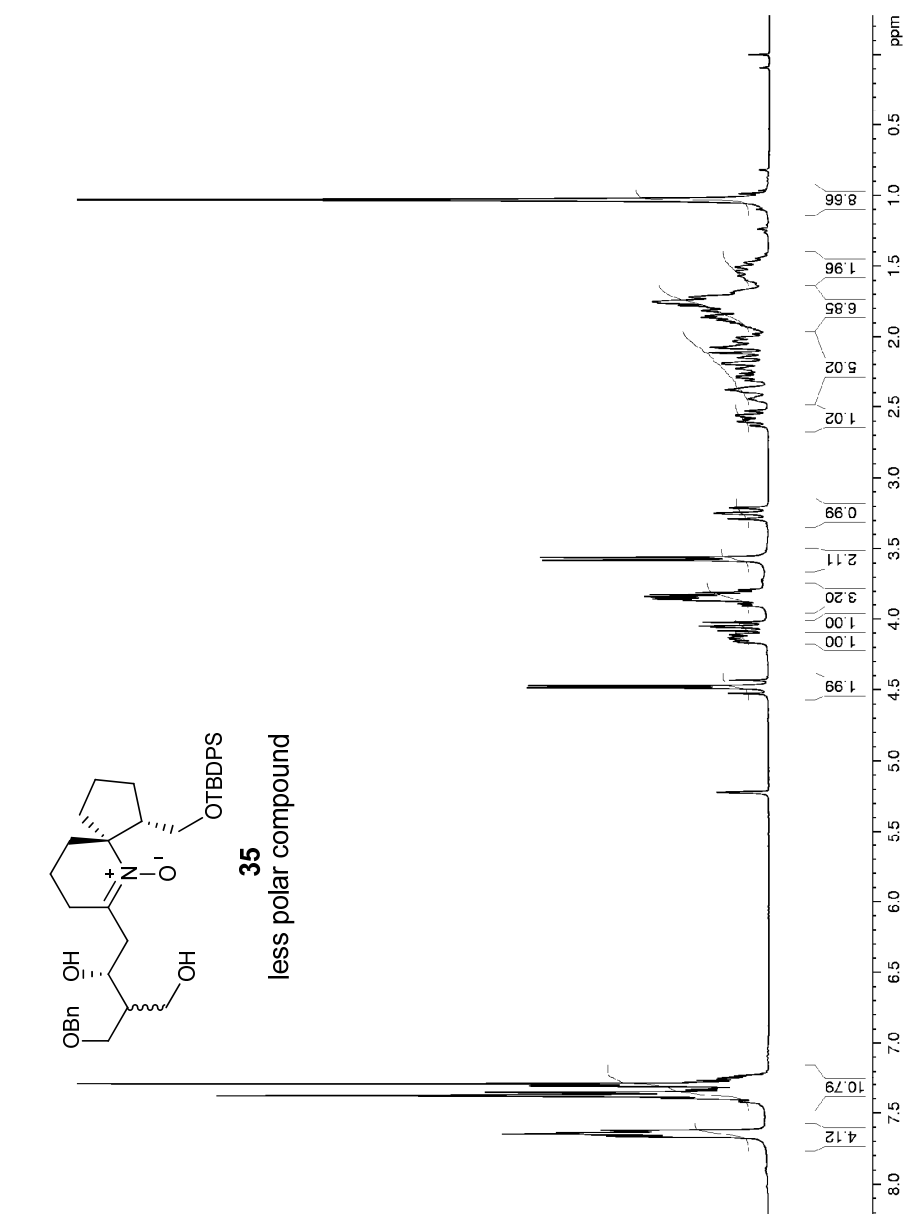

Y5HRS347 27  
NAME  
PROCNO 1  
Date\_ 20061020  
Time 15.39  
INSTRUM spect  
PROBHD 5 mm QNP 1H/13  
PULPROG zgpg30  
TD 65536  
SOLVENT CDCl3  
NS 200  
DS 4  
AQ 7.085610 Hz  
FIDRES 0.274439 Hz  
RG 1.48219608 sec  
RG 1.62894  
DW 2.000000 usec  
DE 300.0 usec  
TE 300.2 K  
D1 0.17593171 sec  
d11 0.03000000 sec  
d12 0.00002000 sec  
===== CHANNEL f1 =====  
NUC1 13C  
P1 5.00 usec  
PL1 6.00 dB  
SFO1 75.760973 MHz  
===== CHANNEL f2 =====  
CPDPRG2 waltz16  
NUC2 1H  
P2 100.00 usec  
PL2 19.00 dB  
PL12 20.80 dB  
PL13 26.40 dB  
SFO2 300.1312005 MHz  
S1 32768  
SFO 75.677454 MHz  
SSB 0  
LB 1.00 Hz  
GB 0  
LC 0.60

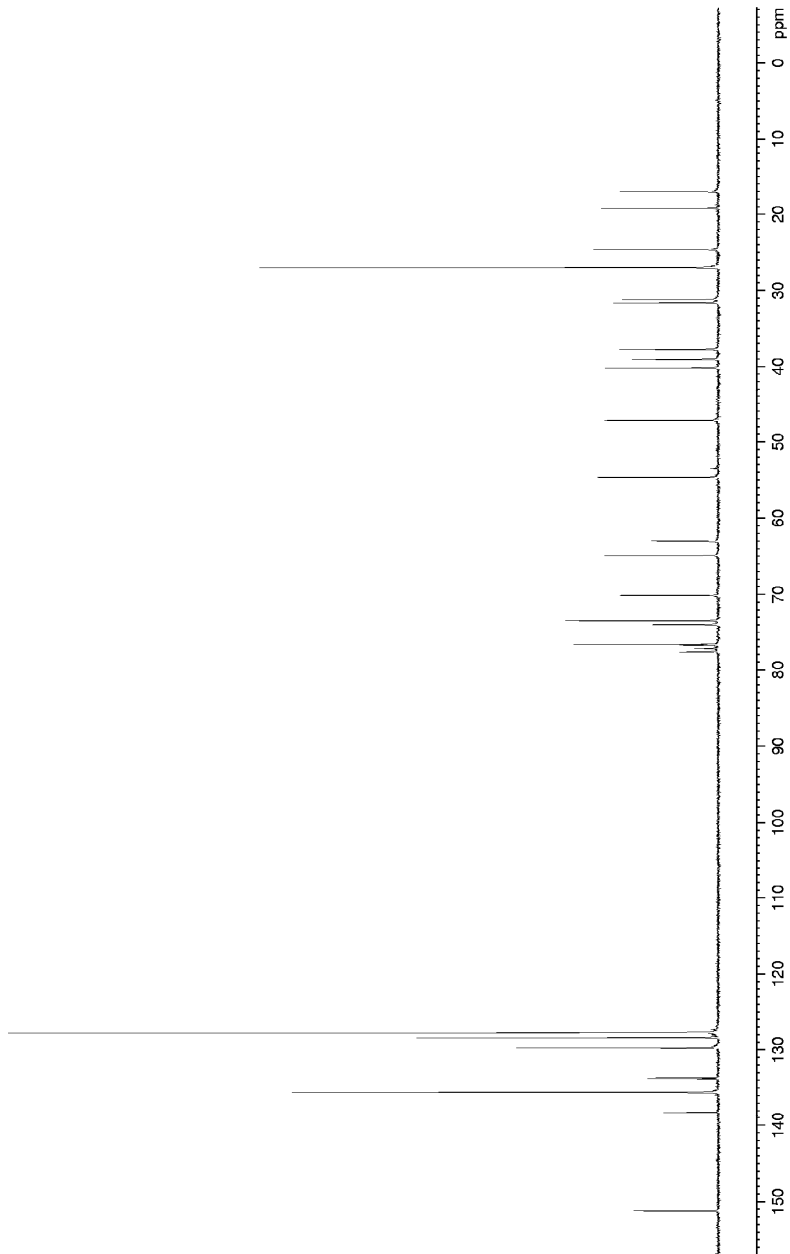

```

NAME: Y81R34E 2D
EXPNO: 1
PROCNO: 1
Date_
Time: 20061021
INSTRUM: spect
PROBHD: 5 mm QNP 1H/13
PULPROG: zg30
TD: 32768
SOLVENT: cdcl3
NS: 16
DS: 4
SFO1: 4664.179 MHz
FIDRES: 0.002339 Hz
AQ: 3.507797 sec
RG: 25.4
DM: 107.200 usec
DE: 6.00 usec
TE: 300.0 K
D1: 6.1000000 sec

----- CHANNEL f1 -----
NUC1: 13C
P1: 9.30 usec
PL1: 0.00 dB
SFO1: 300.1321759 MHz
SI: 16394
AFW: 300.1300151 MHz
SSB: 0
LB: 0
GB: 0
PC: 1.10

```

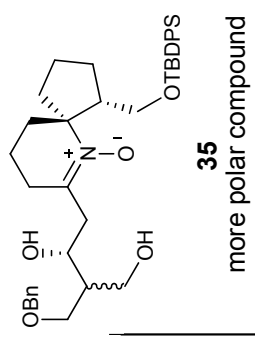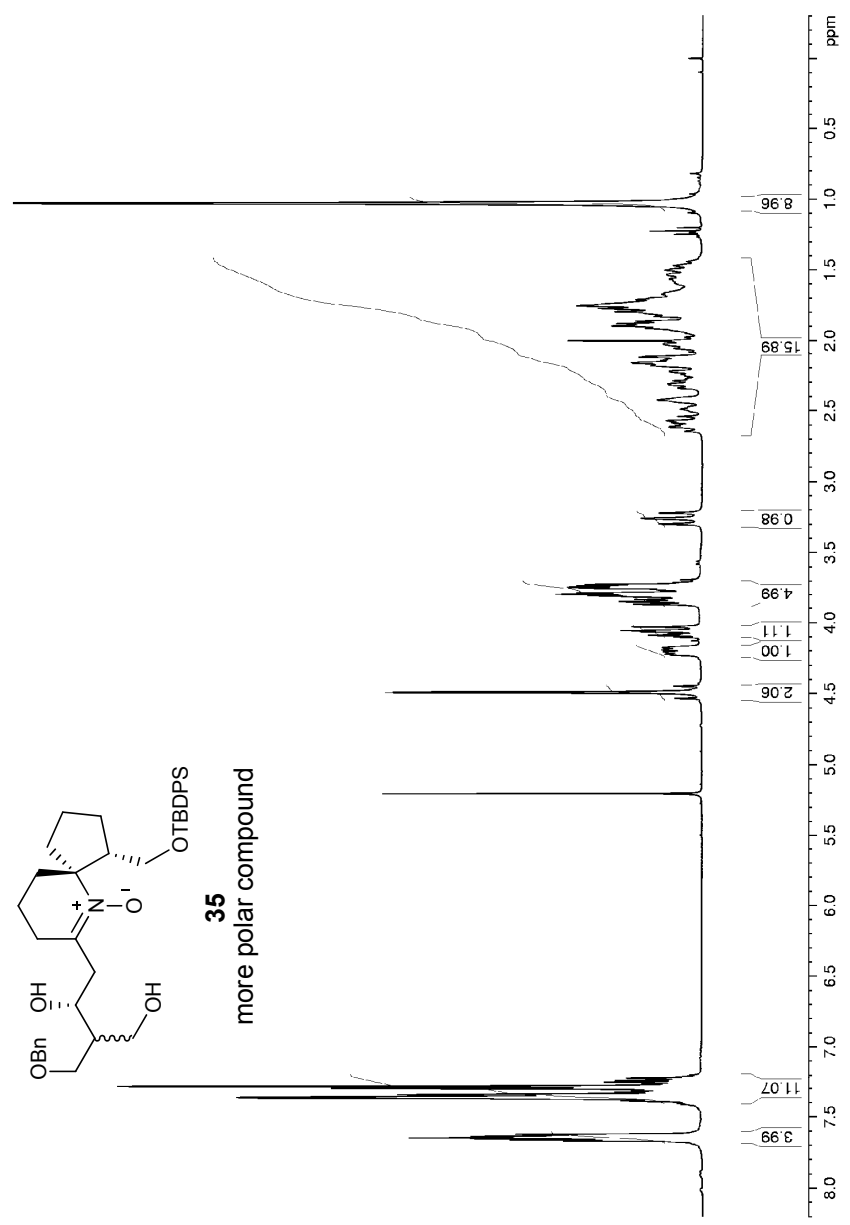

```

NAME          YSHR34B 27
PROCNO       1
Date_        20061021
Time         14.44
INSTRUM      spect
PROBHD       5 mm QNP 1H/13
PULPROG      zgpg30
TD           65536
SOLVENT      CDCl3
NS           200
DS           4
AQ           1.7985610 Hz
FIDRES       0.274439 Hz
RG           1.48219608 sec
RG           1.62894
AQ           2.00000000 sec
RG           2.00000000 sec
RG           300.0
RG           300.0
D1           0.17593171 sec
d11          0.03000000 sec
d12          0.00002000 sec

===== CHANNEL f1 =====
NUC1         13C
P1           5.00 usec
PL1          6.00 dB
SFO1         75.769973 MHz

===== CHANNEL f2 =====
CPDPRG2      waltz16
NUC2         1H
P2           100.00 usec
PL2          0.00 dB
SFO2         201.80 MHz
PL12         20.80 dB
PL13         26.40 dB
SFO2         300.1312005 MHz
SI           32768
SF           75.6677454 MHz
RG          300
SSB          0
LB           1.00 Hz
GB           0
UC           0.60

```

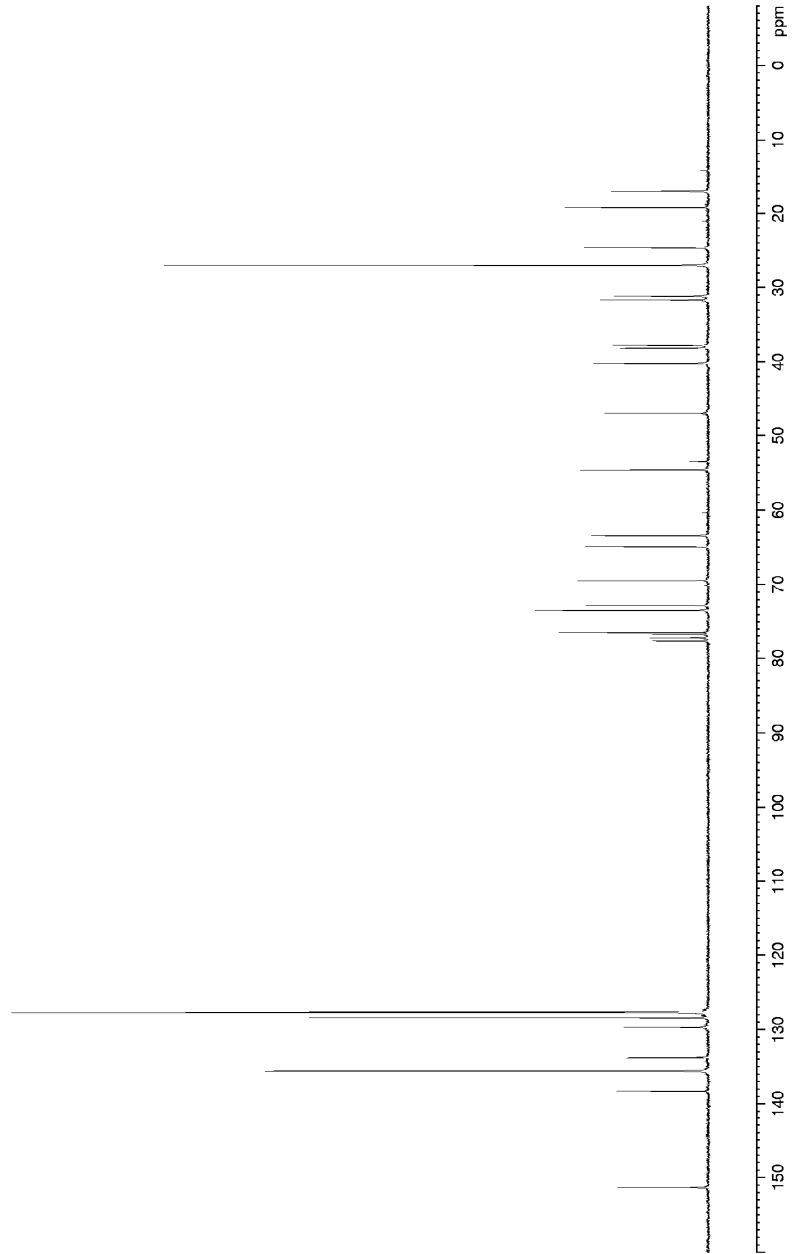

NAME: YSIRV43 - st spot 2D  
 EXENO: 1  
 PROCNO: 1  
 FILE: 20060721  
 TIME: 01:43  
 INSTRUM: spect  
 PROBHD: 5 mm QNP 1H/13  
 PULPROG: zg30  
 TD: 32768  
 SOLVENT: cdcl3  
 NS: 16  
 DS: 4  
 SWH: 4464.179 Hz  
 FIDRES: 0.22339 Hz  
 AQ: 3.527797 sec  
 RG: 143.7  
 DW: 107.200 usec  
 DE: 6.00 usec  
 TE: 300.0 K  
 D1: 6.1000000 sec  
 ----- CHANNEL f1 -----  
 NUC1: 1H  
 P1: 9.50 usec  
 PL1: 1.00 dB  
 SFO1: 300.1321759 MHz  
 SI: 16384  
 SF: 300.1300655 MHz  
 SWH: 50  
 ZG: 0  
 LB: C.10 Hz  
 GB: 0  
 PC: C.80

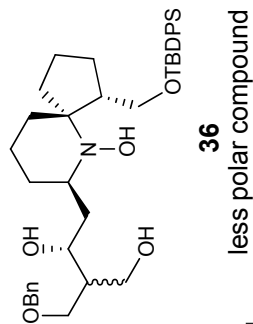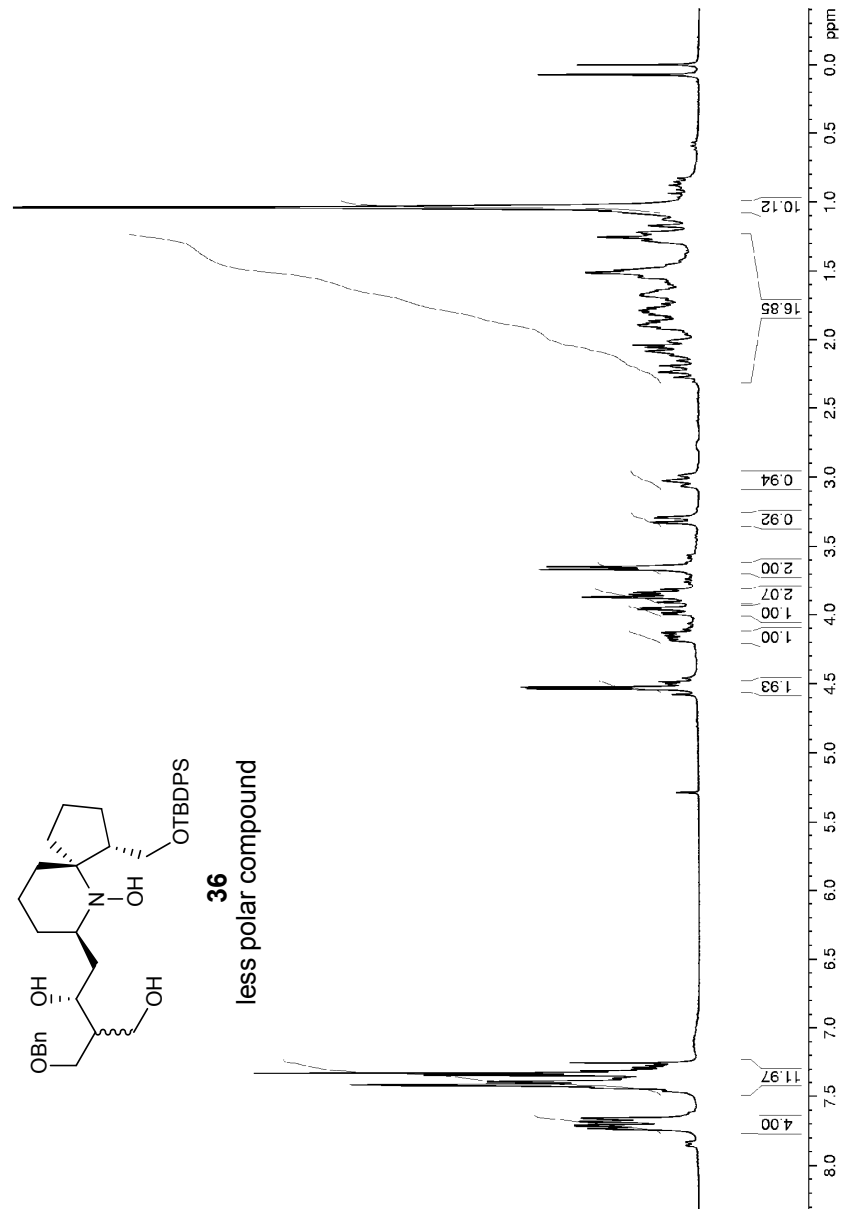

```

NAME          YSH203 TRF spot 23
PROCNO       1
Date_        20060728
Time         11.49
INSTRUM      spect
PROBHD       5 mm QNP 1H/13
PULPROG      zgpg30
TD           65536
SOLVENT      CDCl3
NS           200
DS           4
AQ           1.7985610 Hz
FIDRES       0.274439 Hz
RG           1.48219608 sec
RG           9196.2
AQ           27.000 usec
RG           300.0 usec
DE           300.0 usec
DI           0.17593171 sec
d11          0.03000000 sec
d12          0.00020000 sec

===== CHANNEL f1 =====
NUC1         13C
P1           5.00 usec
PL1          6.00 dB
SFO1         75.760973 MHz

===== CHANNEL f2 =====
CPDPRG2      waltz16
NUC2         1H
P2           100.00 usec
PL2          19.00 dB
SFO2         300.1312005 MHz
PL12         19.00 dB
PL13         25.20 dB
SFO12        75.6777204 MHz
SFO13        300.1312005 MHz
SI           32768
SF           300.1312005 MHz
SSBO         0
LB           1.00 Hz
GB           0
LC           0.60

```

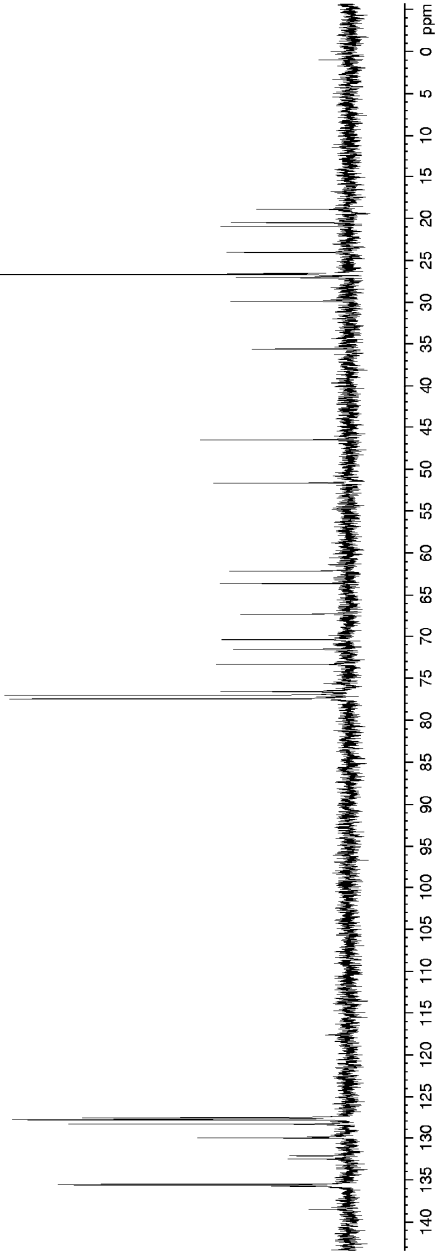

Current Data Parameters  
 NAME 75MR283 2nd spot 2D  
 EXPNO 1  
 PROCNO 1

F2 - Acquisition Parameters

Date\_ 20060802  
 Time 14.44  
 INSTRUM spect  
 PROBHD 5 mm QNP 1H/13  
 PULPROG zg30  
 TD 32768  
 SOLVENT CDCl3  
 NS 16  
 DS 0  
 SWH 4864.179 Hz  
 FIDRES 0.142339 Hz  
 AQ 3.5127797 sec  
 RG 128  
 DM 107.200 usec  
 DE 6.00 usec  
 TE 300.0 K  
 D1 0.10000000 sec

\*\*\*\*\* CHANNEL f1 \*\*\*\*\*  
 NUC1 1H  
 P1 9.50 usec  
 PL1 -1.00 dB  
 SF01 300.1321759 MHz

F2 - Processing parameters

SF 300.1300066 MHz  
 SI 16384  
 MDW EM  
 SSB 0  
 LB 0.10 Hz  
 GB 0  
 PC 0.80

1D NMR plot parameters  
 CX 22.00 cm  
 CY 58.87 cm  
 F1P 8.865 ppm  
 F2P 2657.68 Hz  
 F2 -0.264 ppm  
 PPM0H 0.41346 ppm/cm  
 HZ0H 124.09617 Hz/cm

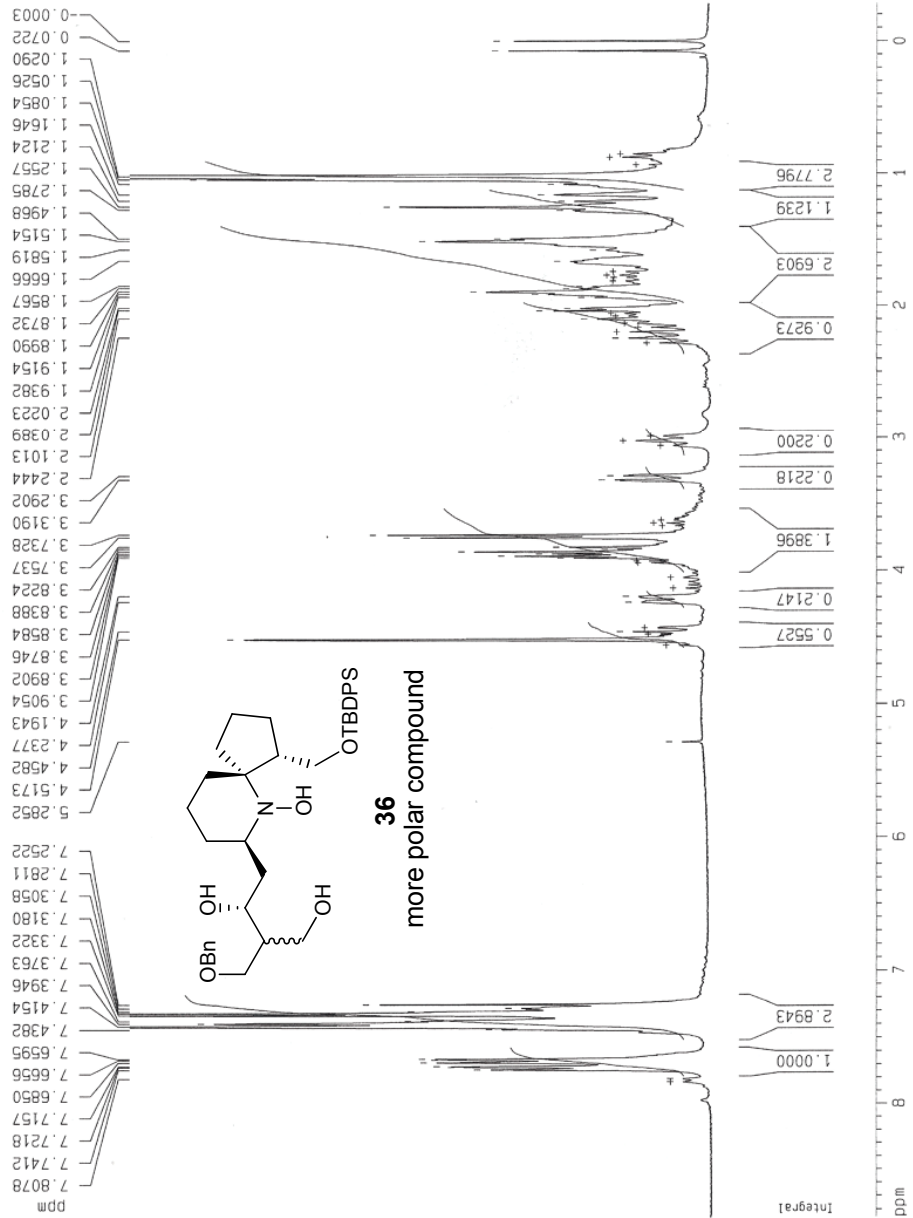

```

NAME      YSHP203 2nd spot 23
PROCNO    1
Date_     20060902
Time      14:51
INSTRUM   spect
PROBHD    5 mm QNP 1H/13
PULPROG   zgpg30
TD         65536
SOLVENT   CDCl3
NS         200
DS         4
AQ         1.7985610 Hz
FIDRES    0.274439 Hz
RG         1.48219608 sec
RG         11895.2
RW         27.000 usec
RE         300.0 usec
DE         300.0 usec
DI         0.17593171 sec
d11       0.03000000 sec
d12       0.00002000 sec

===== CHANNEL f1 =====
NUC1      13C
P1         5.00 usec
PL1        6.00 dB
SFO1      75.760973 MHz

===== CHANNEL f2 =====
CPDPRG2   waltz16
NUC2      1H
P2         100.00 usec
PL2        19.00 dB
SFO2      300.1312005 MHz
=====
S1         32768
SI         32768
RG1        50
SSB        0
LB         1.00 Hz
GB         0
LC         0.60

```

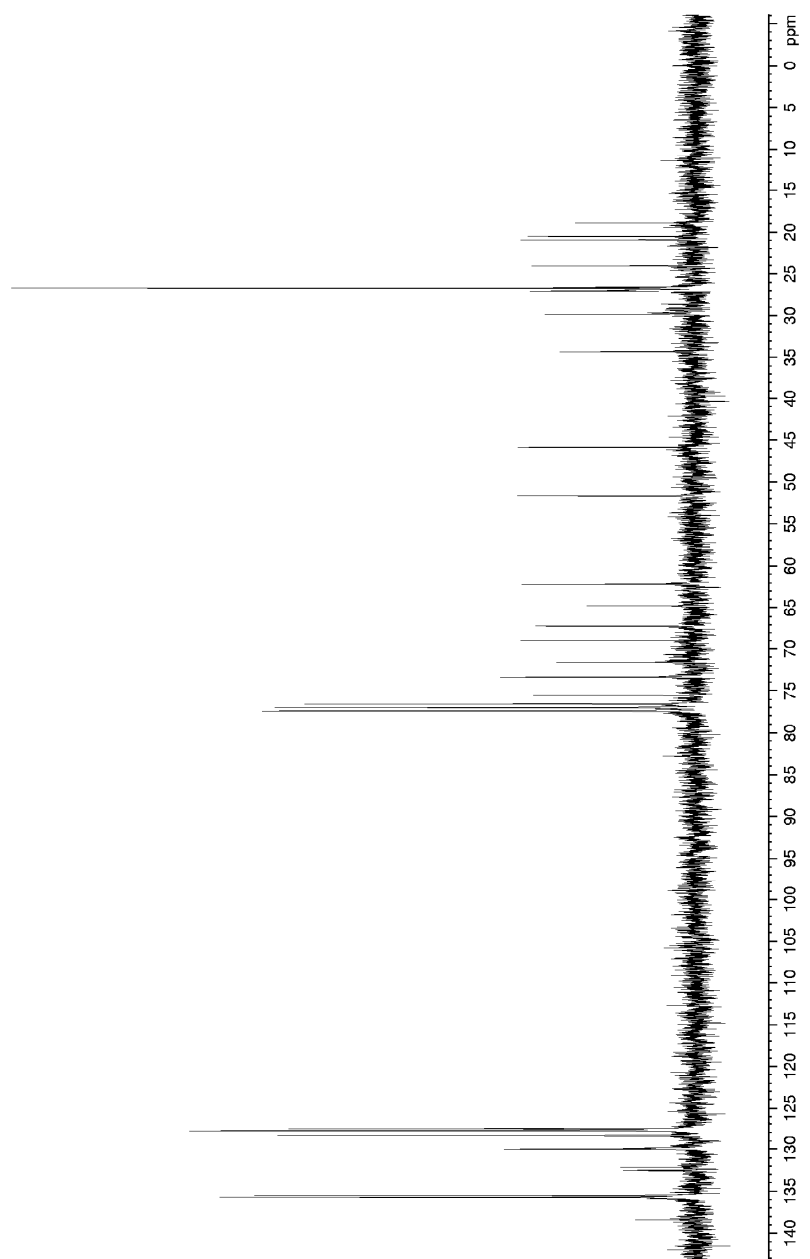



```

NAME: Y01R35Z 2D
EXPNO: 1
PROCNO: 1
Date_
Time: 20061021
INSTRUM: spect
PROBHD: 5 mm QNP 1H/13
PULPROG: zg30
TD: 32768
SOLVENT: CDCl3
NS: 16
DS: 4
AQ: 4464.179 Hz
FIDRES: 0.22339 Hz
RG: 352.9
AQ: 3.527797 sec
RC: 35.9
DM: 107.200 usec
DE: 6.00 usec
TE: 300.0 K
D1: 6.1000000 sec
----- CHANNEL f1 -----
NUC1: 1H
P1: 9.30 usec
PL1: 0.00 dB
SFO1: 300.1321759 MHz
SI: 16394
WDW: EM
SSB: 0
LB: 0
GB: 0
PC: 6.80

```

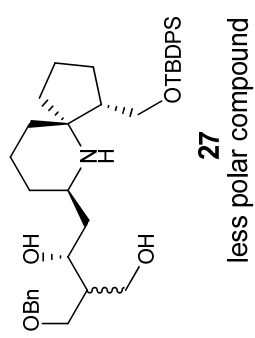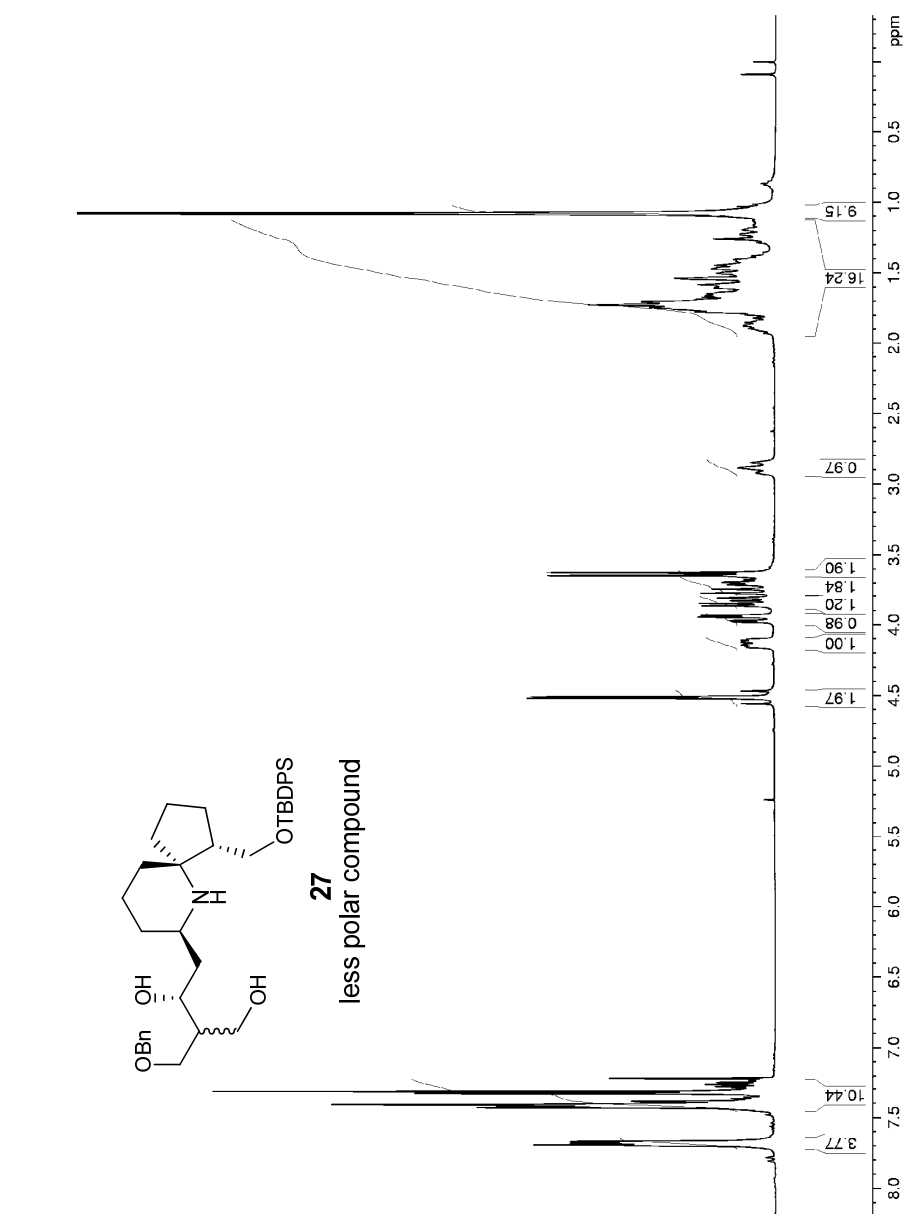

```

NAME          YSHR52 27
PROCNO       1
Date_        20061027
Time         11.35
INSTRUM     spect
PULPROG     zgpg30
PROBHD      5 mm QNP 1H/13
PULPROG     zgpg30
TD          65536
SOLVENT     CDCl3
NS          200
DS          4
AQ          1.7985610 Hz
FIDRES     0.274439 Hz
RG          1.48219608 sec
AQ         27.000 usec
RG         162894
DE         300.0 usec
TE         300.2 K
D1         0.1759171 sec
d11        0.0300000 sec
d12        0.0002000 sec

===== CHANNEL f1 =====
NUC1        13C
P1          5.00 usec
PL1         6.00 dB
SFO1        75.760973 MHz

===== CHANNEL f2 =====
CPDPRG2    waltz16
NUC2        1H
P2          100.00 usec
PL2         0.00 dB
SFO2        201.80 MHz
PL12        20.80 dB
PL13        26.40 dB
SFO3        300.1312005 MHz
SI         32768
RG          50
SSB         0
LB          1.00 Hz
GB          0
UC          0.60

```

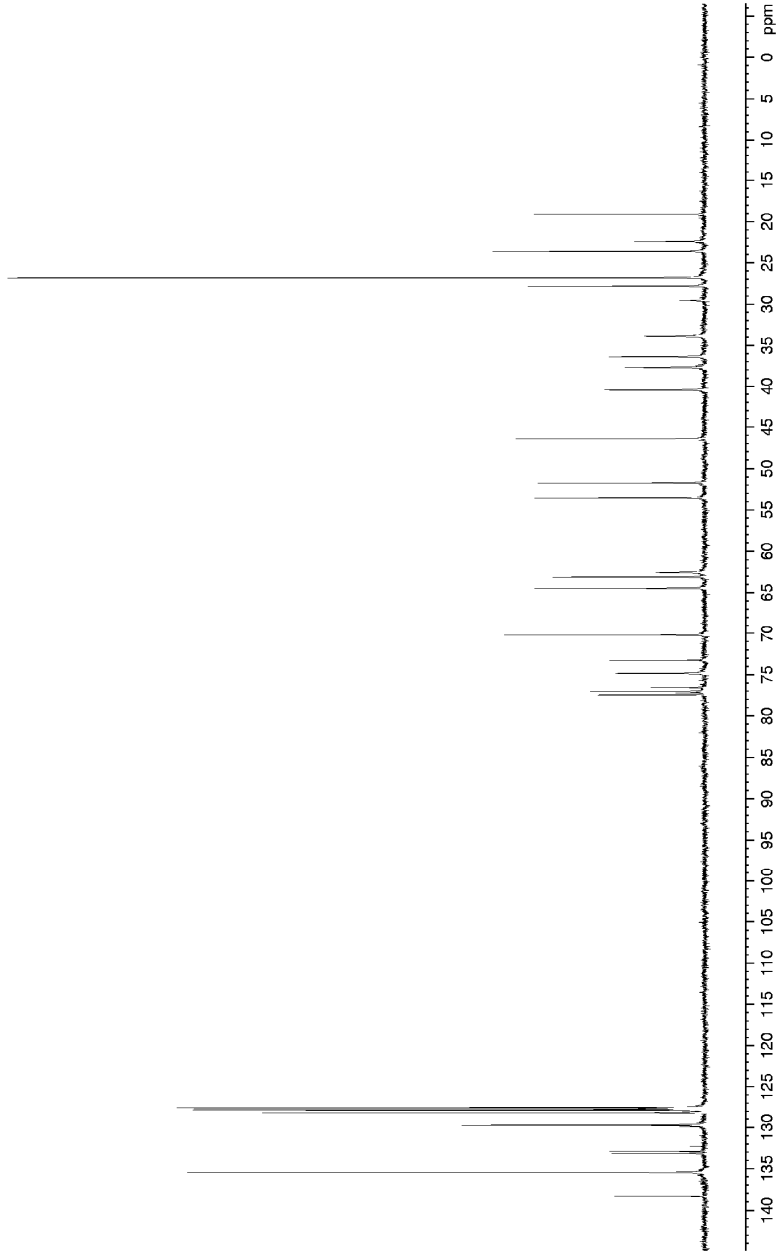

```

NAME: Y5HR454 NOB7Y
EXPNO: 1
PROCNO: 1
Date_
Time: 20061026
INSTRUM: spect
PROBHD: 5 mm QNP 1H/13
PULPROG: zg30
TD: 32768
SOLVENT: CDCl3
NS: 16
DS: 4
SWH: 44664.119 Hz
FIDRES: 0.002339 Hz
AQ: 3.527797 sec
RG: 32
DM: 107.200 usec
DE: 6.00 usec
TE: 300.0 K
D1: 6.1000000 sec
----- CHANNEL f1 -----
NUC1: 1H
P1: 9.30 usec
PL1: 0.00 dB
SFO1: 300.1321759 MHz
SI: 16384
WDW: EM
SSB: 0
LB: 0
GB: 0
PC: 6.80

```

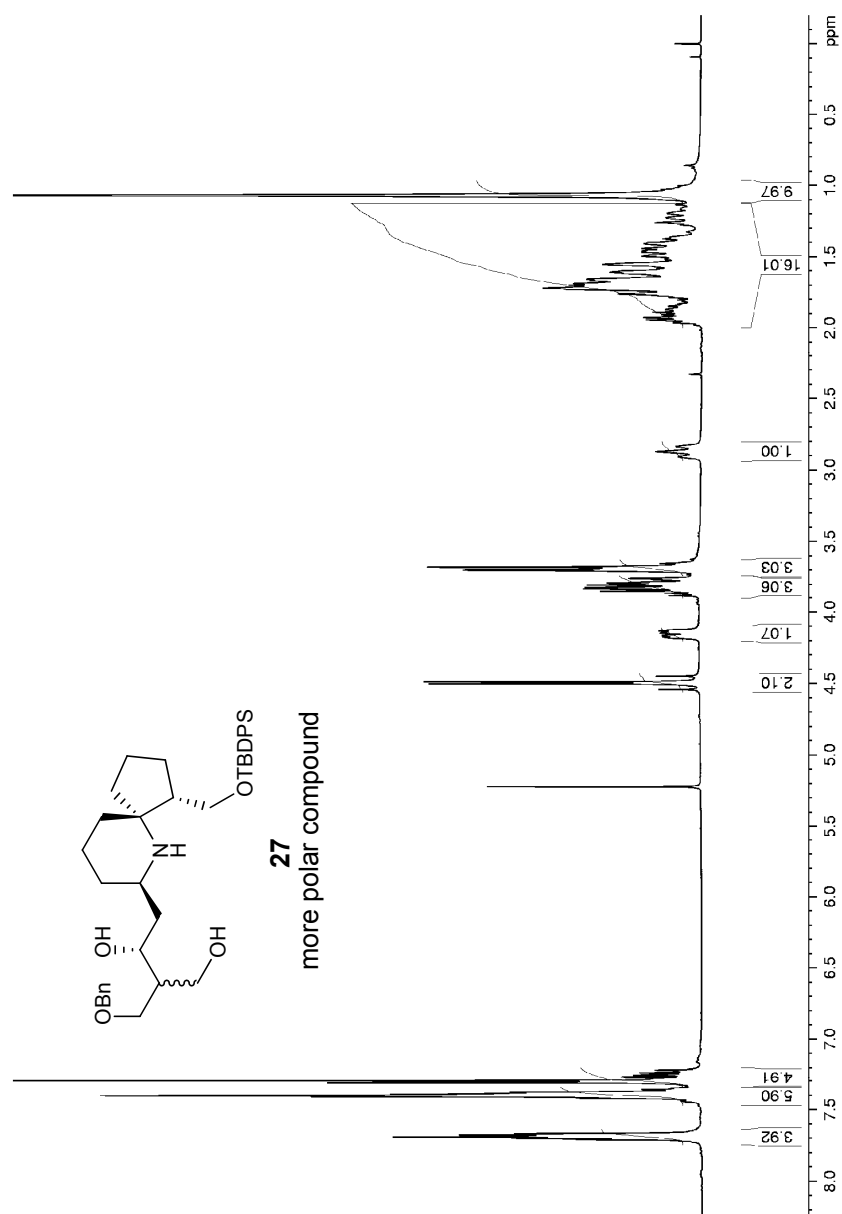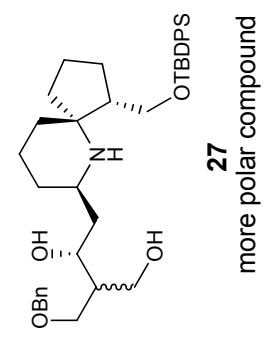



```

NAME: Y5TR362TQWD
EXPNO: 1
PROCNO: 1
Date_Time: 20061211 9:03
INSTRUM: spect
PROBHD: 5 mm QNP 1H/13
PULPROG: zg30
TD: 32768
SOLVENT: DMSO
NS: 16
DS: 4
SWH: 44664.179 MHz
FIDRES: 0.22339 Hz
AQ: 3.527797 sec
RG: 96.5
DM: 107.200 usec
DE: 6.00 usec
TE: 300.0 K
D1: 6.1000000 sec

----- CHANNEL f1 -----
NUC1: 13C
P1: 9.30 usec
PL1: 0.00 dB
SFO1: 300.1321759 MHz
SI: 16384
WDW: EM
SSB: 0
LB: 0
GB: 0
PC: 0.80

```

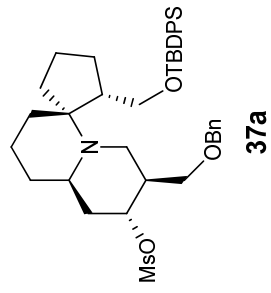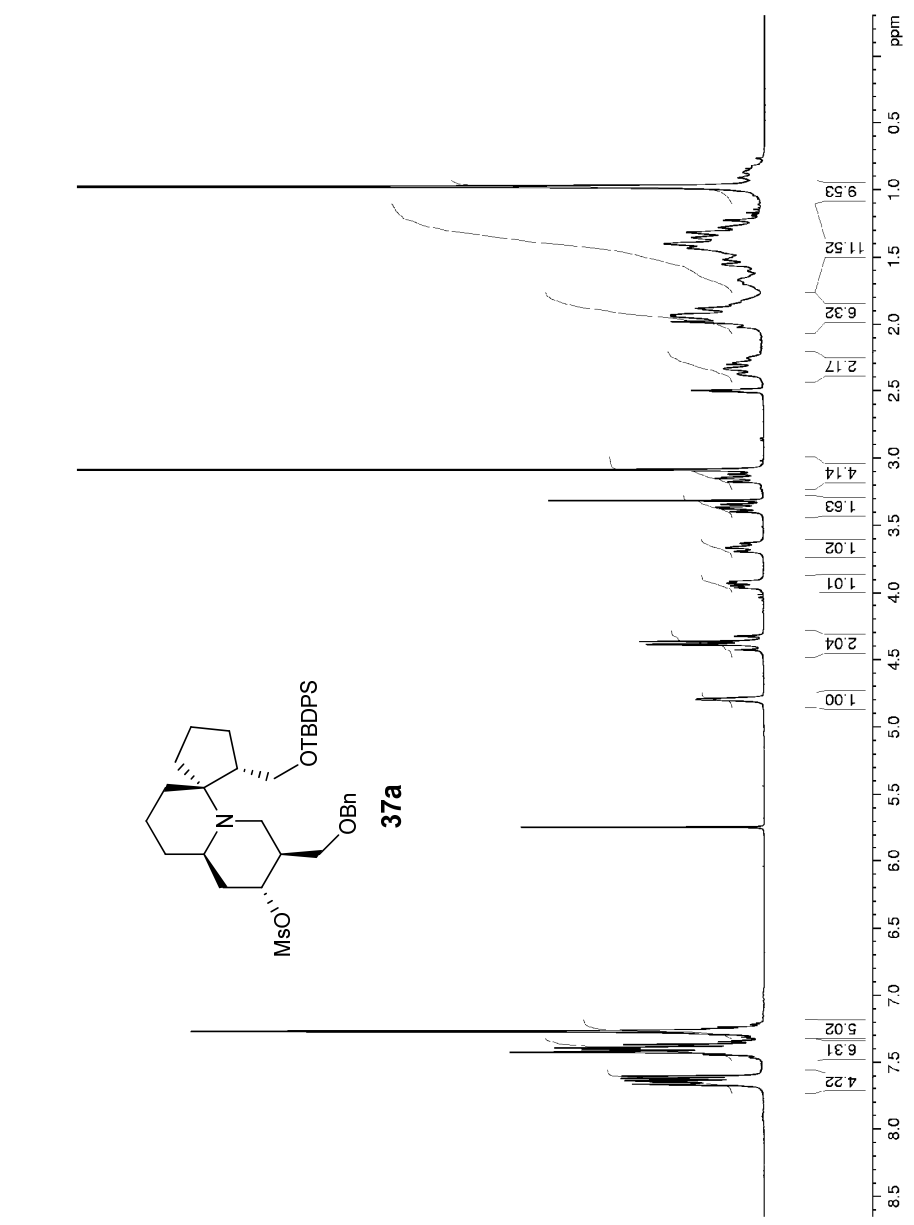

```

NAME      YSHR3621-0W
PROCNO    1
Date_     20061214
Time      9.17
INSTRUM   spect
PROBHD    5 mm QNP 1H/13
PULPROG   zgpg30
TD         65536
SOLVENT   DMSO
NS         200
DS         4
SWH        177985.610 Hz
FIDRES     0.274439 Hz
AQ         1.48219608 sec
RG         27162894
RW         27.000 usec
WDW         EM
SSB         0
LB         300.0 Hz
GB         0
D1         0.17599171 sec
d11        0.03000000 sec
d12        0.00002000 sec

===== CHANNEL f1 =====
NUC1       13C
P1         5.44 usec
PL1        4.00 dB
SFO1       75.769973 MHz

===== CHANNEL f2 =====
CPDPRG2   waltz16
NUC2       1H
P2         100.00 usec
PL2        0.00 dB
SFO2       201.80 MHz
PL12       20.80 dB
PL13       26.40 dB
SFO12      300.1312005 MHz
S1         32768
S2         32768
RG1        30
RG2        30
SSB        0
LB         1.00 Hz
GB         0
LC         0.60

```

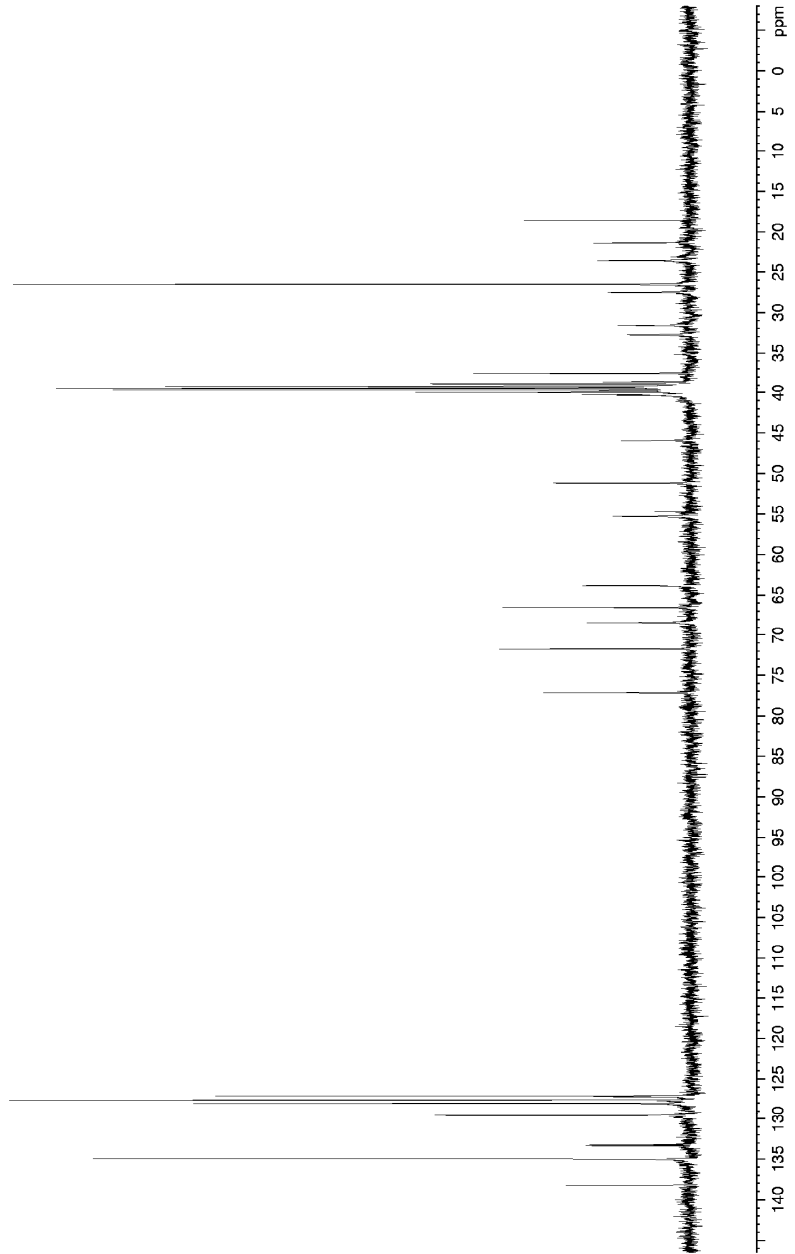

```

NAME: YSTR128.DMSO-VT
EXPNO: 2
PROCNO: 1
Date_Time: 20061111_8:12
INSTRUM: spect
PROBHD: 5 mm QNP 1H/13
PULPROG: zg30
TD: 32768
SOLVENT: DMSO
NS: 8
DS: 4
AQ: 4464.170 Hz
FIDRES: 0.002339 Hz
RG: 3.507797 sec
AQ: 96.5
DM: 107.200 usec
DE: 6.00 usec
TE: 300.0 K
D1: 0.10000000 sec

----- CHANNEL f1 -----
NUC1: 1H
P1: 9.30 usec
PL1: 0.00 dB
SFO1: 300.1321759 MHz
SI: 16394
AF: 300.1300013 MHz
WDW: EM
SSB: 0
LB: 0.10 Hz
GB: 0
EC: 0.80

```

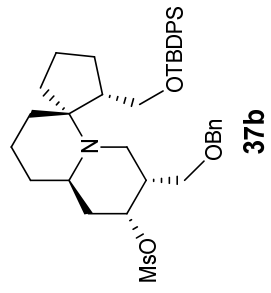

T = 80 degrees

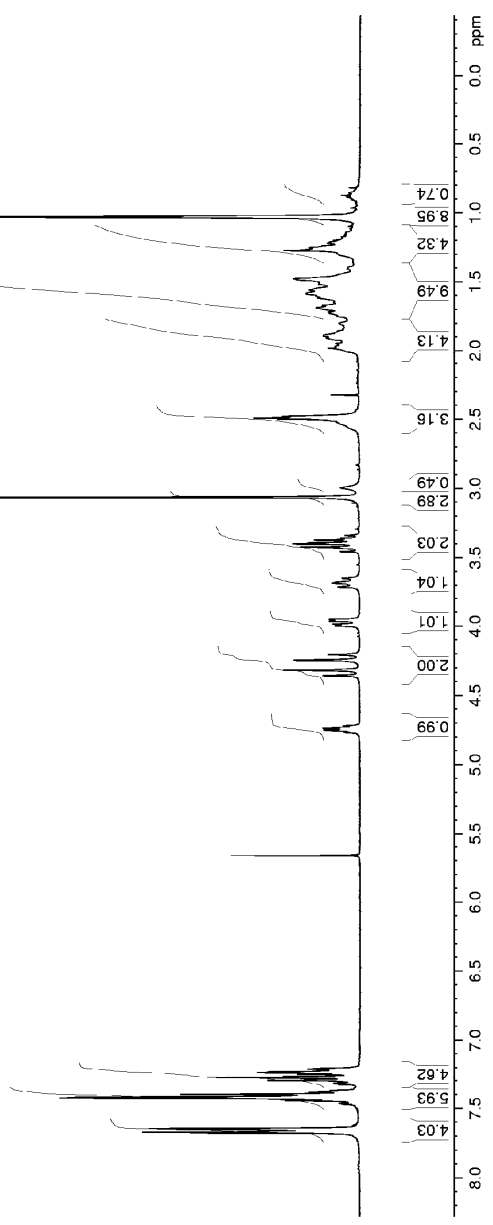

```

NAME      YSHR35B.DMSO-VT
PROCNO    1
Date_     20061110
Time      10.10
INSTRUM   spect
PROBHD    5 mm QNP 1H/13
PULPROG   zgpg30
TD         65536
SOLVENT   DMSO
NS         800
DS         4
AQ         1.77985610 Hz
FIDRES    0.274439 Hz
RG         1.48219608 sec
RW         27.000 usec
RE         162894
RF         300.0 MHz
D1         0.17593171 sec
d11        0.03000000 sec
d12        0.00002000 sec

===== CHANNEL f1 =====
NUC1       13C
P1         5.00 usec
PL1        6.00 dB
SFO1       75.768973 MHz

===== CHANNEL f2 =====
CPDPRG2   waltz16
NUC2       1H
P2         100.00 usec
PL2        20.00 dB
SFO2       300.1312005 MHz
=====
S1         32768
SI         32768
RG         50
SSB        0
LB         1.00 Hz
GB         0
LC         1.00

```

T = 80 degrees

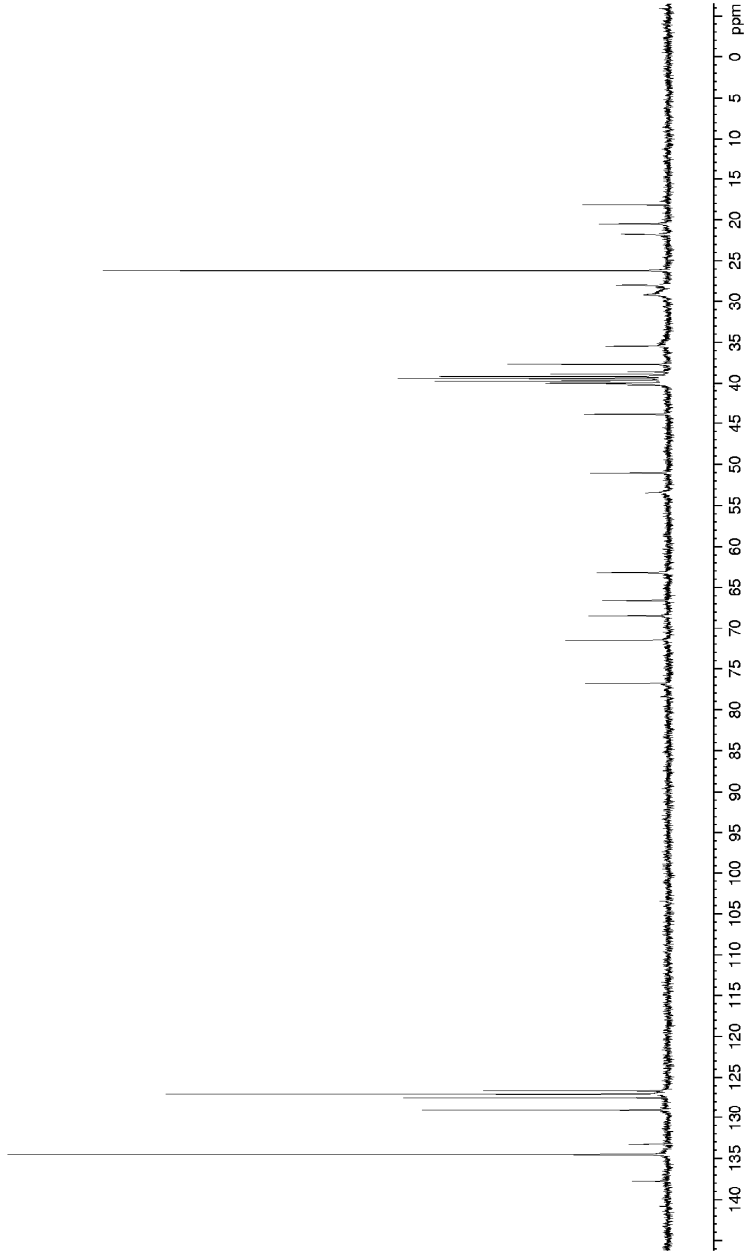



```

NAME: YB13418 +MOD
EXPNO: 1
PROCNO: 1
Date_
Time: 20070221
INSTRUM: spect
PROBHD: 5 mm QNP 1H/13
PULPROG: zg30
TD: 32768
SOLVENT: CDCl3
NS: 16
DS: 4
SWH: 44664.119 Hz
FIDRES: 0.22339 Hz
AQ: 3.527797 sec
RG: 45.3
DM: 107.200 usec
DE: 6.00 usec
TE: 300.0 K
D1: 6.1000000 sec
----- CHANNEL f1 -----
NUC1: 1H
P1: 9.30 usec
PL1: 0.00 dB
SFO1: 300.1321759 MHz
SI: 16384
RG: 300.1300090 MHz
SWH: 50
FIDRES: 0
LB: 0
GB: 0
PC: 6.80

```

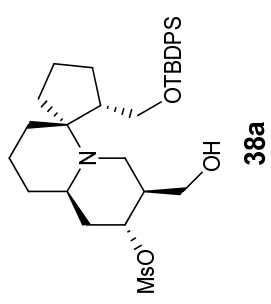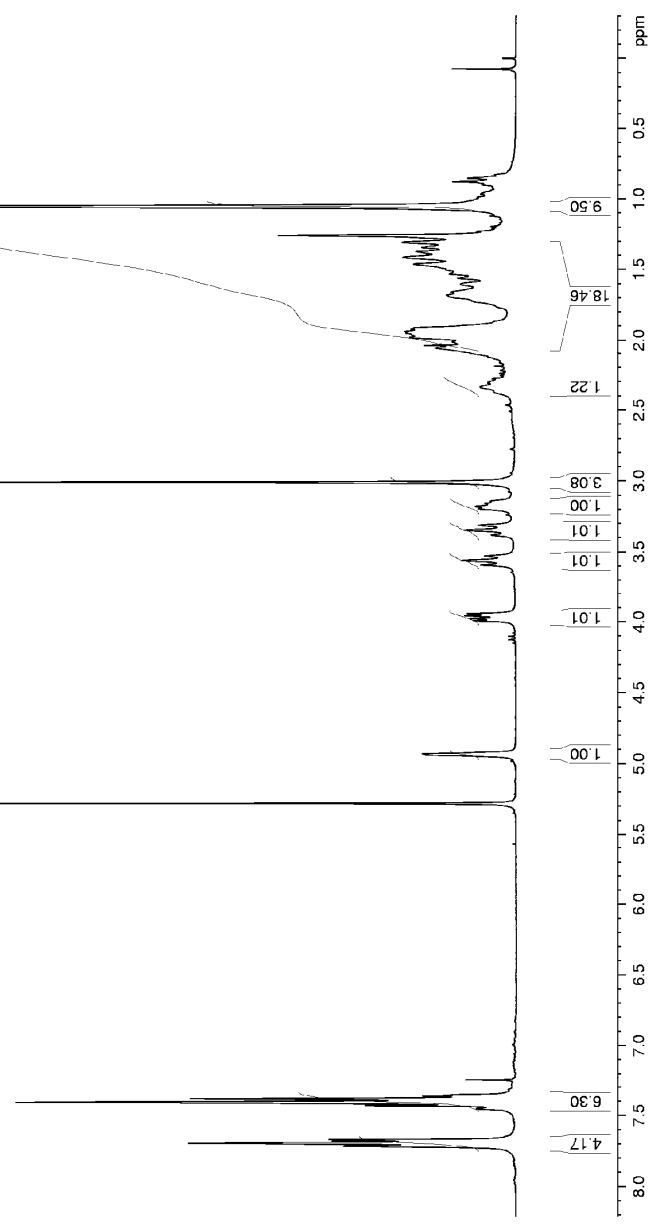

```

NAME          YSHRCL18 (two)
PROCNO       1
Date_        20070220
Time         17.40
INSTRUM     spect
PROBHD      5 mm QNP 1H/13
PULPROG     zgpg30
TD          65536
SOLVENT     CDCl3
NS          700
DS          4
AQ          1.77985610 Hz
FIDRES      0.274439 Hz
RG          1.48219608 sec
RG          1.62894
AQ          27.0000 usec
RG          300.00 usec
DE          300.00 usec
DI          0.17599171 sec
d11         0.03000000 sec
d12         0.00002000 sec

===== CHANNEL f1 =====
NUC1        13C
P1          5.44 usec
PL1         4.00 dB
SFO1       75.776973 MHz

===== CHANNEL f2 =====
CPDPRG2     waltz16
NUC2        1H
P2          100.00 usec
PL2         0.00 dB
SFO2       201.80 MHz
PL12        20.80 dB
PL13        26.40 dB
SFO12       300.1312005 MHz
S1          32768
S2          32768
RG1         30
RG2         30
SSB         0
LB          1.00 Hz
GB          0
LC          1.00

```

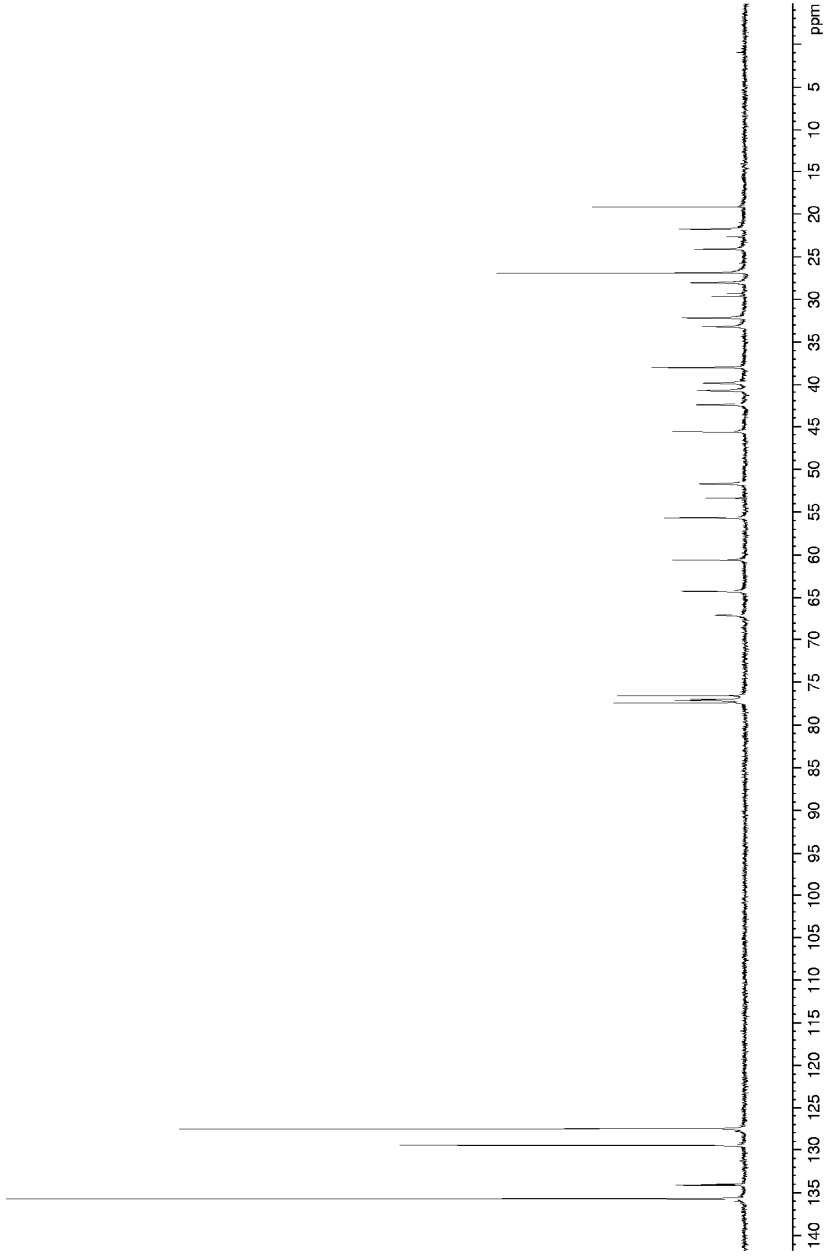

```

NAME: YB1341 / 1.m0D
EXPNO: 1
PROCNO: 1
PULPROG: zgpg30
TD: 65536
SOLVENT: DMSO
AQ: 0.086331 Hz
RG: 327.68
SI: 1024
SF: 300.1300115 MHz
WDW: EM
SSB: 0
LB: 0
GB: 0
PC: 1.00
----- CHANNEL f1 -----
NUC1: 1H
P1: 9.30 usec
PL1: 0.00 dB
SFO1: 300.1314256 MHz
SI: 1024
WDW: EM
SSB: 0
LB: 0
GB: 0
PC: 1.00

```

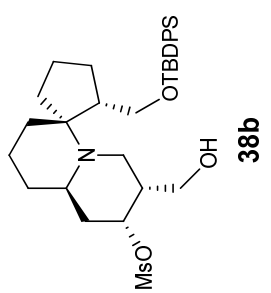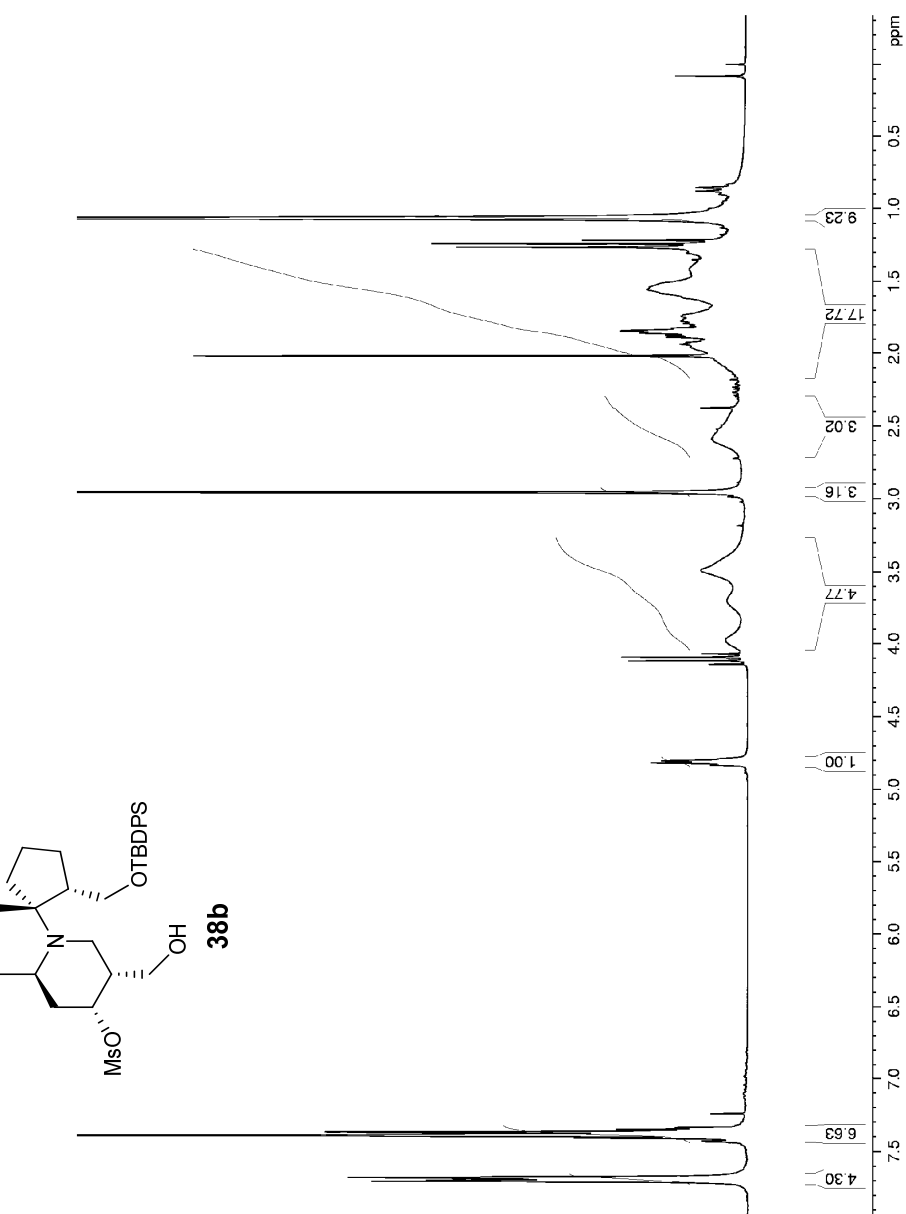



```

NAME: YB13430 F160D
EXPNO: 1
PROCNO: 1
PULPROG: zgpg30
TD: 65536
SOLVENT: CDCl3
NS: 16
DS: 4
SWH: 44664.119 MHz
FIDRES: 0.22339 Hz
AQ: 3.527797 sec
RG: 96.5
DM: 107.200 usec
DE: 6.00 usec
TE: 300.2 K
D1: 6.1000000 sec
----- CHANNEL f1 -----
NUC1: 1H
P1: 9.30 usec
PL1: 0.00 dB
SFO1: 300.1321759 MHz
SI: 16384
SF: 300.1300111 MHz
WDW: EM
SSB: 0
LB: 0
GB: 0
EC: 0

```

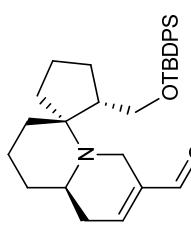

39

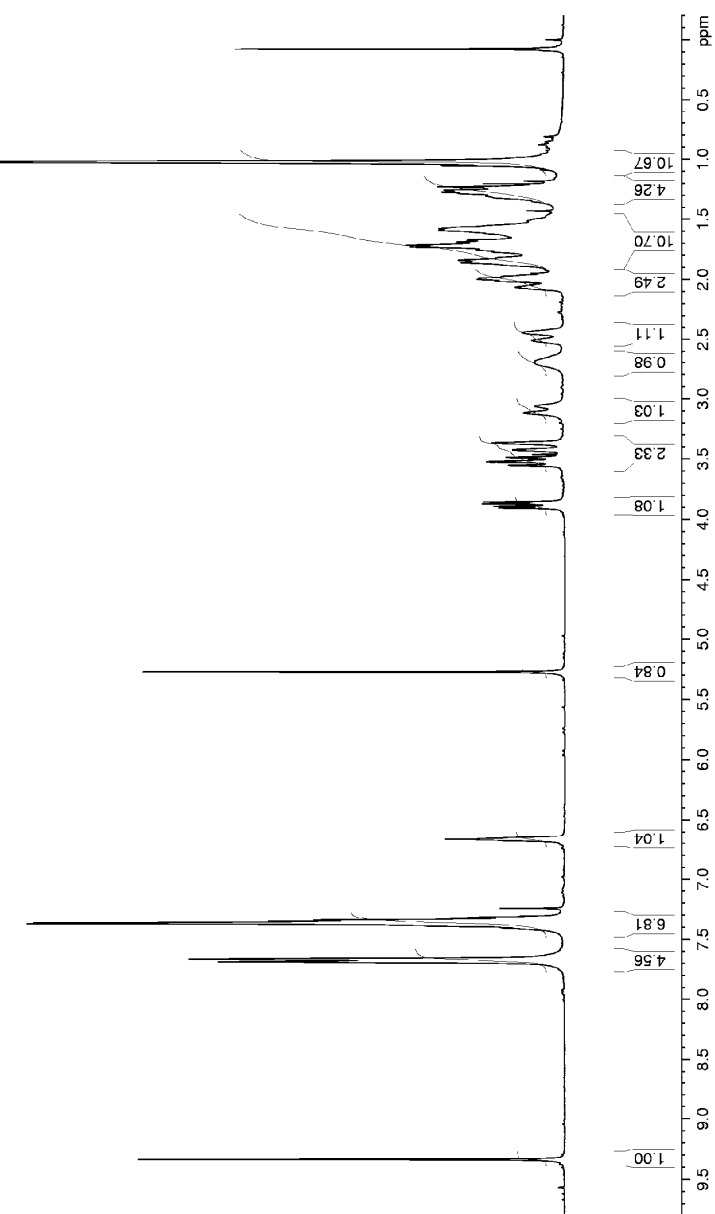

```

NAME          VSHRCL30 t two
PROCNO       1
Date_        20070216
Time         17:29
INSTRUM     spect
PROBHD      5 mm QNP 1H/13
PULPROG     zgpg30
TD          65536
SOLVENT     CDCl3
NS          700
DS          4
AQ          1.77985610 Hz
FIDRES      0.274439 Hz
RG          1.48219608 sec
RG          1.62894
AQ          27.000 usec
RG          300.0 usec
DE          300.0 usec
DI          0.17593171 sec
d11         0.03000000 sec
d12         0.00002000 sec

===== CHANNEL f1 =====
NUC1        13C
P1          5.44 usec
PL1         4.00 dB
SFO1        75.7760973 MHz

===== CHANNEL f2 =====
CPDPRG2     waltz16
NUC2        1H
P2          100.00 usec
PL2         0.00 dB
SFO2        300.1312005 MHz
PL12        20.80 dB
PL13        26.40 dB
SFO12       300.1312005 MHz
S1          32768
S2          32768
RG1         30
RG2         30
SSB         0
LB          1.00 Hz
GB          0
UC          1.00

```

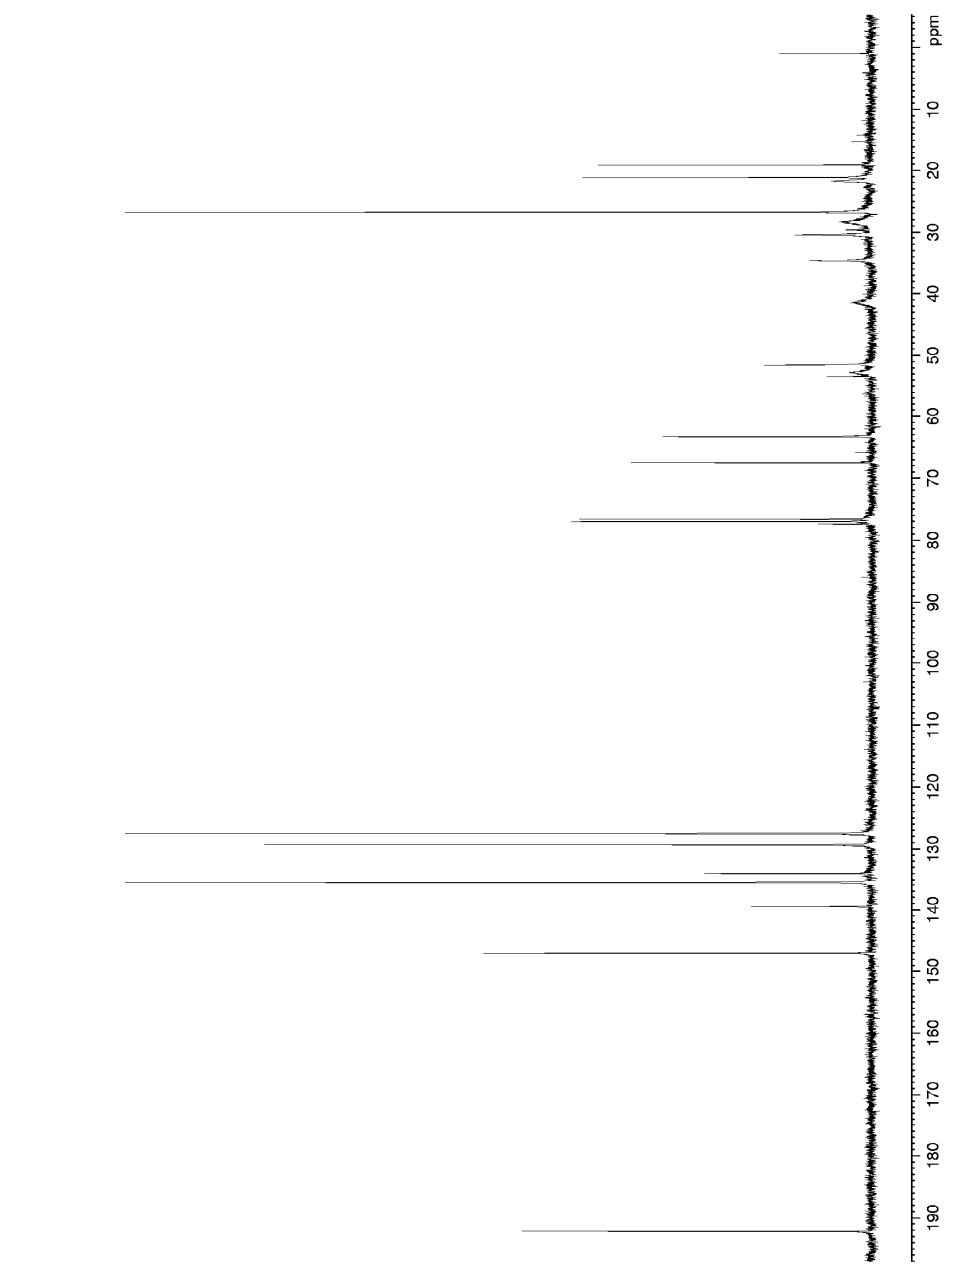

```

NAME: YEUTB13 F10D
EXPNO: 1
PROCNO: 1
PULPROG: zgpg30
TD: 65536
SOLVENT: CDCl3
NUC1: 13C
INSTRUM: spect
PROBHD: 5 mm BBO BB-1H
PULPROG: zgpg30
TD: 65536
SOLVENT: CDCl3
NS: 16
DS: 4
SWH: 64000.000 MHz
FIDRES: 0.85625 Hz
AQ: 2.5559340 sec
RG: 65.6
DM: 78.000 usec
DE: 6.50 usec
TE: 300.0 K
D1: 0.10000000 sec
----- CHANNEL f1 -----
NUC1: 13C
P1: 14.40 usec
PL1: 2.20 dB
SFO1: 400.1326009 MHz
SI: 16384
WDW: EM
SSB: 0
LB: 0
GB: 0
PC: 0

```

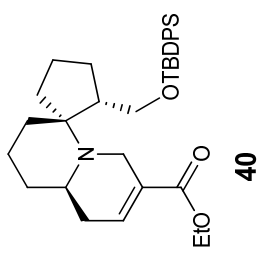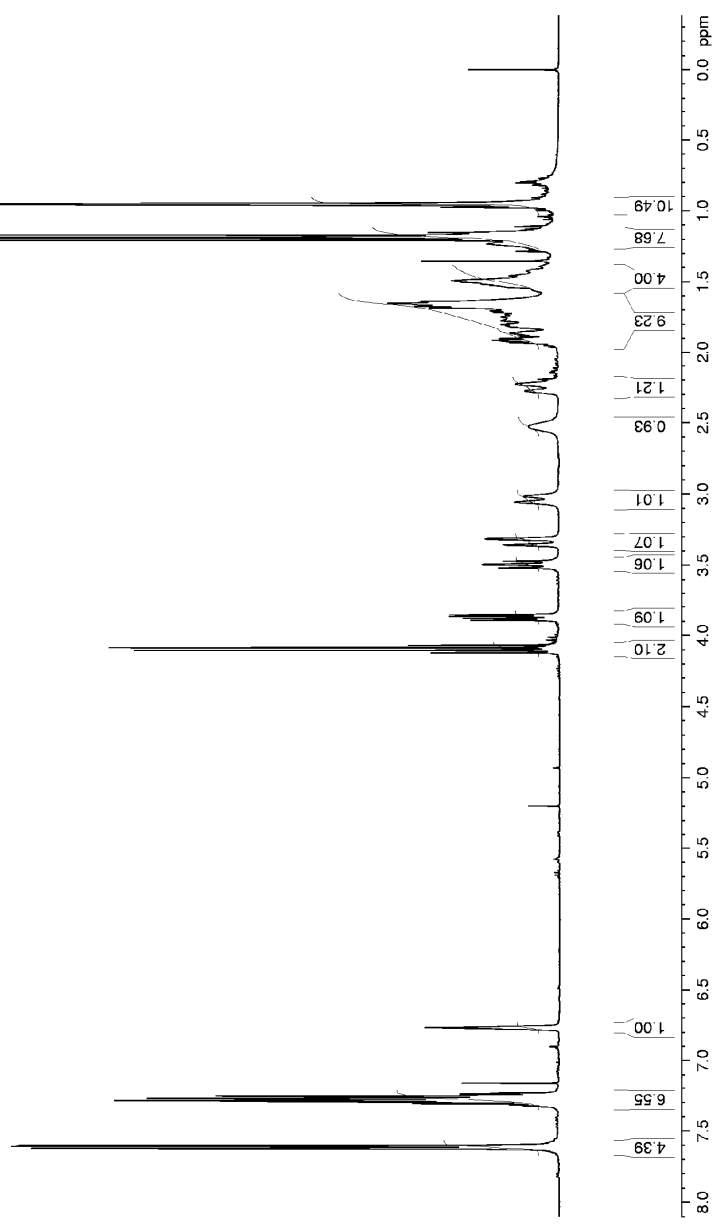

```

NAME          VSHR513: two7
PROCNO       1
Date_        20070626
Time         7.47
INSTRUM     spect
PULPROG     zgpg30
PROBHD      5 mm BBO D3 1H
PULPROG     zgpg30
TD          65536
SOLVENT     CDCl3
NS          400
DS          4
SWH         24038.460 Hz
F2         0.366798 Hz
FIDRES     1.363198 sec
RG         10321.3
AQ         20.600 usec
RG         300.0 usec
DE         0.63154089 sec
DI         0.0300000 sec
d11        0.0000000 sec
d12        0.0000000 sec

===== CHANNEL f1 =====
NUC1        13C
P1          5.00 usec
PL1         -1.50 dB
SFO1       100.623997 MHz

===== CHANNEL f2 =====
CPDPRG2    waltz16
NUC2        1H
P2          100.00 usec
PL2         -1.50 dB
SFO2       400.1318000 MHz
PL12       19.10 dB
PL13       22.10 dB
SFO12      400.1318000 MHz
S1         32768
S2         32768
RG1        300
RG2        300
SSB        0
LB         2.00 Hz
GB         0
LC         0.60

```

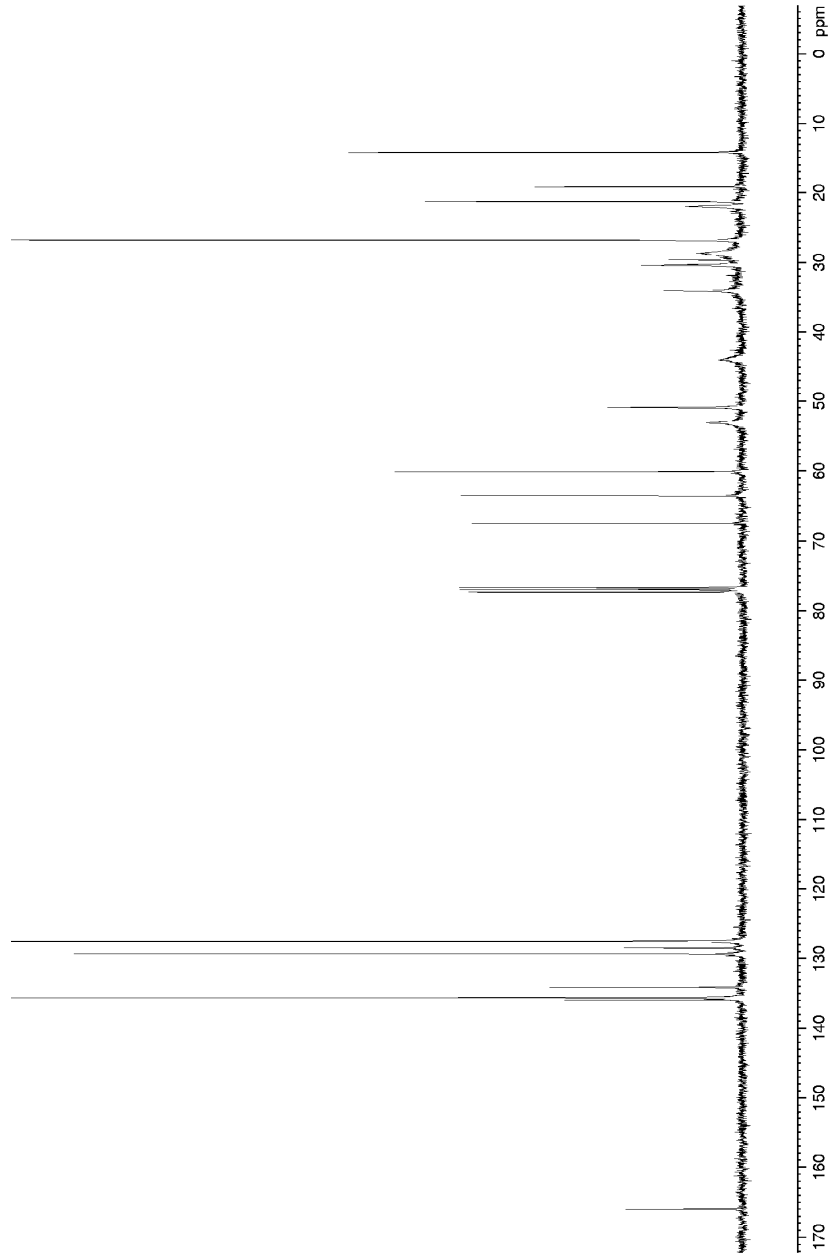



```

NAME: YEUEB99 FMOE
EXPNO: 1
PROCNO: 1
Date_
Time: 20070331
INSTRUM: spect
PROBHD: 5 mm QNP 1H/13
PULPROG: zg30
TD: 32768
SOLVENT: CDCl3
NS: 16
DS: 4
SWH: 4464.179 Hz
FIDRES: 0.002339 Hz
AQ: 3.527797 sec
RG: 128
DM: 107.200 usec
DE: 6.00 usec
TE: 300.0 K
D1: 6.1000000 sec

----- CHANNEL f1 -----
NUC1: 13C
P1: 9.30 usec
PL1: 0.00 dB
SFO1: 300.1321759 MHz
SI: 16384
WDW: EM
SSB: 0
LB: 0
GB: 0
PC: 1.00

```

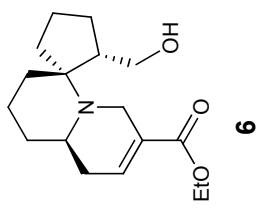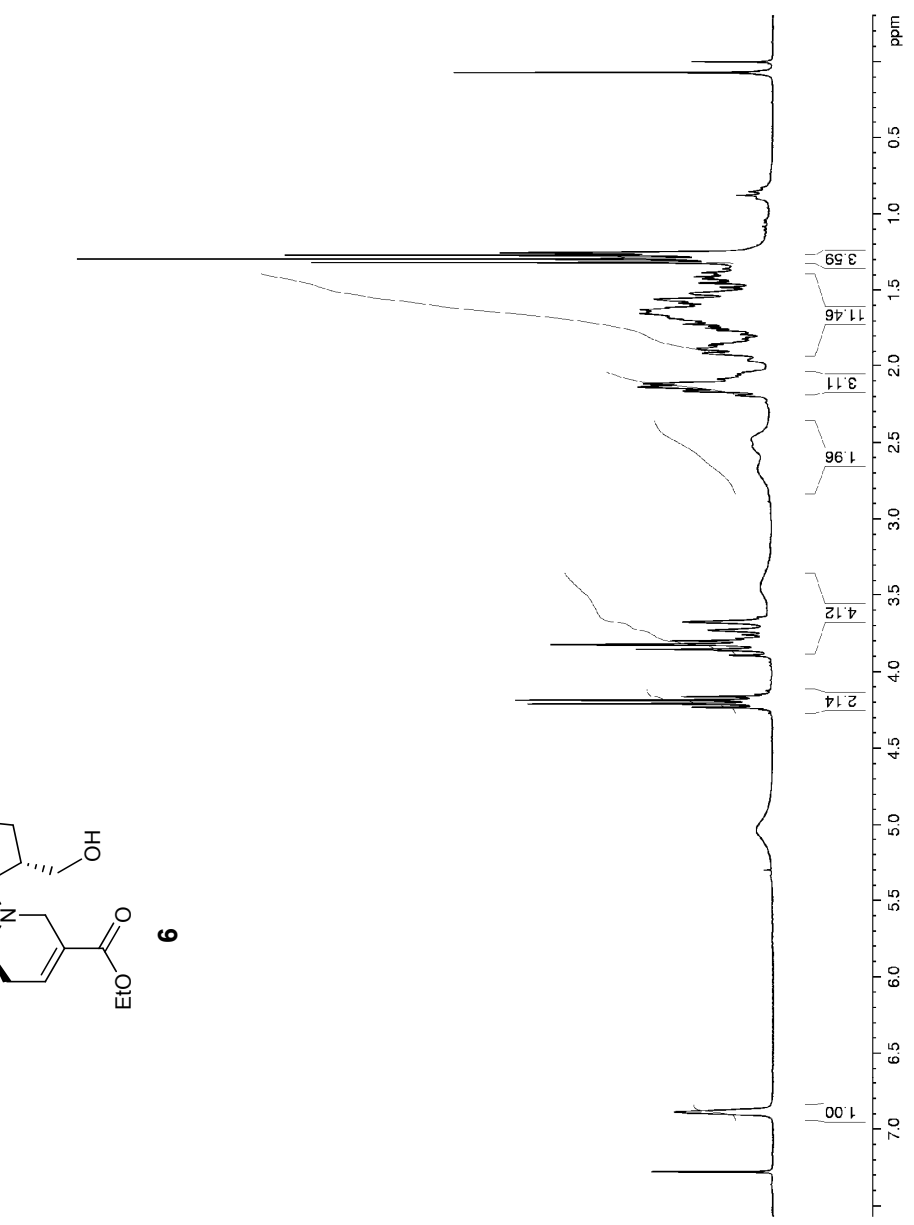

```

NAME          YSHR599 t two
PROCNO       1
Date_        20070930
Time         14.07
INSTRUM      spect
PROBHD       5 mm QNP 1H/13
PULPROG      zgpg30
TD           65536
SOLVENT      CDCl3
NS           2500
DS           4
AQ           1.77985610 Hz
FIDRES       0.274439 Hz
RG           1.48219608 sec
RG           1.62884
AQ           27.000 usec
RG           300.0 usec
RG           300.0 usec
D1           0.17593171 sec
d11          0.03000000 sec
d12          0.00002000 sec

===== CHANNEL f1 =====
NUC1         13C
P1           5.44 usec
PL1          4.00 dB
SFO1         75.776973 MHz

===== CHANNEL f2 =====
CPDPRG2     waltz16
NUC2         1H
P2           100.00 usec
PL2          0.00 dB
SFO2         201.80 MHz
PL12         20.80 dB
PL13         26.40 dB
SFO12        300.1312005 MHz
S1           32768
S2           32768
RG2M         50
LB           1.00 Hz
GB           1.00
LC           1.00

```

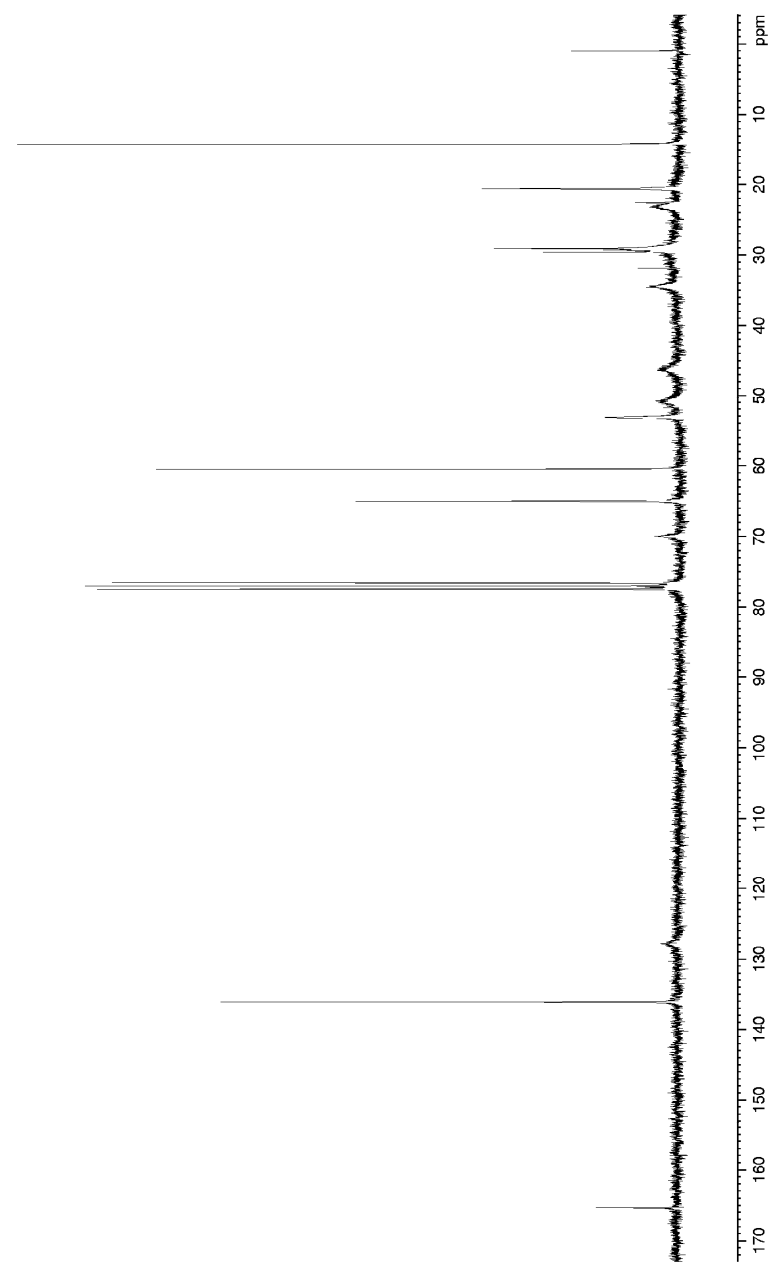

Supplement: b903904j.pdf [file b903904j.pdf]
